# Supplementary material
Source: PubMed Central journal article supplement (PMC3511986)
Supplement: mmc1.pdf [file mmc1.pdf]

## **Supplemental Data**

### **Contribution of Global Rare Copy-Number Variants to the Risk of Sporadic Congenital Heart Disease**

Rachel Soemedi, Ian J. Wilson, Jamie Bentham, Rebecca Darlay, Ana Töpf, Diana Zelenika, Catherine Cosgrove, Kerry Setchfield, Chris Thornborough, Javier Granados-Riveron, Gillian M. Blue, Jeroen Breckpot, Stephen Hellens, Simon Zwolinski, Elise Glen, Chrysovalanto Mamasoula, Thahira J. Rahman, Darroch Hall, Anita Rauch, Koenraad Devriendt, Marc Gewillig, John O' Sullivan, David S. Winlaw, Frances Bu'Lock, J. David Brook, Shoumo Bhattacharya, Mark Lathrop, Mauro Santibanez-Koref, Heather J. Cordell, Judith A. Goodship, and Bernard D. Keavney

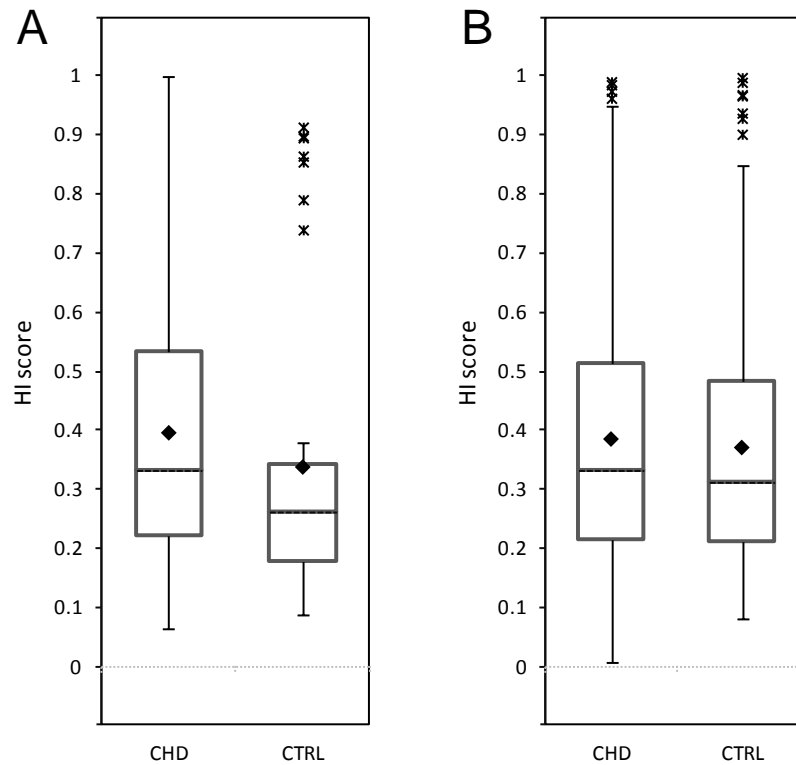

**Figure S1. Haploinsufficiency Score Distribution in Deletions and Duplications**

Box plots showing the distribution of haploinsufficiency (HI) scores of the genes spanned by all deletions (A) and duplications (B) detected in 2256 CHD and 841 unaffected controls. The means are indicated as black diamonds. Deletions in CHD cases are more likely to contain genes that were predicted or known to be haploinsufficient (high HI scores) than controls ( $P = 0.02$ ), as shown in (A). The outliers (red asterisks) refer to six genes (*PRKAB2*, *BCL9*, *PMP22*, *TPK1*, *LINGO2*, *PTPRD*, and *TEK*) with high HI scores that were spanned by rare heterozygous deletions in controls. However, their occurrences are known to be extremely rare (<0.2% frequency in our controls). In contrast, there is no significant difference ( $P = 0.44$ ) in the distribution of HI scores between the genes that were intersected by duplications in cases and controls, as shown in (B).

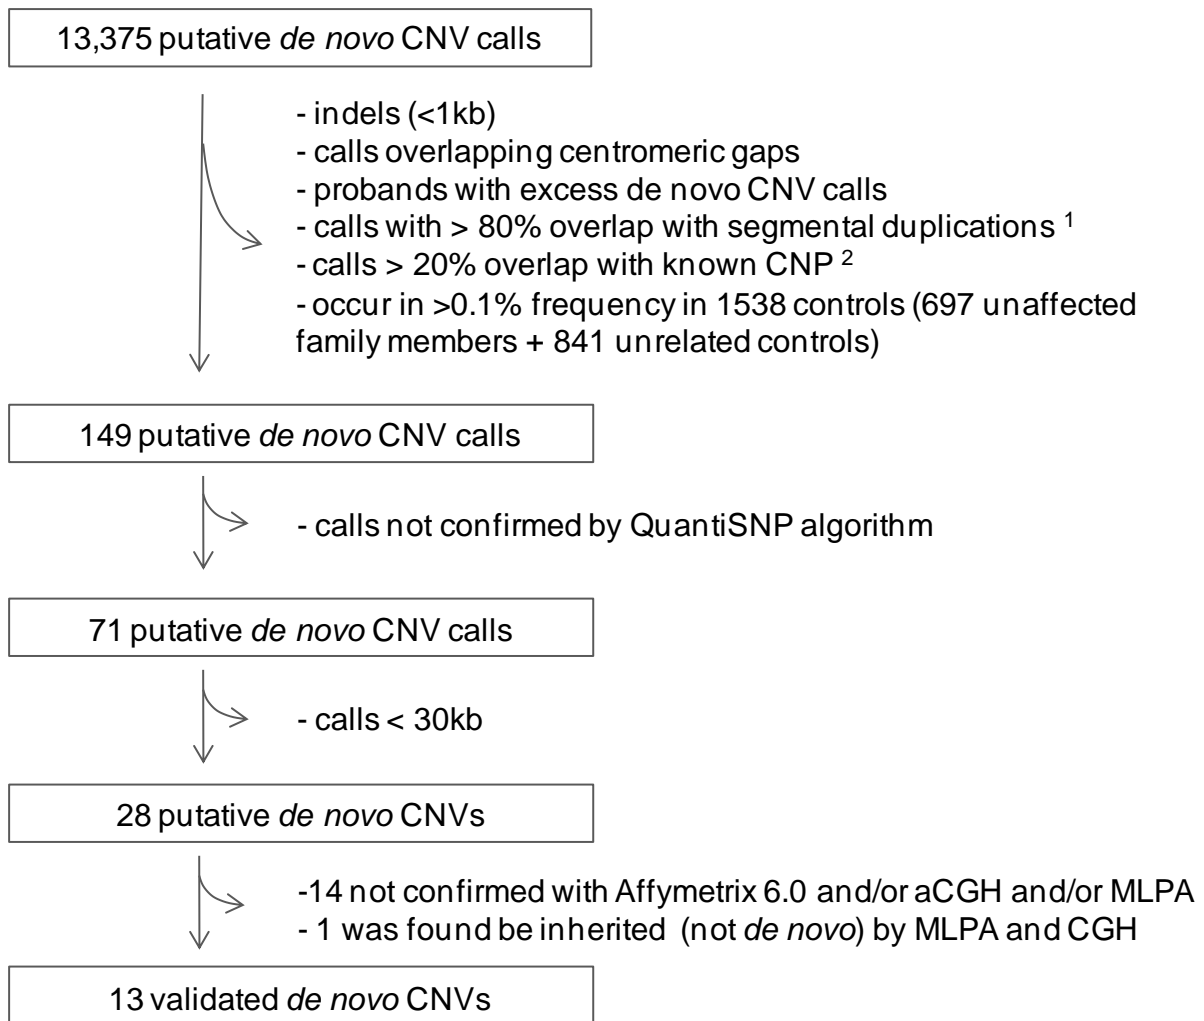

**Figure S2. Identification of Rare De Novo CNVs in 283 TOF Trios**

<sup>1</sup>Downloaded from UCSC Genome Browser

<sup>2</sup>Craddock, N., Hurles, M.E., Cardin, N., Pearson, R.D., Plagnol, V., Robson, S., Vukcevic, D., Barnes, C., Conrad, D.F., Giannoulatou, E., et al. (2010). Genome-wide association study of CNVs in 16,000 cases of eight common diseases and 3,000 shared controls. Nature 464, 713-720.

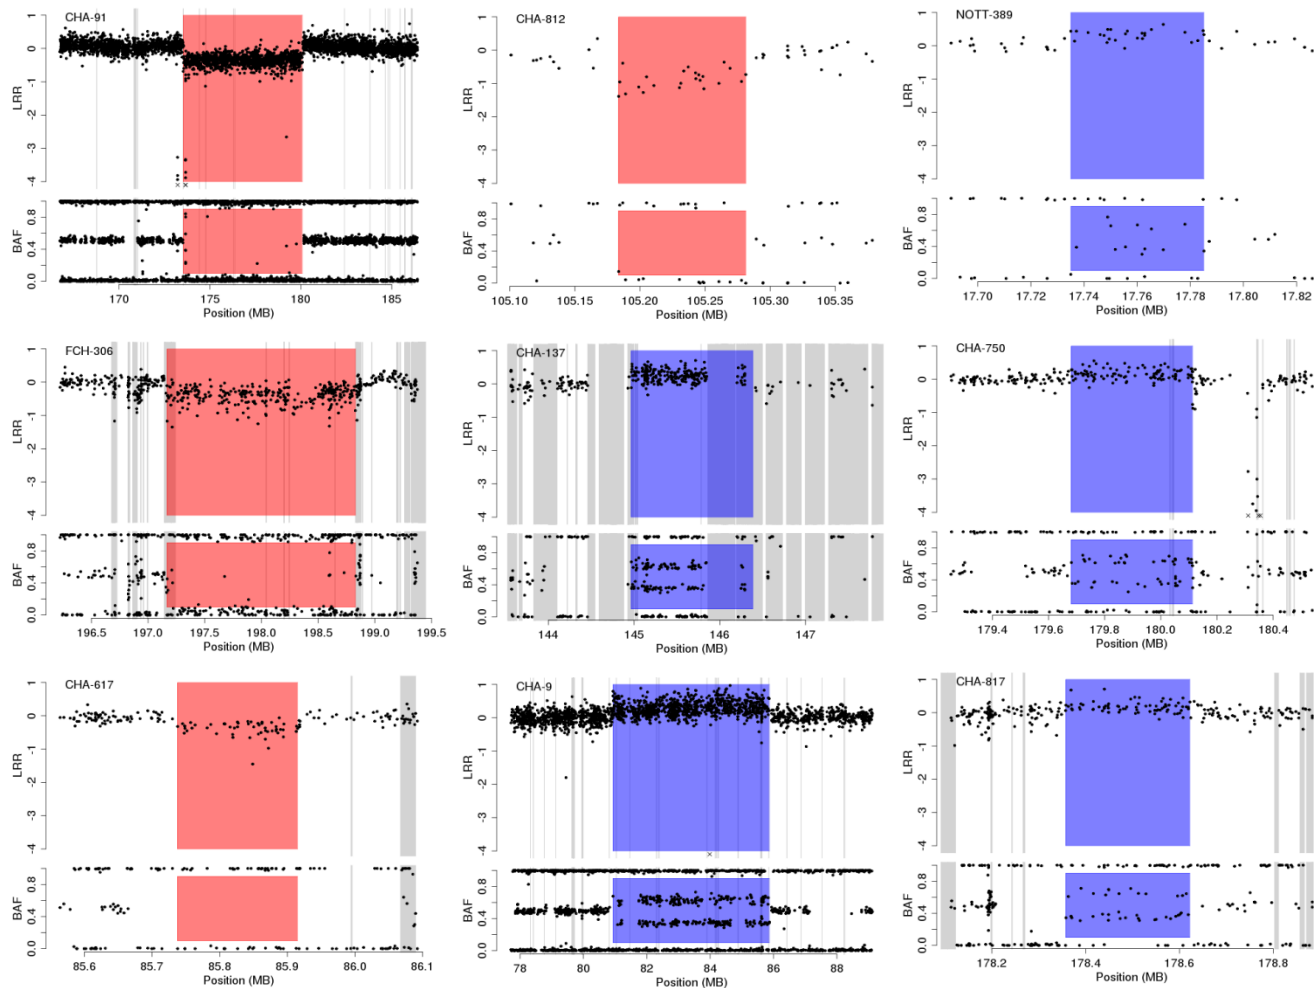

**Figure S3. Raw Intensity Data of Paternally Derived Rare De Novo CNVs in 283 Trios**

Rare de novo deletions (red shade) and duplications (blue shade) were shown in the log R ratio (LRR) and B-allele frequency (BAF) plots. Grey shaded areas indicated the segmental duplication blocks in the region. De novo deletion of FCH-306 and de novo duplication of CHA-137 were generated via their flanking segmental duplications (SD), indicated by the location of the breakpoints that coincide with SD. There is a pair of flanking SD with high degree of homology (>95%) in the same orientation in both of these cases, thus fulfilling the requirement for the predominant SD-mediated rearrangement event. The rest of the de novo CNVs were therefore generated by non SD-mediated mechanisms.

**Table S1. Phenotype Distribution in 2,256 CHD Patients**

| <b>CHD Type</b>                                            | <b>n</b>    |
|------------------------------------------------------------|-------------|
| Aortic arch abnormalities                                  | 161         |
| Aortic valve abnormalities                                 | 127         |
| Atrial septal defect                                       | 293         |
| Atrioventricular septal defect                             | 60          |
| Common arterial trunk                                      | 22          |
| Congenitally corrected transposition of the great arteries | 36          |
| Coronary artery anomaly                                    | 2           |
| Double inlet left ventricle or right ventricle             | 23          |
| Double outlet left ventricle                               | 1           |
| Double outlet right ventricle                              | 16          |
| Ebstein malformation                                       | 14          |
| Heterotaxy                                                 | 7           |
| Hypoplastic left heart syndrome                            | 14          |
| Left isomerism                                             | 13          |
| Mitral valve abnormalities                                 | 23          |
| Other                                                      | 53          |
| Partial anomalous pulmonary venous drainage                | 12          |
| Patent ductus arteriosus                                   | 63          |
| Pulmonary atresia with intact ventricular septum           | 18          |
| Pulmonary atresia with ventricular septal defect           | 17          |
| Pulmonary stenosis                                         | 76          |
| Right isomerism                                            | 11          |
| Situs inversus/dextrocardia                                | 5           |
| Tetralogy of Fallot                                        | 808         |
| Total anomalous pulmonary venous drainage                  | 7           |
| Transposition of the great arteries                        | 165         |
| Tricuspid valve abnormalities                              | 32          |
| Univentricular heart                                       | 14          |
| Ventricular septal defect                                  | 163         |
| <b>Total</b>                                               | <b>2256</b> |

**Table S2. Regions Excluded from Analyses**

| CHR | START     | END       | COMMENT                       |
|-----|-----------|-----------|-------------------------------|
| 1   | 953726    | 1498897   | artefacts in GC-rich region   |
| 7   | 913761    | 1122949   | artefacts in GC-rich region   |
| 7   | 27087213  | 27254061  | artefacts in GC-rich region   |
| 8   | 144621302 | 144772135 | artefacts in GC-rich region   |
| 8   | 145595447 | 145728221 | artefacts in GC-rich region   |
| 9   | 138277725 | 138650091 | artefacts in GC-rich region   |
| 10  | 134885864 | 135054789 | artefacts in GC-rich region   |
| 12  | 131103204 | 131701256 | artefacts in GC-rich region   |
| 16  | 956057    | 1132214   | artefacts in GC-rich region   |
| 17  | 76704184  | 77138316  | artefacts in GC-rich region   |
| 19  | 748078    | 943903    | artefacts in GC-rich region   |
| 21  | 45644509  | 45788806  | artefacts in GC-rich region   |
| 2   | 89078673  | 89855977  | low validation rate due to SD |
| 14  | 105079689 | 105945405 | low validation rate due to SD |

CHR = chromosome; SD = segmental duplications

**Table S3. Recurrent Genes Spanned by Rare Deletions**

| Cytoband | RefSeq Gene      | CHD (n = 2,256) | CHD Phenotype | Controls (n = 841) | Cooper et al., 2011 <sup>1</sup> Cardio (n = 575) | Controls (n = 8,329) |
|----------|------------------|-----------------|---------------|--------------------|---------------------------------------------------|----------------------|
| 1p31.1   | <i>PTGER3</i>    | 1               | CAT           | 0                  | 2                                                 | 1                    |
| 1p31.1   | <i>USP33</i>     | 1               | CAT           | 0                  | 1                                                 | 0                    |
| 1p31.1   | <i>FAM73A</i>    | 1               | CAT           | 0                  | 1                                                 | 0                    |
| 1p31.1   | <i>NEXN</i>      | 1               | CAT           | 0                  | 1                                                 | 0                    |
| 1q21.1   | <i>PRKAB2</i>    | 3               | TGA, MV, ASD  | 1                  | 3                                                 | 2                    |
| 1q21.1   | <i>PDIA3P</i>    | 3               | TGA, MV, ASD  | 1                  | 3                                                 | 2                    |
| 1q21.1   | <i>FMO5</i>      | 3               | TGA, MV, ASD  | 1                  | 3                                                 | 2                    |
| 1q21.1   | <i>CHD1L</i>     | 3               | TGA, MV, ASD  | 1                  | 3                                                 | 2                    |
| 1q21.1   | <i>BCL9</i>      | 3               | TGA, MV, ASD  | 1                  | 3                                                 | 2                    |
| 1q21.1   | <i>ACP6</i>      | 3               | TGA, MV, ASD  | 1                  | 3                                                 | 2                    |
| 1q21.1   | <i>GJA5</i>      | 3               | TGA, MV, ASD  | 1                  | 3                                                 | 2                    |
| 1q21.1   | <i>GJA8</i>      | 3               | TGA, MV, ASD  | 1                  | 3                                                 | 2                    |
| 1q44     | <i>OR14A16</i>   | 1               | TOF           | 0                  | 1                                                 | 4                    |
| 1q44     | <i>OR11L1</i>    | 1               | TOF           | 0                  | 1                                                 | 2                    |
| 1q44     | <i>TRIM58</i>    | 1               | TOF           | 0                  | 1                                                 | 2                    |
| 1q44     | <i>OR2W3</i>     | 1               | TOF           | 0                  | 1                                                 | 3                    |
| 2p22.1   | <i>SLC8A1</i>    | 1               | TOF           | 0                  | 1                                                 | 0                    |
| 2q13     | <i>MIR4267</i>   | 1               | CoA           | 0                  | 2                                                 | 2                    |
| 2q13     | <i>BUB1</i>      | 1               | TOF           | 0                  | 2                                                 | 2                    |
| 2q13     | <i>ACOXL</i>     | 2               | TOF, ASD      | 0                  | 2                                                 | 1                    |
| 2q13     | <i>BCL2L11</i>   | 2               | TOF, ASD      | 0                  | 2                                                 | 1                    |
| 2q13     | <i>MERTK</i>     | 1               | TOF           | 0                  | 2                                                 | 3                    |
| 2q13     | <i>TMEM87B</i>   | 1               | TOF           | 0                  | 2                                                 | 1                    |
| 2q13     | <i>FBLN7</i>     | 1               | TOF           | 0                  | 2                                                 | 2                    |
| 2q13     | <i>ZC3H8</i>     | 1               | TOF           | 0                  | 2                                                 | 1                    |
| 3p22.1   | <i>ULK4</i>      | 3               | TOF, ASD, VSD | 0                  | 0                                                 | 7                    |
| 3p14.2   | <i>FHIT</i>      | 3               | TOF, VSD(2)   | 0                  | 0                                                 | 8                    |
| 3q25     | <i>MME</i>       | 2               | TOF, VSD      | 0                  | 0                                                 | 0                    |
| 4q34.1   | <i>GALNT7</i>    | 1               | TOF           | 0                  | 1                                                 | 0                    |
| 4q34.1   | <i>HMGB2</i>     | 1               | TOF           | 0                  | 1                                                 | 0                    |
| 4q34.1   | <i>SAP30</i>     | 1               | TOF           | 0                  | 1                                                 | 0                    |
| 4q34.1   | <i>SCRG1</i>     | 1               | TOF           | 0                  | 1                                                 | 0                    |
| 4q34.1   | <i>HAND2</i>     | 1               | TOF           | 0                  | 1                                                 | 0                    |
| 4q34.1   | <i>NBLA00301</i> | 1               | TOF           | 0                  | 1                                                 | 0                    |
| 4q34.1   | <i>FBXO8</i>     | 1               | TOF           | 0                  | 1                                                 | 0                    |
| 4q35.2   | <i>LOC401164</i> | 2               | TOF(2)        | 0                  | 0                                                 | 11                   |
| 5p15.33  | <i>AHRR</i>      | 1               | AVSD          | 0                  | 1                                                 | 1                    |
| 5p15.33  | <i>C5orf55</i>   | 1               | AVSD          | 0                  | 1                                                 | 0                    |
| 5p15.33  | <i>EXOC3</i>     | 1               | AVSD          | 0                  | 1                                                 | 0                    |
| 5p15.33  | <i>SLC9A3</i>    | 1               | AVSD          | 0                  | 1                                                 | 13                   |
| 5p14.3   | <i>CDH18</i>     | 1               | TOF           | 0                  | 1                                                 | 2                    |
| 5q31.3   | <i>PCDHB2</i>    | 2               | ASD, VSD      | 0                  | 0                                                 | 1                    |
| 5q31.3   | <i>PCDHB3</i>    | 2               | ASD, VSD      | 0                  | 0                                                 | 2                    |
| 5q31.3   | <i>PCDHB4</i>    | 2               | ASD, VSD      | 0                  | 0                                                 | 1                    |
| 5q31.3   | <i>PCDHB5</i>    | 2               | ASD, VSD      | 0                  | 0                                                 | 1                    |
| 5q31.3   | <i>PCDHB6</i>    | 2               | ASD, VSD      | 0                  | 0                                                 | 2                    |
| 5q31.3   | <i>PCDHB17</i>   | 2               | ASD, VSD      | 0                  | 0                                                 | 1                    |
| 5q31.3   | <i>PCDHB16</i>   | 2               | ASD, VSD      | 0                  | 0                                                 | 2                    |
| 5q31.3   | <i>PCDHB9</i>    | 2               | ASD, VSD      | 0                  | 0                                                 | 2                    |
| 5q31.3   | <i>PCDHB10</i>   | 2               | ASD, VSD      | 0                  | 0                                                 | 2                    |
| 7p22.2   | <i>SDK1</i>      | 1               | TOF           | 0                  | 1                                                 | 9                    |
| 8p23.3   | <i>CLN8</i>      | 1               | AVSD          | 0                  | 1                                                 | 4                    |
| 8p23.3   | <i>MIR596</i>    | 1               | AVSD          | 0                  | 1                                                 | 2                    |

|         |                  |   |                   |   |   |    |
|---------|------------------|---|-------------------|---|---|----|
| 8p23.3  | <i>ARHGEF10</i>  | 1 | AVSD              | 0 | 1 | 3  |
| 8p23.3  | <i>KBTBD11</i>   | 1 | AVSD              | 0 | 1 | 9  |
| 8p23.3  | <i>MYOM2</i>     | 1 | AVSD              | 0 | 1 | 14 |
| 8p23.2  | <i>CSMD1</i>     | 1 | AVSD              | 0 | 2 | 6  |
| 8p23.1  | <i>MCPH1</i>     | 2 | TOF, AVSD         | 0 | 1 | 0  |
| 8p23.1  | <i>ANGPT2</i>    | 1 | TOF, AVSD         | 0 | 1 | 0  |
| 8p23.1  | <i>AGPAT5</i>    | 2 | TOF, AVSD         | 0 | 1 | 0  |
| 8p23.1  | <i>XKR5</i>      | 2 | TOF, AVSD         | 0 | 1 | 0  |
| 8p23.1  | <i>DEFB1</i>     | 2 | TOF, AVSD         | 0 | 1 | 1  |
| 8p23.1  | <i>DEFA6</i>     | 2 | TOF, AVSD         | 0 | 1 | 0  |
| 8p23.1  | <i>DEFA4</i>     | 2 | TOF, AVSD         | 0 | 1 | 6  |
| 8p23.1  | <i>DEFA10P</i>   | 2 | TOF, AVSD         | 0 | 1 | 1  |
| 8p23.1  | <i>DEFA1B</i>    | 1 | AVSD              | 0 | 1 | 1  |
| 8p23.1  | <i>DEFA3</i>     | 1 | AVSD              | 0 | 1 | 1  |
| 8p23.1  | <i>DEFA1</i>     | 1 | AVSD              | 0 | 1 | 1  |
| 8p23.1  | <i>DEFA5</i>     | 1 | AVSD              | 0 | 1 | 0  |
| 8p23.1  | <i>SGK223</i>    | 3 | TOF, AVSD, BAV    | 0 | 2 | 3  |
| 8p23.1  | <i>CLDN23</i>    | 3 | TOF, AVSD, BAV    | 0 | 3 | 0  |
| 8p23.1  | <i>MFHAS1</i>    | 3 | TOF, AVSD, BAV    | 0 | 3 | 9  |
| 8p23.1  | <i>ERI1</i>      | 3 | TOF, AVSD, BAV    | 0 | 2 | 1  |
| 8p23.1  | <i>TNKS</i>      | 3 | TOF, AVSD, BAV    | 0 | 3 | 0  |
| 8p23.1  | <i>MIR597</i>    | 2 | TOF, AVSD         | 0 | 3 | 0  |
| 8p23.1  | <i>LOC157627</i> | 2 | TOF, AVSD         | 0 | 3 | 0  |
| 8p23.1  | <i>MIR124-1</i>  | 2 | TOF, AVSD         | 0 | 3 | 0  |
| 8p23.1  | <i>MSRA</i>      | 2 | TOF, AVSD         | 0 | 3 | 4  |
| 8p23.1  | <i>PRSS55</i>    | 2 | TOF, AVSD         | 0 | 3 | 1  |
| 8p23.1  | <i>RP1L1</i>     | 2 | TOF, AVSD         | 0 | 3 | 1  |
| 8p23.1  | <i>MIR4286</i>   | 2 | TOF, AVSD         | 0 | 3 | 0  |
| 8p23.1  | <i>C8orf74</i>   | 2 | TOF, AVSD         | 0 | 3 | 2  |
| 8p23.1  | <i>SOX7</i>      | 2 | TOF, AVSD         | 0 | 3 | 0  |
| 8p23.1  | <i>PINX1</i>     | 2 | TOF, AVSD         | 0 | 3 | 0  |
| 8p23.1  | <i>MIR1322</i>   | 2 | TOF, AVSD         | 0 | 3 | 0  |
| 8p23.1  | <i>XKR6</i>      | 2 | TOF, AVSD         | 0 | 3 | 0  |
| 8p23.1  | <i>MIR598</i>    | 2 | TOF, AVSD         | 0 | 3 | 0  |
| 8p23.1  | <i>MTMR9</i>     | 2 | TOF, AVSD         | 0 | 3 | 0  |
| 8p23.1  | <i>TDH</i>       | 2 | TOF, AVSD         | 0 | 3 | 0  |
| 8p23.1  | <i>C8orf12</i>   | 3 | TOF, AVSD, VSD    | 0 | 3 | 1  |
| 8p23.1  | <i>FAM167A</i>   | 3 | TOF, AVSD, VSD    | 0 | 3 | 1  |
| 8p23.1  | <i>BLK</i>       | 3 | TOF, AVSD, VSD    | 0 | 3 | 0  |
| 8p23.1  | <i>GATA4</i>     | 4 | TOF(2), AVSD, VSD | 0 | 3 | 0  |
| 8p23.1  | <i>NEIL2</i>     | 4 | TOF(2), AVSD, VSD | 0 | 3 | 0  |
| 8p23.1  | <i>FDFT1</i>     | 4 | TOF(2), AVSD, VSD | 0 | 3 | 0  |
| 8p23.1  | <i>CTSB</i>      | 4 | TOF(2), AVSD, VSD | 0 | 3 | 0  |
| 8p23.1  | <i>DEFB136</i>   | 2 | TOF, AVSD         | 0 | 1 | 0  |
| 8p23.1  | <i>DEFB135</i>   | 2 | TOF, AVSD         | 0 | 1 | 0  |
| 8p23.1  | <i>DEFB134</i>   | 2 | TOF, AVSD         | 0 | 1 | 0  |
| 10q22.3 | <i>SFTPD</i>     | 1 | Other             | 0 | 1 | 2  |
| 10q22.3 | <i>LOC219347</i> | 1 | Other             | 0 | 1 | 1  |
| 10q22.3 | <i>ANXA11</i>    | 1 | Other             | 0 | 1 | 1  |
| 10q23.1 | <i>MAT1A</i>     | 1 | Other             | 0 | 1 | 0  |
| 10q23.1 | <i>DYDC1</i>     | 1 | Other             | 0 | 1 | 0  |
| 10q23.1 | <i>DYDC2</i>     | 1 | Other             | 0 | 1 | 0  |
| 10q23.1 | <i>C10orf58</i>  | 1 | Other             | 0 | 1 | 0  |
| 10q23.1 | <i>TSPAN14</i>   | 1 | Other             | 0 | 1 | 3  |



|         |                 |    |                                                       |   |   |    |
|---------|-----------------|----|-------------------------------------------------------|---|---|----|
| 10q23.1 | <i>SH2D4B</i>   | 1  | Other                                                 | 0 | 1 | 0  |
| 10q23.1 | <i>NRG3</i>     | 2  | ASD, Other                                            | 0 | 1 | 6  |
| 10q23.1 | <i>GHITM</i>    | 2  | ASD, Other                                            | 0 | 0 | 0  |
| 10q23.1 | <i>C10orf99</i> | 2  | ASD, Other                                            | 0 | 0 | 0  |
| 10q23.1 | <i>CDHR1</i>    | 2  | ASD, Other                                            | 0 | 0 | 1  |
| 10q23.1 | <i>LRIT2</i>    | 2  | ASD, Other                                            | 0 | 0 | 0  |
| 10q23.1 | <i>LRIT1</i>    | 2  | ASD, Other                                            | 0 | 0 | 0  |
| 10q23.1 | <i>RGR</i>      | 2  | ASD, Other                                            | 0 | 0 | 0  |
| 10q26.3 | <i>C10orf93</i> | 2  | AVSD, TGA                                             | 0 | 1 | 1  |
| 10q26.3 | <i>GPR123</i>   | 1  | AVSD                                                  | 0 | 1 | 4  |
| 10q26.3 | <i>CYP2E1</i>   | 2  | AVSD, ASD                                             | 0 | 0 | 6  |
| 10q26.3 | <i>SYCE1</i>    | 2  | AVSD, ASD                                             | 0 | 0 | 12 |
| 11p15.4 | <i>OR52R1</i>   | 2  | TOF, VSD                                              | 0 | 0 | 14 |
| 11p15.4 | <i>OR51F2</i>   | 2  | TOF, VSD                                              | 0 | 0 | 14 |
| 11p15.4 | <i>OR51S1</i>   | 2  | TOF, VSD                                              | 0 | 0 | 14 |
| 11p15.4 | <i>OR51T1</i>   | 2  | TOF, VSD                                              | 0 | 0 | 11 |
| 11q13.1 | <i>MACROD1</i>  | 2  | TGA, AVSD                                             | 0 | 0 | 2  |
| 11q13.1 | <i>FLRT1</i>    | 2  | TGA, AVSD                                             | 0 | 0 | 0  |
| 11q13.1 | <i>STIP1</i>    | 2  | TGA, AVSD                                             | 0 | 1 | 4  |
| 11q13.1 | <i>FERMT3</i>   | 2  | TGA, AVSD                                             | 0 | 1 | 4  |
| 11q13.1 | <i>TRPT1</i>    | 2  | TGA, AVSD                                             | 0 | 1 | 4  |
| 11q13.1 | <i>NUDT22</i>   | 2  | TGA, AVSD                                             | 0 | 1 | 4  |
| 11q13.1 | <i>DNAJC4</i>   | 2  | TGA, AVSD                                             | 0 | 1 | 9  |
| 11q13.1 | <i>VEGFB</i>    | 2  | TGA, AVSD                                             | 0 | 1 | 10 |
| 11q13.1 | <i>FKBP2</i>    | 2  | TGA, AVSD                                             | 0 | 1 | 4  |
| 11q13.1 | <i>PPP1R14B</i> | 2  | TGA, AVSD                                             | 0 | 0 | 4  |
| 11q13.1 | <i>PLCB3</i>    | 2  | TGA, AVSD                                             | 0 | 0 | 4  |
| 11q13.1 | <i>BAD</i>      | 2  | TGA, AVSD                                             | 0 | 0 | 3  |
| 11q13.1 | <i>GPR137</i>   | 2  | TGA, AVSD                                             | 0 | 0 | 2  |
| 11q13.1 | <i>KCNK4</i>    | 2  | TGA, AVSD                                             | 0 | 0 | 2  |
| 11q13.1 | <i>C11orf20</i> | 2  | TGA, AVSD                                             | 0 | 0 | 2  |
| 11q13.1 | <i>TRMT112</i>  | 2  | TGA, AVSD                                             | 0 | 0 | 2  |
| 11q13.1 | <i>PRDX5</i>    | 2  | TGA, AVSD                                             | 0 | 0 | 2  |
| 11q13.1 | <i>CCDC88B</i>  | 2  | TGA, AVSD                                             | 0 | 0 | 2  |
| 13q34   | <i>RASA3</i>    | 1  | TGA                                                   | 0 | 1 | 11 |
| 15q11.2 | <i>TUBGCP5</i>  | 12 | CoA(3), VSD(2),<br>ASD(2), L-sided<br>(3), TOF, TAPVD | 0 | 6 | 22 |
| 15q11.2 | <i>CYFIP1</i>   | 12 | CoA(3), VSD(2),<br>ASD(2), L-sided<br>(3), TOF, TAPVD | 0 | 6 | 21 |
| 15q11.2 | <i>NIPA2</i>    | 12 | CoA(3), VSD(2),<br>ASD(2), L-sided<br>(3), TOF, TAPVD | 0 | 6 | 19 |
| 15q11.2 | <i>NIPA1</i>    | 12 | CoA(3), VSD(2),<br>ASD(2), L-sided<br>(3), TOF, TAPVD | 0 | 6 | 19 |
| 15q13.3 | <i>FAN1</i>     | 2  | IL, PDA                                               | 0 | 2 | 0  |
| 15q13.3 | <i>MTMR10</i>   | 2  | IL, PDA                                               | 0 | 2 | 0  |
| 15q13.3 | <i>TRPM1</i>    | 2  | IL, PDA                                               | 0 | 2 | 7  |
| 15q13.3 | <i>MIR211</i>   | 2  | IL, PDA                                               | 0 | 2 | 7  |
| 15q13.3 | <i>CHRNA7</i>   | 3  | IL, PDA, PS                                           | 0 | 2 | 4  |
| 16p12.1 | <i>UQCRC2</i>   | 1  | TOF                                                   | 0 | 1 | 3  |
| 16p12.1 | <i>PDZD9</i>    | 1  | TOF                                                   | 0 | 2 | 3  |
| 16p12.1 | <i>C16orf52</i> | 1  | TOF                                                   | 0 | 2 | 3  |

|                     |              |   |              |   |    |   |
|---------------------|--------------|---|--------------|---|----|---|
| 16p12.1             | VWA3A        | 1 | TOF          | 0 | 2  | 3 |
| 16p12.1             | EEF2K        | 1 | TOF          | 0 | 2  | 3 |
| 16p12.1             | POLR3E       | 1 | TOF          | 0 | 2  | 3 |
| 16p12.1             | CDR2         | 1 | TOF          | 0 | 2  | 3 |
| 16q23.1             | WWOX         | 2 | CoA(2)       | 0 | 0  | 6 |
| 16q24.3             | FANCA        | 2 | PS, BAV      | 0 | 0  | 2 |
| 16q24.3             | SPIRE2       | 3 | PS, BAV, ASD | 0 | 0  | 9 |
| 16q24.3             | TCF25        | 3 | PS, BAV, ASD | 0 | 0  | 3 |
| 16q24.3             | MC1R         | 2 | PS, ASD      | 0 | 0  | 1 |
| 16q24.3             | TUBB3        | 2 | PS, ASD      | 0 | 0  | 1 |
| 16q24.3             | DEF8         | 2 | PS, ASD      | 0 | 0  | 3 |
| 18q23               | ATP9B        | 2 | TGA, CCTGA   | 0 | 1  | 2 |
| 18q23               | NFATC1       | 2 | TGA, CCTGA   | 0 | 1  | 9 |
| 22q11.21            | DGCR10       | 1 | ASD          | 0 | 16 | 2 |
| 22q11.21            | ZNF74        | 1 | VSD          | 0 | 10 | 0 |
| 22q11.21            | SCARF2       | 1 | VSD          | 0 | 10 | 0 |
| 22q11.21            | KLHL22       | 1 | VSD          | 0 | 10 | 0 |
| 22q11.21            | MED15        | 1 | VSD          | 0 | 10 | 0 |
| 22q11.21            | PI4KA        | 1 | VSD          | 0 | 10 | 1 |
| 22q11.21            | SERPIND1     | 1 | VSD          | 0 | 10 | 1 |
| 22q11.21            | SNAP29       | 1 | VSD          | 0 | 10 | 1 |
| 22q11.21            | CRKL         | 1 | VSD          | 0 | 10 | 1 |
| 22q11.21            | AIFM3        | 1 | VSD          | 0 | 10 | 1 |
| 22q11.21            | LZTR1        | 1 | VSD          | 0 | 10 | 1 |
| 22q11.21            | THAP7        | 1 | VSD          | 0 | 10 | 1 |
| 22q11.21            | FLJ39582     | 1 | VSD          | 0 | 10 | 1 |
| 22q11.21            | P2RX6        | 1 | VSD          | 0 | 10 | 1 |
| 22q11.21            | SLC7A4       | 1 | VSD          | 0 | 10 | 1 |
| 22q11.22-<br>q11.23 | RTDR1        | 1 | CAT          | 0 | 2  | 1 |
| 22q11.22            | GNAZ         | 1 | CAT          | 0 | 2  | 0 |
| 22q13.31            | LOC100271722 | 1 | AS           | 0 | 1  | 0 |
| 22q13.31            | C22orf26     | 1 | AS           | 0 | 1  | 0 |
| 22q13.31            | LOC150381    | 1 | AS           | 0 | 1  | 0 |
| 22q13.31            | MIRLET7A3    | 1 | AS           | 0 | 1  | 0 |
| 22q13.31            | MIRLET7B     | 1 | AS           | 0 | 1  | 0 |

AS = Aortic valve stenosis, ASD = Atrial septal defect, AVSD = Atrioventricular septal defect, BAV = Bicuspid aortic valve, CAT = Truncus arteriosus, CCTGA = Congenitally corrected transposition of the great arteries, CoA = Coarctation of the aorta, IL = Left isomerism, L-sided = Complex left-sided malformation, MV = Mitral valve abnormalities, PDA = Patent ductus arteriosus, PS = Pulmonary valve stenosis, TAPVD = Total anomalous pulmonary venous drainage, TGA = Transposition of the great arteries, VSD = Ventricular septal defect.

**Table S4. Recurrent Genes Spanned by Rare Duplications**

| Cytoband     | RefSeq Gene         | CHD<br>(n = 2,256) | CHD Phenotype | Controls<br>(n = 841) | Cooper et al., 2011 <sup>1</sup><br>Cardio<br>(n = 575) | Controls<br>(n = 8,329) |
|--------------|---------------------|--------------------|---------------|-----------------------|---------------------------------------------------------|-------------------------|
| 1p36.32      | <i>ACTRT2</i>       | 1                  | TOF           | 0                     | 1                                                       | 0                       |
| 1p36.32      | <i>FLJ42875</i>     | 1                  | TOF           | 0                     | 1                                                       | 0                       |
| 1p36.32      | <i>PRDM16</i>       | 1                  | TOF           | 0                     | 1                                                       | 0                       |
| 1p36.32      | <i>MIR4251</i>      | 1                  | TOF           | 0                     | 1                                                       | 0                       |
| 1q21.1       | <i>HFE2</i>         | 2                  | TOF           | 0                     | 2                                                       | 6                       |
| 1q21.1       | <i>TXNIP</i>        | 2                  | TOF           | 0                     | 2                                                       | 6                       |
| 1q21.1       | <i>POLR3GL</i>      | 2                  | TOF           | 0                     | 2                                                       | 6                       |
| 1q21.1       | <i>ANKRD34A</i>     | 2                  | TOF           | 0                     | 2                                                       | 6                       |
| 1q21.1       | <i>LIX1L</i>        | 2                  | TOF           | 0                     | 2                                                       | 6                       |
| 1q21.1       | <i>GNRHR2</i>       | 2                  | TOF           | 0                     | 2                                                       | 6                       |
| 1q21.1       | <i>PEX11B</i>       | 2                  | TOF           | 0                     | 2                                                       | 6                       |
| 1q21.1       | <i>ITGA10</i>       | 2                  | TOF           | 0                     | 2                                                       | 6                       |
| 1q21.1       | <i>ANKRD35</i>      | 2                  | TOF           | 0                     | 2                                                       | 6                       |
| 1q21.1       | <i>PIAS3</i>        | 2                  | TOF           | 0                     | 2                                                       | 6                       |
| 1q21.1       | <i>NUDT17</i>       | 2                  | TOF           | 0                     | 2                                                       | 6                       |
| 1q21.1       | <i>POLR3C</i>       | 2                  | TOF           | 0                     | 2                                                       | 6                       |
| 1q21.1       | <i>RNF115</i>       | 2                  | TOF           | 0                     | 3                                                       | 15                      |
| 1q21.1       | <i>CD160</i>        | 2                  | TOF           | 0                     | 2                                                       | 14                      |
| 1q21.1       | <i>PDZK1</i>        | 2                  | TOF           | 0                     | 2                                                       | 14                      |
| 1q21.1       | <i>PRKAB2</i>       | 8                  | TOF           | 0                     | 1                                                       | 0                       |
| 1q21.1       | <i>PDIA3P</i>       | 8                  | TOF           | 0                     | 1                                                       | 0                       |
| 1q21.1       | <i>FMO5</i>         | 8                  | TOF           | 0                     | 1                                                       | 2                       |
| 1q21.1       | <i>CHD1L</i>        | 8                  | TOF           | 0                     | 1                                                       | 2                       |
| 1q21.1       | <i>BCL9</i>         | 8                  | TOF           | 0                     | 1                                                       | 1                       |
| 1q21.1       | <i>ACP6</i>         | 10                 | TOF           | 0                     | 1                                                       | 1                       |
| 1q21.1       | <i>GJA5</i>         | 12                 | TOF(11), PA   | 0                     | 1                                                       | 3                       |
| 1q21.1       | <i>GJA8</i>         | 10                 | TOF           | 0                     | 1                                                       | 2                       |
| 2p21         | <i>UNQ6975</i>      | 1                  | DORV          | 0                     | 1                                                       | 1                       |
| 2p21         | <i>SRBD1</i>        | 1                  | DORV          | 0                     | 1                                                       | 2                       |
| 2p21         | <i>PRKCE</i>        | 1                  | DORV          | 0                     | 1                                                       | 1                       |
| 2p16.3       | <i>NRXN1</i>        | 1                  | TGA           | 0                     | 1                                                       | 0                       |
| 3p14.2       | <i>FHIT</i>         | 2                  | HLHS, ASD     | 0                     | 0                                                       | 3                       |
| 3q29         | <i>TFRC</i>         | 1                  | VSD           | 0                     | 1                                                       | 1                       |
| 3q29         | <i>LOC401109</i>    | 1                  | VSD           | 0                     | 1                                                       | 2                       |
| 3q29         | <i>ZDHHC19</i>      | 1                  | VSD           | 0                     | 1                                                       | 1                       |
| 3q29         | <i>OSTalpha</i>     | 1                  | VSD           | 0                     | 1                                                       | 1                       |
| 3q29         | <i>PCYT1A</i>       | 1                  | VSD           | 0                     | 1                                                       | 1                       |
| 3q29         | <i>TCTEX1D2</i>     | 1                  | VSD           | 0                     | 1                                                       | 1                       |
| 4q22.1       | <i>FAM190A</i>      | 2                  | ASD, PDA      | 0                     | 1                                                       | 4                       |
| 4q22.1-q22.2 | <i>GRID2</i>        | 1                  | ASD           | 0                     | 1                                                       | 2                       |
| 6q12         | <i>EYS</i>          | 1                  | CoA           | 0                     | 1                                                       | 5                       |
| 7q36.2       | <i>DPP6</i>         | 1                  | TOF           | 0                     | 1                                                       | 8                       |
| 7q36.2       | <i>LOC100132707</i> | 1                  | TOF           | 0                     | 1                                                       | 0                       |
| 7q36.2       | <i>PAXIP1</i>       | 1                  | TOF           | 0                     | 1                                                       | 0                       |
| 7q36.2       | <i>LOC202781</i>    | 1                  | TOF           | 0                     | 1                                                       | 0                       |
| 7q36.2       | <i>HTR5A</i>        | 1                  | TOF           | 0                     | 1                                                       | 0                       |
| 8p23.2       | <i>CSMD1</i>        | 1                  | ASD           | 0                     | 1                                                       | 6                       |
| 8p23.1       | <i>ERI1</i>         | 1                  | TOF           | 0                     | 1                                                       | 0                       |
| 8p23.1       | <i>PPP1R3B</i>      | 1                  | TOF           | 0                     | 1                                                       | 0                       |
| 8p23.1       | <i>TNKS</i>         | 1                  | TOF           | 0                     | 1                                                       | 0                       |
| 8p23.1       | <i>MIR597</i>       | 1                  | TOF           | 0                     | 1                                                       | 0                       |
| 8p23.1       | <i>MSRA</i>         | 1                  | BAV           | 0                     | 1                                                       | 1                       |
| 8p23.1       | <i>PRSS55</i>       | 1                  | BAV           | 0                     | 1                                                       | 1                       |
| 8p23.1       | <i>RP1L1</i>        | 1                  | BAV           | 0                     | 1                                                       | 1                       |
| 8p23.1       | <i>MIR4286</i>      | 1                  | BAV           | 0                     | 1                                                       | 1                       |

|          |                  |   |                                    |   |   |    |
|----------|------------------|---|------------------------------------|---|---|----|
| 8p23.1   | <i>C8orf74</i>   | 1 | BAV                                | 0 | 1 | 0  |
| 8p23.1   | <i>SOX7</i>      | 1 | BAV                                | 0 | 1 | 0  |
| 8p23.1   | <i>PINX1</i>     | 1 | BAV                                | 0 | 1 | 0  |
| 8p23.1   | <i>MIR1322</i>   | 1 | BAV                                | 0 | 1 | 0  |
| 8p23.1   | <i>XKR6</i>      | 1 | BAV                                | 0 | 1 | 0  |
| 8p23.1   | <i>MIR598</i>    | 1 | BAV                                | 0 | 1 | 0  |
| 8p23.1   | <i>MTMR9</i>     | 1 | BAV                                | 0 | 1 | 0  |
| 8p23.1   | <i>TDH</i>       | 1 | BAV                                | 0 | 1 | 0  |
| 8p23.1   | <i>FAM167A</i>   | 1 | BAV                                | 0 | 1 | 0  |
| 8p23.1   | <i>BLK</i>       | 1 | BAV                                | 0 | 1 | 2  |
| 8p23.1   | <i>GATA4</i>     | 1 | BAV                                | 0 | 1 | 0  |
| 8p23.1   | <i>NEIL2</i>     | 2 | BAV, VSD                           | 0 | 1 | 0  |
| 8p23.1   | <i>FDFT1</i>     | 2 | BAV, VSD                           | 0 | 1 | 0  |
| 8p23.1   | <i>CTSB</i>      | 2 | BAV, VSD                           | 0 | 1 | 1  |
| 8p23.1   | <i>DEFB136</i>   | 2 | BAV, VSD                           | 0 | 0 | 2  |
| 8p23.1   | <i>DEFB135</i>   | 2 | BAV, VSD                           | 0 | 0 | 2  |
| 8p23.1   | <i>DEFB134</i>   | 2 | BAV, VSD                           | 0 | 0 | 2  |
| 8p11.21  | <i>HGSNAT</i>    | 2 | TGA                                | 0 | 0 | 6  |
| 8p11.1   | <i>POTEA</i>     | 3 | TGA, TOF, HLHS                     | 0 | 1 | 11 |
| 8q11.23  | <i>NPBWR1</i>    | 2 | AS, PDA                            | 0 | 0 | 0  |
| 8q21.3   | <i>SLC7A13</i>   | 1 | TOF                                | 0 | 2 | 3  |
| 9p24.1   | <i>KDM4C</i>     | 1 | PS                                 | 0 | 1 | 11 |
| 9q34.3   | <i>COL5A1</i>    | 1 | PS                                 | 0 | 1 | 1  |
| 10q21.3  | <i>CTNNA3</i>    | 3 | TOF, SI, ASD                       | 0 | 0 | 4  |
| 10q21.3  | <i>LRRTM3</i>    | 3 | TOF, SI, ASD                       | 0 | 0 | 0  |
| 11q14.1  | <i>MIR4300</i>   | 2 | BAV, AS                            | 0 | 0 | 2  |
| 12p13.31 | <i>CD163</i>     | 1 | TOF                                | 0 | 1 | 0  |
| 12p13.31 | <i>APOBEC1</i>   | 1 | TOF                                | 0 | 1 | 0  |
| 12p13.31 | <i>GDF3</i>      | 1 | TOF                                | 0 | 1 | 1  |
| 12p13.31 | <i>DPPA3</i>     | 1 | TOF                                | 0 | 1 | 1  |
| 12p13.31 | <i>CLEC4C</i>    | 1 | TOF                                | 0 | 1 | 0  |
| 12p13.31 | <i>NANOGNB</i>   | 1 | TOF                                | 0 | 1 | 0  |
| 12p11.1  | <i>SYT10</i>     | 8 | TOF(3), IL, PS, ASD,<br>PDA, Other | 0 | 2 | 9  |
| 13q12.11 | <i>LATS2</i>     | 1 | CoA                                | 0 | 1 | 0  |
| 13q12.11 | <i>SAP18</i>     | 1 | CoA                                | 0 | 1 | 0  |
| 13q12.11 | <i>MRP63</i>     | 1 | CoA                                | 0 | 1 | 0  |
| 15q13.3  | <i>ARHGAP11A</i> | 3 | TOF, VSD, TGA                      | 0 | 0 | 3  |
| 15q13.3  | <i>SCG5</i>      | 4 | TOF, VSD, TGA                      | 0 | 0 | 4  |
| 15q13.3  | <i>GREM1</i>     | 4 | TOF, VSD, TGA                      | 0 | 0 | 3  |
| 15q13.3  | <i>FMN1</i>      | 4 | TOF, VSD, TGA                      | 0 | 0 | 3  |
| 15q14    | <i>RYR3</i>      | 2 | TOF, TGA                           | 0 | 0 | 4  |
| 15q14    | <i>AVEN</i>      | 2 | TOF, TGA                           | 0 | 0 | 4  |
| 15q14    | <i>CHRM5</i>     | 2 | TOF, TGA                           | 0 | 0 | 3  |
| 15q14    | <i>C15orf24</i>  | 2 | TOF, TGA                           | 0 | 0 | 3  |
| 15q14    | <i>PGBD4</i>     | 2 | TOF, TGA                           | 0 | 0 | 3  |
| 15q14    | <i>C15orf29</i>  | 2 | TOF, TGA                           | 0 | 0 | 2  |
| 15q14    | <i>TMEM85</i>    | 2 | TOF, TGA                           | 0 | 0 | 2  |
| 15q14    | <i>SLC12A6</i>   | 2 | TOF, TGA                           | 0 | 0 | 2  |
| 15q25.3  | <i>AKAP13</i>    | 2 | BAV, TOF                           | 0 | 0 | 16 |
| 16p13.11 | <i>C16orf45</i>  | 2 | VSD, CoA                           | 0 | 0 | 11 |
| 16p13.11 | <i>KIAA0430</i>  | 2 | VSD, CoA                           | 0 | 0 | 12 |
| 16p13.11 | <i>NDE1</i>      | 2 | VSD, CoA                           | 0 | 0 | 12 |
| 16p13.11 | <i>MIR484</i>    | 2 | VSD, CoA                           | 0 | 0 | 12 |
| 16p13.11 | <i>MYH11</i>     | 2 | VSD, CoA                           | 0 | 0 | 12 |

|          |                 |   |          |   |   |    |
|----------|-----------------|---|----------|---|---|----|
| 16p13.11 | <i>ABCC1</i>    | 2 | VSD, CoA | 0 | 1 | 13 |
| 16p13.11 | <i>ABCC6</i>    | 2 | VSD, CoA | 0 | 1 | 13 |
| 16p12.3  | <i>XYLT1</i>    | 2 | TOF, TGA | 0 | 0 | 2  |
| 17q12    | <i>ZNHIT3</i>   | 2 | TOF, VSD | 0 | 1 | 4  |
| 17q12    | <i>MYO19</i>    | 2 | TOF, VSD | 0 | 1 | 4  |
| 17q12    | <i>PIGW</i>     | 2 | TOF, VSD | 0 | 1 | 4  |
| 17q12    | <i>GGNBP2</i>   | 2 | TOF, VSD | 0 | 1 | 4  |
| 17q12    | <i>DHRS11</i>   | 2 | TOF, VSD | 0 | 1 | 3  |
| 17q12    | <i>MRM1</i>     | 2 | TOF, VSD | 0 | 1 | 3  |
| 17q12    | <i>LHX1</i>     | 2 | TOF, VSD | 0 | 1 | 3  |
| 17q12    | <i>AATF</i>     | 2 | TOF, VSD | 0 | 1 | 3  |
| 17q12    | <i>MIR2909</i>  | 2 | TOF, VSD | 0 | 1 | 3  |
| 17q12    | <i>ACACA</i>    | 2 | TOF, VSD | 0 | 1 | 3  |
| 17q12    | <i>C17orf78</i> | 2 | TOF, VSD | 0 | 1 | 3  |
| 17q12    | <i>TADA2A</i>   | 2 | TOF, VSD | 0 | 1 | 3  |
| 17q12    | <i>DUSP14</i>   | 2 | TOF, VSD | 0 | 1 | 3  |
| 17q12    | <i>SYNRG</i>    | 2 | TOF, VSD | 0 | 1 | 3  |
| 17q12    | <i>DDX52</i>    | 2 | TOF, VSD | 0 | 1 | 3  |
| 17q12    | <i>HNF1B</i>    | 2 | TOF, VSD | 0 | 1 | 3  |
| 18p11.32 | <i>COLEC12</i>  | 2 | TOF, CoA | 0 | 0 | 5  |
| 18p11.32 | <i>CETN1</i>    | 2 | TOF, CoA | 0 | 0 | 6  |
| 18p11.32 | <i>CLUL1</i>    | 2 | TOF, CoA | 0 | 0 | 8  |
| 18q22.1  | <i>CDH19</i>    | 2 | TOF, VSD | 0 | 0 | 1  |
| 20p12.3  | <i>PLCB1</i>    | 1 | VSD      | 0 | 1 | 4  |
| 20q13.2  | <i>NFATC2</i>   | 2 | TOF, VSD | 0 | 0 | 0  |
| 20q13.2  | <i>ATP9A</i>    | 2 | TOF, VSD | 0 | 0 | 0  |
| 20q13.2  | <i>SALL4</i>    | 2 | TOF, VSD | 0 | 0 | 0  |

AS = Aortic valve stenosis, ASD = Atrial septal defect, BAV = Bicuspid aortic valve, CoA = Coarctation of the aorta, DORV = Double outlet right ventricle, HLHS = Hypoplastic left heart syndrome, IL = Left isomerism, PA = Pulmonary atresia, PDA = Patent ductus arteriosus, PS = Pulmonary valve stenosis, SI = Situs inversus, TGA = Transposition of the great arteries, VSD = Ventricular septal defect.

**Table S5. Genes with High Haploinsufficiency (HI) Scores in Rare Deletions Found in CHD Patients**

| <b>Gene Symbol</b> | <b>Gene Name</b>                                                                     | <b>HI Score</b> |
|--------------------|--------------------------------------------------------------------------------------|-----------------|
| <i>MAPK1</i>       | mitogen-activated protein kinase 1                                                   | 0.999           |
| <i>ERBB4</i>       | v-erb-a erythroblastic leukemia viral oncogene homolog 4 (avian)                     | 0.993           |
| <i>DLG1</i>        | discs, large homolog 1 (Drosophila)                                                  | 0.991           |
| <i>CTBP1</i>       | C-terminal binding protein 1                                                         | 0.99            |
| <i>BMPR1A</i>      | bone morphogenetic protein receptor, type IA; similar to ALK-3                       | 0.98            |
| <i>RPL10L</i>      | ribosomal protein L10-like                                                           | 0.975           |
| <i>NUP205</i>      | nucleoporin 205kDa                                                                   | 0.966           |
| <i>PPM1F</i>       | protein phosphatase 1F (PP2C domain containing)                                      | 0.961           |
| <i>KRR1</i>        | KRR1, small subunit (SSU) processome component, homolog (yeast)                      | 0.956           |
| <i>GATA4</i>       | GATA binding protein 4                                                               | 0.951           |
| <i>CRKL</i>        | v-crk sarcoma virus CT10 oncogene homolog (avian)-like                               | 0.943           |
| <i>HMGB2</i>       | high-mobility group box 2                                                            | 0.936           |
| <i>CDH2</i>        | cadherin 2, type 1, N-cadherin (neuronal)                                            | 0.934           |
| <i>HDAC9</i>       | histone deacetylase 9                                                                | 0.923           |
| <i>CECR6</i>       | cat eye syndrome chromosome region, candidate 6                                      | 0.9             |
| <i>PCDH7</i>       | protocadherin 7                                                                      | 0.889           |
| <i>PTBP1</i>       | polypyrimidine tract binding protein 1                                               | 0.875           |
| <i>LDB3</i>        | LIM domain binding 3                                                                 | 0.865           |
| <i>MSX1</i>        | msh homeobox 1                                                                       | 0.862           |
| <i>CALD1</i>       | caldesmon 1                                                                          | 0.836           |
| <i>PDE4B</i>       | phosphodiesterase 4B, cAMP-specific (phosphodiesterase E4 dunce homolog, Drosophila) | 0.826           |
| <i>MYH11</i>       | myosin, heavy chain 11, smooth muscle                                                | 0.823           |
| <i>LRRC4C</i>      | leucine rich repeat containing 4C                                                    | 0.817           |
| <i>PAK2</i>        | p21 protein (Cdc42/Rac)-activated kinase 2                                           | 0.815           |
| <i>THBS2</i>       | thrombospondin 2                                                                     | 0.804           |
| <i>BCL9</i>        | B-cell CLL/lymphoma 9                                                                | 0.791           |
| <i>RPS21</i>       | ribosomal protein S21                                                                | 0.79            |
| <i>MED15</i>       | mediator complex subunit 15                                                          | 0.789           |
| <i>DEPDC1B</i>     | DEP domain containing 1B                                                             | 0.786           |
| <i>STK38L</i>      | serine/threonine kinase 38 like                                                      | 0.781           |
| <i>WAPAL</i>       | wings apart-like homolog (Drosophila)                                                | 0.781           |
| <i>MME</i>         | membrane metallo-endopeptidase                                                       | 0.778           |
| <i>MTPN</i>        | myotrophin; leucine zipper protein 6                                                 | 0.772           |
| <i>PCYT1A</i>      | phosphate cytidylyltransferase 1, choline, alpha                                     | 0.768           |
| <i>GPM6A</i>       | glycoprotein M6A                                                                     | 0.766           |
| <i>FOXC1</i>       | forkhead box C1                                                                      | 0.763           |
| <i>PRKAB2</i>      | protein kinase, AMP-activated, beta 2 non-catalytic subunit                          | 0.74            |
| <i>OSBPL8</i>      | oxysterol binding protein-like 8                                                     | 0.738           |
| <i>WRNIP1</i>      | Werner helicase interacting protein 1                                                | 0.733           |
| <i>BPGM</i>        | 2,3-bisphosphoglycerate mutase                                                       | 0.725           |
| <i>TNKS</i>        | tankyrase, TRF1-interacting ankyrin-related ADP-ribose polymerase                    | 0.721           |
| <i>HAND2</i>       | heart and neural crest derivatives expressed 2                                       | 0.72            |
| <i>GADD45A</i>     | growth arrest and DNA-damage-inducible, alpha                                        | 0.719           |
| <i>STIP1</i>       | stress-induced-phosphoprotein 1                                                      | 0.717           |
| <i>USP33</i>       | ubiquitin specific peptidase 33                                                      | 0.714           |
| <i>SERPIND1</i>    | serpin peptidase inhibitor, clade D (heparin cofactor), member 1                     | 0.704           |
| <i>GPC5</i>        | glypican 5                                                                           | 0.694           |
| <i>SERBP1</i>      | SERPINE1 mRNA binding protein 1                                                      | 0.686           |
| <i>PPFIBP1</i>     | PTPRF interacting protein, binding protein 1 (liprin beta 1)                         | 0.672           |

|                   |                                                                                                               |       |
|-------------------|---------------------------------------------------------------------------------------------------------------|-------|
| <i>ZZZ3</i>       | zinc finger, ZZ-type containing 3                                                                             | 0.659 |
| <i>DNAJB4</i>     | DnaJ (Hsp40) homolog, subfamily B, member 4                                                                   | 0.652 |
| <i>CNOT4</i>      | CCR4-NOT transcription complex, subunit 4                                                                     | 0.652 |
| <i>ICMT</i>       | isoprenylcysteine carboxyl methyltransferase                                                                  | 0.651 |
| <i>SACS</i>       | spastic ataxia of Charlevoix-Saguenay (sacsin)                                                                | 0.651 |
| <i>CEP135</i>     | centrosomal protein 135kDa                                                                                    | 0.649 |
| <i>RABGGTB</i>    | Rab geranylgeranyltransferase, beta subunit                                                                   | 0.645 |
| <i>TUSC3</i>      | tumor suppressor candidate 3                                                                                  | 0.645 |
| <i>FUBP1</i>      | far upstream element (FUSE) binding protein 1                                                                 | 0.641 |
| <i>PDE6B</i>      | phosphodiesterase 6B, cGMP-specific, rod, beta                                                                | 0.638 |
| <i>KLHL22</i>     | kelch-like 22 (Drosophila)                                                                                    | 0.634 |
| <i>RGS7BP</i>     | regulator of G-protein signaling 7 binding protein                                                            | 0.629 |
| <i>SGIP1</i>      | SH3-domain GRB2-like (endophilin) interacting protein 1                                                       | 0.627 |
| <i>WSCD1</i>      | WSC domain containing 1                                                                                       | 0.622 |
| <i>HPGD</i>       | hydroxyprostaglandin dehydrogenase 15-(NAD)                                                                   | 0.622 |
| <i>WWOX</i>       | WW domain containing oxidoreductase                                                                           | 0.616 |
| <i>LRRTM1</i>     | leucine rich repeat transmembrane neuronal 1                                                                  | 0.613 |
| <i>EXOC2</i>      | exocyst complex component 2                                                                                   | 0.612 |
| <i>ZDHHC17</i>    | zinc finger, DHHC-type containing 17                                                                          | 0.611 |
| <i>PCDH17</i>     | protocadherin 17                                                                                              | 0.608 |
| <i>MSH3</i>       | mutS homolog 3 (E. coli)                                                                                      | 0.605 |
| <i>SNTB1</i>      | syntrophin, beta 1 (dystrophin-associated protein A1, 59kDa, basic component 1)                               | 0.605 |
| <i>PLCB3</i>      | phospholipase C, beta 3 (phosphatidylinositol-specific)                                                       | 0.6   |
| <i>DIDO1</i>      | death inducer-obliterator 1                                                                                   | 0.594 |
| <i>MSH4</i>       | mutS homolog 4 (E. coli)                                                                                      | 0.586 |
| <i>GLDC</i>       | glycine dehydrogenase (decarboxylating)                                                                       | 0.586 |
| <i>AGPAT5</i>     | 1-acylglycerol-3-phosphate O-acyltransferase 5 (lysophosphatidic acid acyltransferase, epsilon)               | 0.585 |
| <i>CDH18</i>      | cadherin 18, type 2                                                                                           | 0.585 |
| <i>NDST4</i>      | N-deacetylase/N-sulfotransferase (heparan glucosaminyl) 4                                                     | 0.584 |
| <i>STK32B</i>     | serine/threonine kinase 32B                                                                                   | 0.581 |
| <i>ESRRA</i>      | estrogen-related receptor alpha                                                                               | 0.579 |
| <i>ANKRD13C</i>   | ankyrin repeat domain 13C                                                                                     | 0.575 |
| <i>DNAJC10</i>    | DnaJ (Hsp40) homolog, subfamily C, member 10                                                                  | 0.569 |
| <i>CNOT6</i>      | CCR4-NOT transcription complex, subunit 6                                                                     | 0.565 |
| <i>MLLT3</i>      | myeloid/lymphoid or mixed-lineage leukemia (trithorax homolog, Drosophila); translocated to, 3                | 0.561 |
| <i>HAS2</i>       | hyaluronan synthase 2                                                                                         | 0.557 |
| <i>SLC7A4</i>     | solute carrier family 7 (cationic amino acid transporter, y+ system), member 4                                | 0.554 |
| <i>HOMER2</i>     | homer homolog 2 (Drosophila)                                                                                  | 0.55  |
| <i>ST6GALNAC5</i> | ST6 (alpha-N-acetyl-neuraminyl-2,3-beta-galactosyl-1,3)-N-acetylgalactosaminide alpha-2,6-sialyltransferase 5 | 0.547 |
| <i>FUS</i>        | fusion (involved in t(12;16) in malignant liposarcoma)                                                        | 0.546 |
| <i>NDE1</i>       | nudE nuclear distribution gene E homolog 1 (A. nidulans)                                                      | 0.543 |
| <i>PRDX5</i>      | peroxiredoxin 5                                                                                               | 0.54  |
| <i>KDR</i>        | kinase insert domain receptor (a type III receptor tyrosine kinase)                                           | 0.538 |
| <i>ADRM1</i>      | adhesion regulating molecule 1                                                                                | 0.534 |
| <i>PYCARD</i>     | PYD and CARD domain containing                                                                                | 0.533 |
| <i>ADAMTS1</i>    | ADAM metallopeptidase with thrombospondin type 1 motif, 1                                                     | 0.533 |
| <i>SLC27A2</i>    | solute carrier family 27 (fatty acid transporter), member 2                                                   | 0.53  |
| <i>ZC3H6</i>      | zinc finger CCCH-type containing 6                                                                            | 0.527 |
| <i>RPS6KA4</i>    | ribosomal protein S6 kinase, 90kDa, polypeptide 4                                                             | 0.525 |
| <i>EDIL3</i>      | EGF-like repeats and discoidin I-like domains 3                                                               | 0.525 |
| <i>GLRA3</i>      | glycine receptor, alpha 3                                                                                     | 0.523 |

|                 |                                                                                                      |       |
|-----------------|------------------------------------------------------------------------------------------------------|-------|
| <i>KIAA1609</i> | KIAA1609                                                                                             | 0.523 |
| <i>SNCG</i>     | synuclein, gamma (breast cancer-specific protein 1)                                                  | 0.52  |
| <i>ANGPT2</i>   | angiopoietin 2                                                                                       | 0.511 |
| <i>LRRC40</i>   | leucine rich repeat containing 40                                                                    | 0.505 |
| <i>LRFN5</i>    | leucine rich repeat and fibronectin type III domain containing 5                                     | 0.496 |
| <i>UQCRC2</i>   | ubiquinol-cytochrome c reductase core protein II                                                     | 0.491 |
| <i>ZC3H18</i>   | zinc finger CCCH-type containing 18                                                                  | 0.49  |
| <i>CLOCK</i>    | clock homolog (mouse)                                                                                | 0.49  |
| <i>TFRC</i>     | transferrin receptor (p90, CD71)                                                                     | 0.489 |
| <i>TMEM55A</i>  | transmembrane protein 55A                                                                            | 0.485 |
| <i>LRRC7</i>    | leucine rich repeat containing 7                                                                     | 0.485 |
| <i>NIPA1</i>    | non imprinted in Prader-Willi/Angelman syndrome 1                                                    | 0.483 |
| <i>KCNAB2</i>   | potassium voltage-gated channel, shaker-related subfamily, beta member 2                             | 0.481 |
| <i>AP4E1</i>    | adaptor-related protein complex 4, epsilon 1 subunit                                                 | 0.479 |
| <i>SLC8A1</i>   | solute carrier family 8 (sodium/calcium exchanger), member 1                                         | 0.478 |
| <i>LRRC33</i>   | leucine rich repeat containing 33                                                                    | 0.477 |
| <i>CTNNA2</i>   | catenin (cadherin-associated protein), alpha 2                                                       | 0.476 |
| <i>SLC35D1</i>  | solute carrier family 35 (UDP-glucuronic acid/UDP-N-acetylgalactosamine dual transporter), member D1 | 0.475 |
| <i>CSRP2</i>    | cysteine and glycine-rich protein 2                                                                  | 0.475 |
| <i>SOX7</i>     | SRY (sex determining region Y)-box 7                                                                 | 0.468 |
| <i>ASB5</i>     | ankyrin repeat and SOCS box-containing 5                                                             | 0.467 |
| <i>RNF180</i>   | ring finger protein 180                                                                              | 0.465 |
| <i>CTNND2</i>   | catenin (cadherin-associated protein), delta 2 (neural plakophilin-related arm-repeat protein)       | 0.464 |
| <i>ZNF141</i>   | zinc finger protein 141                                                                              | 0.461 |
| <i>GRID1</i>    | glutamate receptor, ionotropic, delta 1                                                              | 0.461 |
| <i>ARID3A</i>   | AT rich interactive domain 3A (BRIGHT-like)                                                          | 0.456 |
| <i>ADAMTS5</i>  | ADAM metalloproteinase with thrombospondin type 1 motif, 5                                           | 0.443 |
| <i>GNAZ</i>     | guanine nucleotide binding protein (G protein), alpha z polypeptide                                  | 0.442 |
| <i>C8orf42</i>  | chromosome 8 open reading frame 42                                                                   | 0.439 |
| <i>NECAB1</i>   | N-terminal EF-hand calcium binding protein 1                                                         | 0.437 |
| <i>PHLDA1</i>   | pleckstrin homology-like domain, family A, member 1                                                  | 0.434 |
| <i>THAP7</i>    | THAP domain containing 7                                                                             | 0.433 |
| <i>NELL2</i>    | NEL-like 2 (chicken)                                                                                 | 0.432 |
| <i>VGLL4</i>    | vestigial like 4 (Drosophila)                                                                        | 0.431 |
| <i>POLR3E</i>   | polymerase (RNA) III (DNA directed) polypeptide E (80kD)                                             | 0.424 |
| <i>GRM5</i>     | glutamate receptor, metabotropic 5                                                                   | 0.422 |
| <i>C20orf11</i> | chromosome 20 open reading frame 11                                                                  | 0.421 |
| <i>C16orf45</i> | chromosome 16 open reading frame 45                                                                  | 0.415 |
| <i>ADAMTS19</i> | ADAM metalloproteinase with thrombospondin type 1 motif, 19                                          | 0.413 |
| <i>AP3B2</i>    | adaptor-related protein complex 3, beta 2 subunit                                                    | 0.412 |
| <i>FGFRL1</i>   | fibroblast growth factor receptor-like 1                                                             | 0.411 |
| <i>VEGFC</i>    | vascular endothelial growth factor C                                                                 | 0.406 |
| <i>XKR6</i>     | XK, Kell blood group complex subunit-related family, member 6                                        | 0.405 |
| <i>VEGFB</i>    | vascular endothelial growth factor B                                                                 | 0.396 |
| <i>CYTL1</i>    | cytokine-like 1                                                                                      | 0.396 |
| <i>CHD5</i>     | chromodomain helicase DNA binding protein 5                                                          | 0.395 |
| <i>FHIT</i>     | fragile histidine triad gene                                                                         | 0.395 |

The genes with HI scores<sup>2</sup> that were above the mean of total scores in all genes hit by rare deletions in CHD patients are listed.



**Table S6. De Novo CNVs and the Mismatches from Expected Inheritance Patterns from Paternal or Maternal Chromosomes**

| Chr | Start Coordinate | Length  | Family ID | Copy Number | Mismatches for Paternal Origin | Mismatches for Maternal Origin |
|-----|------------------|---------|-----------|-------------|--------------------------------|--------------------------------|
| 4   | 173538773        | 6551325 | CHA-91    | DEL         | 0                              | 242                            |
| 3   | 197168088        | 1660486 | FCH-306   | DEL         | 0                              | 47                             |
| 16  | 85737889         | 177523  | CHA-617   | DEL         | 0                              | 13                             |
| 6   | 167037829        | 67836   | NOTT-189b | DEL         | 0                              | 9                              |
| 19  | 252619           | 52630   | CHA-767   | DEL         | 0                              | 2                              |
| 16  | 45056281         | 40613   | CHA-25    | DEL         | 0                              | 0                              |
| 22  | 31789131         | 188778  | CHA-64a   | DEL         | 5                              | 0                              |
| 3   | 105183599        | 97653   | CHA-812   | DEL         | 0                              | 6                              |
| 1   | 144967972        | 1418624 | CHA-137   | DUP         | 0*                             | 28*                            |
| 5   | 80936354         | 3045007 | CHA-9     | DUP         | 0                              | 105                            |
| 5   | 179681237        | 432453  | CHA-750   | DUP         | 0                              | 21                             |
| 5   | 178357798        | 264665  | CHA-817   | DUP         | 0                              | 27                             |
| 9   | 17735053         | 50117   | NOTT-389  | DUP         | 1                              | 5                              |

\* this proband inherited both copies of the paternal chromosome and one copy from the maternal chromosome

**Table S7. Rare Nongenic CNVs >500 kb that Are Likely to be Pathogenic**

| ID         | Phenotype                                   | Copy Number | Cytoband        | hg18 Start Coordinate | Size    |
|------------|---------------------------------------------|-------------|-----------------|-----------------------|---------|
| CHA-788.1  | Tetralogy of Fallot                         | DEL         | 4q34.1          | 174801597             | 504840  |
| SYD-1107.1 | Double inlet left ventricle                 | DUP         | 6q16.1          | 94610606              | 634130  |
| NOTT-266.1 | Coarctation of the aorta                    | DEL         | 6q16.3-q21      | 104286807             | 612781  |
| FCH-56.1   | Isomerism right                             | DEL         | 8q21.13         | 83141204              | 511096  |
| FCH-57.1   | Atrial septal defect                        | DEL         | 8q21.2-q21.13   | 83170552              | 1871607 |
| SYD-1847.1 | Atrial septal defect                        | DUP         | 8q23.2-q23.3    | 111714363             | 1470169 |
| NOTT-732.1 | Atrial septal defect                        | DUP         | 11p12           | 37046345              | 580618  |
| OX-1352.1  | Atrioventricular septal defect              | DUP         | 13q21.31-q21.32 | 63251062              | 982826  |
| FCH-10.1   | Tricuspid atresia                           | DEL         | 13q21.31        | 63330923              | 503322  |
| FCH-324.1  | Transposition of the great aorta            | DEL         | 13q21.31        | 63330923              | 503322  |
| FCH-295.1  | Partial anomalous pulmonary venous drainage | DUP         | 18q23           | 73264159              | 1408553 |
| NOTT-603.1 | Ventricular septal defect                   | DEL         | 18q23           | 73514135              | 713321  |

Above is the list of rare CNVs detected in CHD patients that do not encompass any known genes, but spanned highly conserved regions, overlapped previously predicted human heart-specific enhancer sequences<sup>3</sup>, and they were absent in our controls.

## REFERENCES

1. Cooper, G.M., Coe, B.P., Girirajan, S., Rosenfeld, J.A., Vu, T.H., Baker, C., Williams, C., Stalker, H., Hamid, R., Hannig, V., et al. (2011). A copy number variation morbidity map of developmental delay. *Nat Genet* 43, 838-846.
2. Huang, N., Lee, I., Marcotte, E.M., and Hurles, M.E. (2010). Characterising and predicting haploinsufficiency in the human genome. *PLoS Genet* 6, e1001154.
3. Narlikar, L., Sakabe, N.J., Blanski, A.A., Arimura, F.E., Westlund, J.M., Nobrega, M.A., and Ovcharenko, I. (2010). Genome-wide discovery of human heart enhancers. *Genome Res* 20, 381-392.

**Table S8. All CNVs**

| Chromosome | Start     | End       | ID      | Status | CN  | CNV Type        |
|------------|-----------|-----------|---------|--------|-----|-----------------|
| 1          | 126116    | 594171    | B00BEML | aff    | dup | common genic    |
| 1          | 126116    | 714646    | B00B111 | aff    | dup | common genic    |
| 1          | 859306    | 1303878   | B00BEGX | aff    | dup | rare genic      |
| 1          | 2703187   | 3062552   | B00B19T | aff    | dup | rare genic      |
| 1          | 5550499   | 5856823   | B009EHC | unaff  | dup | rare genic      |
| 1          | 5986242   | 6214397   | B00BE6R | aff    | del | rare genic      |
| 1          | 5987699   | 6289806   | B00BE9J | aff    | del | rare genic      |
| 1          | 6039758   | 6156160   | B00B17B | aff    | del | rare genic      |
| 1          | 24805320  | 25276370  | B00BQQR | aff    | dup | rare genic      |
| 1          | 65454131  | 78424047  | B00BEU8 | aff    | del | rare genic      |
| 1          | 71194152  | 71313591  | B00B0S8 | aff    | dup | rare genic      |
| 1          | 73633732  | 73911693  | B00AAY9 | unaff  | dup | rare nongenic   |
| 1          | 78896611  | 81646426  | B00B1CR | aff    | dup | common genic    |
| 1          | 79999498  | 80308076  | B00AAGD | unaff  | del | rare nongenic   |
| 1          | 80303364  | 81959527  | B00ABDW | unaff  | dup | common nongenic |
| 1          | 94124969  | 94323143  | B00AABG | unaff  | del | rare genic      |
| 1          | 95740345  | 96084384  | B00BE6O | aff    | dup | rare nongenic   |
| 1          | 102439976 | 102601411 | B00BEEH | aff    | del | common genic    |
| 1          | 102439976 | 102608173 | B00B0MA | aff    | del | common genic    |
| 1          | 102439976 | 102616131 | B00B0J2 | aff    | del | common genic    |
| 1          | 102439976 | 102616131 | B00BDZK | aff    | del | common genic    |
| 1          | 102439976 | 102616131 | B00BELR | aff    | del | common genic    |
| 1          | 102442898 | 102616131 | B00AB94 | unaff  | del | common genic    |

|   |           |           |         |       |     |              |
|---|-----------|-----------|---------|-------|-----|--------------|
| 1 | 103907158 | 104113235 | B00BEFL | aff   | dup | common genic |
| 1 | 103937898 | 104104873 | B00AA6P | unaff | dup | rare genic   |
| 1 | 103938774 | 104078097 | B009RKC | unaff | del | common genic |
| 1 | 103938774 | 104078097 | B00AAA3 | unaff | del | common genic |
| 1 | 103938774 | 104078097 | B00B12H | aff   | del | common genic |
| 1 | 103938774 | 104086830 | B00B152 | aff   | del | common genic |
| 1 | 103938774 | 104086830 | B00BE33 | aff   | del | common genic |
| 1 | 103938774 | 104086830 | B00BEKL | aff   | del | common genic |
| 1 | 103939210 | 104078097 | B00B0MC | aff   | del | common genic |
| 1 | 103939210 | 104078097 | B00B0ZE | aff   | del | common genic |
| 1 | 103939210 | 104086830 | B00AAAA | unaff | del | common genic |
| 1 | 103939210 | 104086830 | B00BDK0 | aff   | del | common genic |
| 1 | 103939210 | 104086830 | B00BEJK | aff   | del | common genic |
| 1 | 103939210 | 104086830 | B00BQL6 | aff   | del | common genic |
| 1 | 103939210 | 104086830 | B00BQQO | aff   | del | common genic |
| 1 | 103939210 | 104095839 | B009FWS | aff   | del | common genic |
| 1 | 103939210 | 104095839 | B00AA5X | unaff | del | common genic |
| 1 | 103940395 | 104071470 | B00B0SX | aff   | del | common genic |
| 1 | 103940395 | 104078097 | B009EF2 | unaff | del | common genic |
| 1 | 103940395 | 104078097 | B009FUM | aff   | del | common genic |
| 1 | 103940395 | 104078097 | B00AAH1 | unaff | del | common genic |
| 1 | 103940395 | 104078097 | B00B0EJ | aff   | del | common genic |
| 1 | 103940395 | 104078097 | B00B0JP | aff   | del | common genic |
| 1 | 103940395 | 104078097 | B00B0K4 | aff   | del | common genic |
| 1 | 103940395 | 104078097 | B00BDR5 | aff   | del | common genic |

|   |           |           |         |       |     |              |
|---|-----------|-----------|---------|-------|-----|--------------|
| 1 | 103940395 | 104086830 | B00B0VI | aff   | del | common genic |
| 1 | 103940816 | 104078097 | B00BEU1 | aff   | del | common genic |
| 1 | 103955289 | 104078097 | B00B0GD | aff   | del | common genic |
| 1 | 103955289 | 104078097 | B00B12N | aff   | del | common genic |
| 1 | 103955289 | 104078097 | B00BQO0 | aff   | del | common genic |
| 1 | 103955289 | 104086830 | B00B0Z6 | aff   | del | common genic |
| 1 | 103955289 | 104100767 | B00AACI | unaff | del | common genic |
| 1 | 103956295 | 104078097 | B00BQQ4 | aff   | del | common genic |
| 1 | 103967847 | 104078097 | B009EG0 | unaff | del | common genic |
| 1 | 103967847 | 104078097 | B009RKI | unaff | del | common genic |
| 1 | 103967847 | 104086830 | B00AA8O | unaff | del | common genic |
| 1 | 103967847 | 104086830 | B00AAA4 | unaff | del | common genic |
| 1 | 103967847 | 104086830 | B00B1A1 | aff   | del | common genic |
| 1 | 103967847 | 104086830 | B00BEKG | aff   | del | common genic |
| 1 | 103967847 | 104091739 | B00B12W | aff   | del | common genic |
| 1 | 103967847 | 104095839 | B00B0VQ | aff   | del | common genic |
| 1 | 103967847 | 104095839 | B00B0XV | aff   | del | common genic |
| 1 | 103967847 | 104095839 | B00B11R | aff   | del | common genic |
| 1 | 103967847 | 104095839 | B00B12T | aff   | del | common genic |
| 1 | 103967847 | 104095839 | B00BE2O | aff   | del | common genic |
| 1 | 103967847 | 104100767 | B009EFM | unaff | del | common genic |
| 1 | 103967847 | 104100767 | B009EH5 | unaff | del | common genic |
| 1 | 103967847 | 104100767 | B00AA7T | unaff | del | common genic |
| 1 | 103967847 | 104100767 | B00B0FQ | aff   | del | common genic |
| 1 | 103967847 | 104100767 | B00B0XQ | aff   | del | common genic |

|   |           |           |         |       |     |              |
|---|-----------|-----------|---------|-------|-----|--------------|
| 1 | 103967847 | 104104873 | B009FVA | aff   | del | common genic |
| 1 | 103967847 | 104104873 | B00AAAM | unaff | del | common genic |
| 1 | 103967847 | 104104873 | B00ABEM | unaff | del | common genic |
| 1 | 103967847 | 104104873 | B00B132 | aff   | del | common genic |
| 1 | 103969048 | 104078097 | B00AB2J | unaff | del | common genic |
| 1 | 103969048 | 104078097 | B00B0NZ | aff   | del | common genic |
| 1 | 103969048 | 104078097 | B00B15K | aff   | del | common genic |
| 1 | 103969048 | 104095839 | B00B12A | aff   | del | common genic |
| 1 | 103969048 | 104095839 | B00BEDO | aff   | del | common genic |
| 1 | 103969048 | 104100767 | B00ABAM | unaff | del | common genic |
| 1 | 103969048 | 104100767 | B00B0VW | aff   | del | common genic |
| 1 | 103969048 | 104100767 | B00B1CE | aff   | del | common genic |
| 1 | 103969048 | 104100767 | B00B1D3 | aff   | del | common genic |
| 1 | 103969048 | 104100767 | B00BDS6 | aff   | del | common genic |
| 1 | 103969048 | 104100767 | B00BEES | aff   | del | common genic |
| 1 | 103969048 | 104100767 | B00BEIF | aff   | del | common genic |
| 1 | 103969048 | 104100767 | B00BEUW | aff   | del | common genic |
| 1 | 103969048 | 104104873 | B00BQS3 | aff   | del | common genic |
| 1 | 103974735 | 104095839 | B00AB6T | unaff | del | common genic |
| 1 | 144106312 | 146396892 | B00B19E | aff   | dup | rare genic   |
| 1 | 144106312 | 147087790 | B00B0RM | aff   | dup | rare genic   |
| 1 | 144943150 | 146293282 | B00B0J9 | aff   | dup | rare genic   |
| 1 | 144943150 | 146293282 | B00BDUZ | aff   | dup | rare genic   |
| 1 | 144943150 | 146293282 | B00BEAH | aff   | dup | rare genic   |
| 1 | 144967972 | 145848182 | B00B0R4 | aff   | dup | rare genic   |

|   |           |           |         |       |     |               |
|---|-----------|-----------|---------|-------|-----|---------------|
| 1 | 144967972 | 146293282 | B00B0JM | aff   | dup | rare genic    |
| 1 | 144967972 | 146293282 | B00B13U | aff   | del | common genic  |
| 1 | 144967972 | 146293282 | B00BE1C | aff   | del | common genic  |
| 1 | 144967972 | 146293828 | B009FS7 | aff   | dup | rare genic    |
| 1 | 144967972 | 146386595 | B00BEGV | aff   | del | common genic  |
| 1 | 144967972 | 146395619 | B00ABBU | unaff | del | rare genic    |
| 1 | 145594226 | 145848182 | B00B0FH | aff   | dup | candidate     |
| 1 | 145594226 | 145848182 | B00BETA | aff   | dup | candidate     |
| 1 | 145658465 | 145776067 | B00BE86 | aff   | dup | rare genic    |
| 1 | 145658466 | 145776067 | B009G5V | aff   | dup | candidate     |
| 1 | 161371366 | 161550563 | B00AB6C | unaff | dup | rare genic    |
| 1 | 161944574 | 163041998 | B00BEBS | aff   | dup | rare genic    |
| 1 | 166703060 | 166967709 | B00B121 | aff   | del | rare genic    |
| 1 | 185998240 | 186445004 | B00BDJY | aff   | dup | rare nongenic |
| 1 | 187852003 | 187990246 | B00AB7I | unaff | dup | rare nongenic |
| 1 | 191721954 | 192001523 | B00B10N | aff   | dup | rare nongenic |
| 1 | 193309000 | 193760161 | B00B15A | aff   | del | rare nongenic |
| 1 | 195015067 | 195160949 | B00AAC8 | unaff | del | common genic  |
| 1 | 195015067 | 195164017 | B009EEV | unaff | del | common genic  |
| 1 | 195015067 | 195166713 | B00AA7S | unaff | del | common genic  |
| 1 | 195022923 | 195164017 | B009FND | aff   | del | common genic  |
| 1 | 195043609 | 195166713 | B009G31 | aff   | del | common genic  |
| 1 | 195048233 | 195166713 | B009FZU | aff   | del | common genic  |
| 1 | 228701490 | 228903667 | B009GAK | aff   | dup | rare genic    |
| 1 | 229014206 | 230907837 | B00BQLE | aff   | dup | rare genic    |

|   |           |           |         |       |     |                 |
|---|-----------|-----------|---------|-------|-----|-----------------|
| 1 | 231414343 | 231621476 | B00BQLE | aff   | dup | rare genic      |
| 1 | 236719591 | 236844151 | B00BDS3 | aff   | dup | common nongenic |
| 1 | 236734032 | 236846513 | B00AAGG | unaff | dup | common nongenic |
| 1 | 237681988 | 237841293 | B00BQLS | aff   | del | rare nongenic   |
| 1 | 238031933 | 238250572 | B00AAGC | unaff | dup | common genic    |
| 1 | 238069042 | 238403476 | B00B0ZJ | aff   | dup | common genic    |
| 1 | 238121712 | 238292083 | B00BET1 | aff   | dup | common genic    |
| 1 | 239093681 | 239653457 | B009EEC | unaff | dup | rare genic      |
| 1 | 246007815 | 246417399 | B00B0OZ | aff   | del | rare genic      |
| 2 | 10599696  | 10880871  | B00B1AW | aff   | dup | rare genic      |
| 2 | 32487194  | 33051984  | B009G8J | aff   | dup | common genic    |
| 2 | 32487194  | 33078177  | B009RKN | unaff | dup | common genic    |
| 2 | 32487194  | 33168424  | B00AA95 | unaff | dup | common genic    |
| 2 | 32487194  | 33168424  | B00B135 | aff   | dup | common genic    |
| 2 | 32487194  | 33181898  | B00AB4R | unaff | dup | common genic    |
| 2 | 32622855  | 32944171  | B00AB8D | unaff | dup | common genic    |
| 2 | 32636267  | 32967622  | B00AAEY | unaff | dup | common genic    |
| 2 | 32961969  | 33186442  | B00B0K4 | aff   | dup | common genic    |
| 2 | 34819242  | 34997368  | B00BDTW | aff   | del | rare nongenic   |
| 2 | 35044711  | 35279033  | B009EEC | unaff | del | rare nongenic   |
| 2 | 40075710  | 40247644  | B00BDTW | aff   | del | rare genic      |
| 2 | 43750548  | 43911571  | B009GBN | aff   | dup | rare genic      |
| 2 | 45261773  | 45827640  | B00B0WA | aff   | dup | rare genic      |
| 2 | 48632568  | 49317292  | B00B0NY | aff   | dup | rare genic      |
| 2 | 48748108  | 48894507  | B00AB5E | unaff | del | rare genic      |



|   |           |           |         |       |     |                 |
|---|-----------|-----------|---------|-------|-----|-----------------|
| 2 | 49069064  | 49206179  | B00B0YE | aff   | del | rare genic      |
| 2 | 50480772  | 51496826  | B00B0XB | aff   | dup | rare genic      |
| 2 | 50895846  | 51068497  | B00BE1P | aff   | del | rare genic      |
| 2 | 51179406  | 51502240  | B00AB0C | unaff | del | rare nongenic   |
| 2 | 52260564  | 52436270  | B00BDHX | aff   | del | rare nongenic   |
| 2 | 57058906  | 57368345  | B00B0K6 | aff   | del | rare nongenic   |
| 2 | 72324831  | 72689394  | B00B0IK | aff   | del | rare genic      |
| 2 | 75351756  | 75831043  | B009FND | aff   | dup | rare genic      |
| 2 | 75983378  | 76978726  | B00AAHC | unaff | dup | rare genic      |
| 2 | 76383089  | 76532292  | B00BDU4 | aff   | del | rare nongenic   |
| 2 | 78365050  | 78831519  | B00BEF8 | aff   | del | rare nongenic   |
| 2 | 80312812  | 80717834  | B00B0YV | aff   | del | rare genic      |
| 2 | 88241514  | 88601279  | B00BEF6 | aff   | del | rare genic      |
| 2 | 89274697  | 89739739  | B009EFQ | unaff | del | rare nongenic   |
| 2 | 89279517  | 89739739  | B00BELJ | aff   | del | common nongenic |
| 2 | 89282305  | 89739739  | B00AA83 | unaff | del | rare nongenic   |
| 2 | 89292108  | 89739739  | B00BE3P | aff   | del | common nongenic |
| 2 | 89304043  | 89739739  | B00BE18 | aff   | del | common nongenic |
| 2 | 97904865  | 98180486  | B00BELL | aff   | dup | rare genic      |
| 2 | 104460130 | 104821735 | B00BDJF | aff   | dup | rare genic      |
| 2 | 106245033 | 107812504 | B009FWJ | aff   | dup | common genic    |
| 2 | 106468850 | 107807545 | B00BQON | aff   | dup | common genic    |
| 2 | 106468850 | 112182736 | B00AAJK | unaff | dup | common genic    |
| 2 | 108880488 | 109613659 | B00BEL4 | aff   | dup | common genic    |
| 2 | 110052853 | 110631960 | B00B0WO | aff   | del | common genic    |

|   |           |           |         |       |     |                 |
|---|-----------|-----------|---------|-------|-----|-----------------|
| 2 | 110214532 | 110343093 | B00AA9D | unaff | del | rare genic      |
| 2 | 111108728 | 112815283 | B00BDUR | aff   | del | rare genic      |
| 2 | 111508664 | 112193235 | B00B13J | aff   | del | rare genic      |
| 2 | 112040114 | 112589291 | B00AAHP | unaff | dup | rare genic      |
| 2 | 151239400 | 151443401 | B00AA64 | unaff | dup | rare nongenic   |
| 2 | 176707258 | 176921341 | B009FOD | aff   | dup | rare genic      |
| 2 | 181808061 | 182182839 | B00AA7B | unaff | dup | rare genic      |
| 2 | 182883667 | 183350873 | B00BDPH | aff   | del | rare genic      |
| 2 | 188458210 | 188590986 | B00ABBY | unaff | dup | rare nongenic   |
| 2 | 212625003 | 212797340 | B00BEK5 | aff   | del | rare genic      |
| 2 | 235048683 | 236034217 | B00AAX5 | unaff | dup | rare genic      |
| 2 | 237701106 | 238118570 | B00B0FH | aff   | dup | rare genic      |
| 2 | 239497749 | 239779074 | B009FUS | aff   | dup | rare genic      |
| 2 | 239637820 | 239785685 | B00BE6R | aff   | del | rare genic      |
| 2 | 242518428 | 242653950 | B00BQL6 | aff   | del | common nongenic |
| 2 | 242518428 | 242656041 | B00AAHZ | unaff | del | rare nongenic   |
| 2 | 242518428 | 242656041 | B00BDH3 | aff   | del | common nongenic |
| 2 | 242518428 | 242671693 | B00B0WC | aff   | del | common nongenic |
| 2 | 242518428 | 242676731 | B009EC0 | unaff | del | rare nongenic   |
| 3 | 643832    | 1325458   | B00B0L6 | aff   | dup | rare genic      |
| 3 | 1122201   | 2026065   | B00BQR9 | aff   | dup | common genic    |
| 3 | 1140284   | 1635507   | B00BEST | aff   | dup | common genic    |
| 3 | 1166638   | 1428696   | B00BE15 | aff   | dup | common genic    |
| 3 | 1210201   | 1924294   | B00AAGD | unaff | dup | common genic    |
| 3 | 1329463   | 2206148   | B00BDS9 | aff   | dup | common genic    |

|   |          |          |         |       |     |                   |
|---|----------|----------|---------|-------|-----|-------------------|
| 3 | 1789351  | 2070542  | B00B1AF | aff   | del | rare nongenetic   |
| 3 | 2729032  | 3156297  | B00BDKD | aff   | dup | rare genic        |
| 3 | 3875135  | 4156750  | B00B0M8 | aff   | del | common nongenetic |
| 3 | 3961933  | 4204796  | B00AA6R | unaff | del | common nongenetic |
| 3 | 3995215  | 4160026  | B00BDUR | aff   | del | common nongenetic |
| 3 | 5707139  | 6621026  | B00BEMW | aff   | dup | common nongenetic |
| 3 | 6085764  | 6396284  | B00AAA6 | unaff | dup | rare nongenetic   |
| 3 | 7635133  | 8134754  | B00AB0D | unaff | dup | rare genic        |
| 3 | 11371562 | 11721737 | B00BEBE | aff   | del | rare genic        |
| 3 | 11705767 | 11873859 | B00B13G | aff   | dup | rare genic        |
| 3 | 15783711 | 16212012 | B00BQQY | aff   | dup | rare genic        |
| 3 | 21202723 | 21413615 | B00B0P6 | aff   | dup | rare nongenetic   |
| 3 | 21927114 | 22112444 | B00BEEG | aff   | del | rare nongenetic   |
| 3 | 22060813 | 22334170 | B00BDJF | aff   | del | rare nongenetic   |
| 3 | 41334538 | 41708091 | B00B120 | aff   | del | rare genic        |
| 3 | 41334538 | 41734529 | B009G5V | aff   | del | rare genic        |
| 3 | 41334538 | 41761013 | B00B0X6 | aff   | del | rare genic        |
| 3 | 58472819 | 60171577 | B00B0UA | aff   | dup | rare genic        |
| 3 | 59072633 | 60171577 | B009GB2 | aff   | dup | rare genic        |
| 3 | 60043770 | 60247357 | B00BE78 | aff   | del | rare genic        |
| 3 | 60043770 | 60251762 | B009G7A | aff   | del | rare genic        |
| 3 | 60439116 | 60593376 | B00BQL6 | aff   | del | rare genic        |
| 3 | 62932946 | 63189940 | B00ABAU | unaff | dup | rare genic        |
| 3 | 65379655 | 65651730 | B00AB9Z | unaff | del | rare genic        |
| 3 | 76125986 | 76308172 | B00B0J8 | aff   | dup | rare nongenetic   |

|   |           |           |         |       |     |                 |
|---|-----------|-----------|---------|-------|-----|-----------------|
| 3 | 76254922  | 77652511  | B00B0DL | aff   | dup | rare genic      |
| 3 | 80994692  | 81218465  | B00B0L7 | aff   | dup | rare nongenic   |
| 3 | 82226341  | 82582297  | B00AAWT | unaff | del | rare nongenic   |
| 3 | 83988108  | 84988507  | B00AA5R | unaff | dup | rare genic      |
| 3 | 98837719  | 99558233  | B00B0IU | aff   | dup | rare genic      |
| 3 | 109150641 | 109950509 | B00B0XW | aff   | del | rare genic      |
| 3 | 118015373 | 118655663 | B009EEH | unaff | dup | rare nongenic   |
| 3 | 119477874 | 119703701 | B00AA9J | unaff | del | rare nongenic   |
| 3 | 122616238 | 122901991 | B00B11S | aff   | dup | rare genic      |
| 3 | 129961232 | 130195068 | B00AB8W | unaff | dup | rare genic      |
| 3 | 156017230 | 156509714 | B009FQ1 | aff   | del | rare genic      |
| 3 | 156017230 | 156509714 | B00BEFE | aff   | del | rare genic      |
| 3 | 159897201 | 160108290 | B00AAHP | unaff | del | rare genic      |
| 3 | 159945795 | 160155568 | B00BEJ3 | aff   | del | common genic    |
| 3 | 162900560 | 163030338 | B00ABAG | unaff | del | common nongenic |
| 3 | 162900560 | 163030338 | B00B11B | aff   | del | common nongenic |
| 3 | 162900560 | 163030338 | B00B16F | aff   | del | common nongenic |
| 3 | 162900560 | 163030338 | B00BEJG | aff   | del | common nongenic |
| 3 | 163993833 | 164123191 | B00B1D3 | aff   | dup | rare nongenic   |
| 3 | 163995377 | 164096351 | B00AB0H | unaff | del | common nongenic |
| 3 | 163995377 | 164108060 | B009EBZ | unaff | del | common nongenic |
| 3 | 163995377 | 164108060 | B009ED5 | unaff | del | common nongenic |
| 3 | 163995377 | 164108060 | B009EE5 | unaff | del | common nongenic |
| 3 | 163995377 | 164108060 | B009EEC | unaff | del | common nongenic |
| 3 | 163995377 | 164108060 | B009EER | unaff | del | common nongenic |

|   |           |           |         |       |     |                   |
|---|-----------|-----------|---------|-------|-----|-------------------|
| 3 | 163995377 | 164108060 | B009EEX | unaff | del | common nongenetic |
| 3 | 163995377 | 164108060 | B009EFK | unaff | del | common nongenetic |
| 3 | 163995377 | 164108060 | B009EFP | unaff | del | common nongenetic |
| 3 | 163995377 | 164108060 | B009EG6 | unaff | del | common nongenetic |
| 3 | 163995377 | 164108060 | B009FNY | aff   | del | common nongenetic |
| 3 | 163995377 | 164108060 | B009FQS | aff   | del | common nongenetic |
| 3 | 163995377 | 164108060 | B009FR4 | aff   | del | common nongenetic |
| 3 | 163995377 | 164108060 | B009FZC | aff   | del | common nongenetic |
| 3 | 163995377 | 164108060 | B009G03 | aff   | del | common nongenetic |
| 3 | 163995377 | 164108060 | B009G0C | aff   | del | common nongenetic |
| 3 | 163995377 | 164108060 | B009G13 | aff   | del | common nongenetic |
| 3 | 163995377 | 164108060 | B009G2P | aff   | del | common nongenetic |
| 3 | 163995377 | 164108060 | B009G31 | aff   | del | common nongenetic |
| 3 | 163995377 | 164108060 | B009G34 | aff   | del | common nongenetic |
| 3 | 163995377 | 164108060 | B009G41 | aff   | del | common nongenetic |
| 3 | 163995377 | 164108060 | B009G76 | aff   | del | common nongenetic |
| 3 | 163995377 | 164108060 | B009G7Q | aff   | del | common nongenetic |
| 3 | 163995377 | 164108060 | B009G7R | aff   | del | common nongenetic |
| 3 | 163995377 | 164108060 | B009G7X | aff   | del | common nongenetic |
| 3 | 163995377 | 164108060 | B009G8F | aff   | del | common nongenetic |
| 3 | 163995377 | 164108060 | B009G8G | aff   | del | common nongenetic |
| 3 | 163995377 | 164108060 | B009G8M | aff   | del | common nongenetic |
| 3 | 163995377 | 164108060 | B009GBN | aff   | del | common nongenetic |
| 3 | 163995377 | 164108060 | B009RKC | unaff | del | common nongenetic |
| 3 | 163995377 | 164108060 | B009RKU | unaff | del | common nongenetic |

|   |           |           |         |       |     |                   |
|---|-----------|-----------|---------|-------|-----|-------------------|
| 3 | 163995377 | 164108060 | B009RL1 | unaff | del | common nongenetic |
| 3 | 163995377 | 164108060 | B009RL3 | unaff | del | common nongenetic |
| 3 | 163995377 | 164108060 | B009RL4 | unaff | del | common nongenetic |
| 3 | 163995377 | 164108060 | B00AA5G | unaff | del | common nongenetic |
| 3 | 163995377 | 164108060 | B00AA5N | unaff | del | common nongenetic |
| 3 | 163995377 | 164108060 | B00AA61 | unaff | del | common nongenetic |
| 3 | 163995377 | 164108060 | B00AA6B | unaff | del | common nongenetic |
| 3 | 163995377 | 164108060 | B00AA6I | unaff | del | common nongenetic |
| 3 | 163995377 | 164108060 | B00AA6W | unaff | del | common nongenetic |
| 3 | 163995377 | 164108060 | B00AA6Z | unaff | del | common nongenetic |
| 3 | 163995377 | 164108060 | B00AA77 | unaff | del | common nongenetic |
| 3 | 163995377 | 164108060 | B00AA7S | unaff | del | common nongenetic |
| 3 | 163995377 | 164108060 | B00AA8J | unaff | del | common nongenetic |
| 3 | 163995377 | 164108060 | B00AA97 | unaff | del | common nongenetic |
| 3 | 163995377 | 164108060 | B00AA9L | unaff | del | common nongenetic |
| 3 | 163995377 | 164108060 | B00AAA9 | unaff | del | common nongenetic |
| 3 | 163995377 | 164108060 | B00AAAA | unaff | del | common nongenetic |
| 3 | 163995377 | 164108060 | B00AAAJ | unaff | del | common nongenetic |
| 3 | 163995377 | 164108060 | B00AABF | unaff | del | common nongenetic |
| 3 | 163995377 | 164108060 | B00AABG | unaff | del | common nongenetic |
| 3 | 163995377 | 164108060 | B00AABJ | unaff | del | common nongenetic |
| 3 | 163995377 | 164108060 | B00AAC7 | unaff | del | common nongenetic |
| 3 | 163995377 | 164108060 | B00AACF | unaff | del | common nongenetic |
| 3 | 163995377 | 164108060 | B00AACH | unaff | del | common nongenetic |
| 3 | 163995377 | 164108060 | B00AACJ | unaff | del | common nongenetic |

|   |           |           |         |       |     |                   |
|---|-----------|-----------|---------|-------|-----|-------------------|
| 3 | 163995377 | 164108060 | B00AACR | unaff | del | common nongenetic |
| 3 | 163995377 | 164108060 | B00AACZ | unaff | del | common nongenetic |
| 3 | 163995377 | 164108060 | B00AADT | unaff | del | common nongenetic |
| 3 | 163995377 | 164108060 | B00AADZ | unaff | del | common nongenetic |
| 3 | 163995377 | 164108060 | B00AAE5 | unaff | del | common nongenetic |
| 3 | 163995377 | 164108060 | B00AAFD | unaff | del | common nongenetic |
| 3 | 163995377 | 164108060 | B00AAFG | unaff | del | common nongenetic |
| 3 | 163995377 | 164108060 | B00AAGH | unaff | del | common nongenetic |
| 3 | 163995377 | 164108060 | B00AAGJ | unaff | del | common nongenetic |
| 3 | 163995377 | 164108060 | B00AAGW | unaff | del | common nongenetic |
| 3 | 163995377 | 164108060 | B00AAH1 | unaff | del | common nongenetic |
| 3 | 163995377 | 164108060 | B00AAIU | unaff | del | common nongenetic |
| 3 | 163995377 | 164108060 | B00AAIV | unaff | del | common nongenetic |
| 3 | 163995377 | 164108060 | B00AAIY | unaff | del | common nongenetic |
| 3 | 163995377 | 164108060 | B00AAJG | unaff | del | common nongenetic |
| 3 | 163995377 | 164108060 | B00AAJN | unaff | del | common nongenetic |
| 3 | 163995377 | 164108060 | B00AAJV | unaff | del | common nongenetic |
| 3 | 163995377 | 164108060 | B00AAYA | unaff | del | common nongenetic |
| 3 | 163995377 | 164108060 | B00AAZ3 | unaff | del | common nongenetic |
| 3 | 163995377 | 164108060 | B00AAZI | unaff | del | common nongenetic |
| 3 | 163995377 | 164108060 | B00AB0S | unaff | del | common nongenetic |
| 3 | 163995377 | 164108060 | B00AB0W | unaff | del | common nongenetic |
| 3 | 163995377 | 164108060 | B00AB0X | unaff | del | common nongenetic |
| 3 | 163995377 | 164108060 | B00AB15 | unaff | del | common nongenetic |
| 3 | 163995377 | 164108060 | B00AB1D | unaff | del | common nongenetic |

|   |           |           |         |       |     |                   |
|---|-----------|-----------|---------|-------|-----|-------------------|
| 3 | 163995377 | 164108060 | B00AB1S | unaff | del | common nongenetic |
| 3 | 163995377 | 164108060 | B00AB1V | unaff | del | common nongenetic |
| 3 | 163995377 | 164108060 | B00AB2A | unaff | del | common nongenetic |
| 3 | 163995377 | 164108060 | B00AB4J | unaff | del | common nongenetic |
| 3 | 163995377 | 164108060 | B00AB4M | unaff | del | common nongenetic |
| 3 | 163995377 | 164108060 | B00AB52 | unaff | del | common nongenetic |
| 3 | 163995377 | 164108060 | B00AB57 | unaff | del | common nongenetic |
| 3 | 163995377 | 164108060 | B00AB58 | unaff | del | common nongenetic |
| 3 | 163995377 | 164108060 | B00AB5U | unaff | del | common nongenetic |
| 3 | 163995377 | 164108060 | B00AB62 | unaff | del | common nongenetic |
| 3 | 163995377 | 164108060 | B00AB6E | unaff | del | common nongenetic |
| 3 | 163995377 | 164108060 | B00AB7K | unaff | del | common nongenetic |
| 3 | 163995377 | 164108060 | B00AB7L | unaff | del | common nongenetic |
| 3 | 163995377 | 164108060 | B00AB7V | unaff | del | common nongenetic |
| 3 | 163995377 | 164108060 | B00AB83 | unaff | del | common nongenetic |
| 3 | 163995377 | 164108060 | B00AB8W | unaff | del | common nongenetic |
| 3 | 163995377 | 164108060 | B00ABA9 | unaff | del | common nongenetic |
| 3 | 163995377 | 164108060 | B00ABAT | unaff | del | common nongenetic |
| 3 | 163995377 | 164108060 | B00ABC2 | unaff | del | common nongenetic |
| 3 | 163995377 | 164108060 | B00ABC3 | unaff | del | common nongenetic |
| 3 | 163995377 | 164108060 | B00ABC9 | unaff | del | common nongenetic |
| 3 | 163995377 | 164108060 | B00ABCH | unaff | del | common nongenetic |
| 3 | 163995377 | 164108060 | B00ABEJ | unaff | del | common nongenetic |
| 3 | 163995377 | 164108060 | B00B0CY | aff   | del | common nongenetic |
| 3 | 163995377 | 164108060 | B00B0D6 | aff   | del | common nongenetic |



|   |           |           |         |     |     |                   |
|---|-----------|-----------|---------|-----|-----|-------------------|
| 3 | 163995377 | 164108060 | B00B0F8 | aff | del | common nongenetic |
| 3 | 163995377 | 164108060 | B00B0FQ | aff | del | common nongenetic |
| 3 | 163995377 | 164108060 | B00B0G2 | aff | del | common nongenetic |
| 3 | 163995377 | 164108060 | B00B0H4 | aff | del | common nongenetic |
| 3 | 163995377 | 164108060 | B00B0H9 | aff | del | common nongenetic |
| 3 | 163995377 | 164108060 | B00B0HA | aff | del | common nongenetic |
| 3 | 163995377 | 164108060 | B00B0HK | aff | del | common nongenetic |
| 3 | 163995377 | 164108060 | B00B0I0 | aff | del | common nongenetic |
| 3 | 163995377 | 164108060 | B00B0I4 | aff | del | common nongenetic |
| 3 | 163995377 | 164108060 | B00B0IB | aff | del | common nongenetic |
| 3 | 163995377 | 164108060 | B00B0IK | aff | del | common nongenetic |
| 3 | 163995377 | 164108060 | B00B0JG | aff | del | common nongenetic |
| 3 | 163995377 | 164108060 | B00B0KB | aff | del | common nongenetic |
| 3 | 163995377 | 164108060 | B00B0KS | aff | del | common nongenetic |
| 3 | 163995377 | 164108060 | B00B0L6 | aff | del | common nongenetic |
| 3 | 163995377 | 164108060 | B00B0L9 | aff | del | common nongenetic |
| 3 | 163995377 | 164108060 | B00B0NS | aff | del | common nongenetic |
| 3 | 163995377 | 164108060 | B00B0NU | aff | del | common nongenetic |
| 3 | 163995377 | 164108060 | B00B0PB | aff | del | common nongenetic |
| 3 | 163995377 | 164108060 | B00B0PG | aff | del | common nongenetic |
| 3 | 163995377 | 164108060 | B00B0PJ | aff | del | common nongenetic |
| 3 | 163995377 | 164108060 | B00B0PT | aff | del | common nongenetic |
| 3 | 163995377 | 164108060 | B00B0ST | aff | del | common nongenetic |
| 3 | 163995377 | 164108060 | B00B0TE | aff | del | common nongenetic |
| 3 | 163995377 | 164108060 | B00B0U2 | aff | del | common nongenetic |

|   |           |           |         |     |     |                   |
|---|-----------|-----------|---------|-----|-----|-------------------|
| 3 | 163995377 | 164108060 | B00B0UX | aff | del | common nongenetic |
| 3 | 163995377 | 164108060 | B00B0V4 | aff | del | common nongenetic |
| 3 | 163995377 | 164108060 | B00B0VE | aff | del | common nongenetic |
| 3 | 163995377 | 164108060 | B00B0VW | aff | del | common nongenetic |
| 3 | 163995377 | 164108060 | B00B0WU | aff | del | common nongenetic |
| 3 | 163995377 | 164108060 | B00B0WX | aff | del | common nongenetic |
| 3 | 163995377 | 164108060 | B00B0XD | aff | del | common nongenetic |
| 3 | 163995377 | 164108060 | B00B0XS | aff | del | common nongenetic |
| 3 | 163995377 | 164108060 | B00B0YH | aff | del | common nongenetic |
| 3 | 163995377 | 164108060 | B00B0YX | aff | del | common nongenetic |
| 3 | 163995377 | 164108060 | B00B0Z4 | aff | del | common nongenetic |
| 3 | 163995377 | 164108060 | B00B0Z5 | aff | del | common nongenetic |
| 3 | 163995377 | 164108060 | B00B0Z8 | aff | del | common nongenetic |
| 3 | 163995377 | 164108060 | B00B0ZM | aff | del | common nongenetic |
| 3 | 163995377 | 164108060 | B00B0ZU | aff | del | common nongenetic |
| 3 | 163995377 | 164108060 | B00B105 | aff | del | common nongenetic |
| 3 | 163995377 | 164108060 | B00B10E | aff | del | common nongenetic |
| 3 | 163995377 | 164108060 | B00B10K | aff | del | common nongenetic |
| 3 | 163995377 | 164108060 | B00B10N | aff | del | common nongenetic |
| 3 | 163995377 | 164108060 | B00B10Q | aff | del | common nongenetic |
| 3 | 163995377 | 164108060 | B00B11I | aff | del | common nongenetic |
| 3 | 163995377 | 164108060 | B00B11M | aff | del | common nongenetic |
| 3 | 163995377 | 164108060 | B00B11T | aff | del | common nongenetic |
| 3 | 163995377 | 164108060 | B00B126 | aff | del | common nongenetic |
| 3 | 163995377 | 164108060 | B00B12U | aff | del | common nongenetic |

|   |           |           |         |     |     |                   |
|---|-----------|-----------|---------|-----|-----|-------------------|
| 3 | 163995377 | 164108060 | B00B13Y | aff | del | common nongenetic |
| 3 | 163995377 | 164108060 | B00B13Z | aff | del | common nongenetic |
| 3 | 163995377 | 164108060 | B00B149 | aff | del | common nongenetic |
| 3 | 163995377 | 164108060 | B00B14F | aff | del | common nongenetic |
| 3 | 163995377 | 164108060 | B00B14V | aff | del | common nongenetic |
| 3 | 163995377 | 164108060 | B00B15R | aff | del | common nongenetic |
| 3 | 163995377 | 164108060 | B00B15T | aff | del | common nongenetic |
| 3 | 163995377 | 164108060 | B00B160 | aff | del | common nongenetic |
| 3 | 163995377 | 164108060 | B00B16W | aff | del | common nongenetic |
| 3 | 163995377 | 164108060 | B00B17P | aff | del | common nongenetic |
| 3 | 163995377 | 164108060 | B00B190 | aff | del | common nongenetic |
| 3 | 163995377 | 164108060 | B00B195 | aff | del | common nongenetic |
| 3 | 163995377 | 164108060 | B00B199 | aff | del | common nongenetic |
| 3 | 163995377 | 164108060 | B00B19A | aff | del | common nongenetic |
| 3 | 163995377 | 164108060 | B00B19E | aff | del | common nongenetic |
| 3 | 163995377 | 164108060 | B00B19O | aff | del | common nongenetic |
| 3 | 163995377 | 164108060 | B00B19P | aff | del | common nongenetic |
| 3 | 163995377 | 164108060 | B00B19S | aff | del | common nongenetic |
| 3 | 163995377 | 164108060 | B00B1A2 | aff | del | common nongenetic |
| 3 | 163995377 | 164108060 | B00B1A3 | aff | del | common nongenetic |
| 3 | 163995377 | 164108060 | B00B1B4 | aff | del | common nongenetic |
| 3 | 163995377 | 164108060 | B00B1BD | aff | del | common nongenetic |
| 3 | 163995377 | 164108060 | B00B1BP | aff | del | common nongenetic |
| 3 | 163995377 | 164108060 | B00B1CE | aff | del | common nongenetic |
| 3 | 163995377 | 164108060 | B00B1CJ | aff | del | common nongenetic |

|   |           |           |         |     |     |                   |
|---|-----------|-----------|---------|-----|-----|-------------------|
| 3 | 163995377 | 164108060 | B00B1CR | aff | del | common nongenetic |
| 3 | 163995377 | 164108060 | B00B1CX | aff | del | common nongenetic |
| 3 | 163995377 | 164108060 | B00BDH9 | aff | del | common nongenetic |
| 3 | 163995377 | 164108060 | B00BDHW | aff | del | common nongenetic |
| 3 | 163995377 | 164108060 | B00BDHX | aff | del | common nongenetic |
| 3 | 163995377 | 164108060 | B00BDIN | aff | del | common nongenetic |
| 3 | 163995377 | 164108060 | B00BDJ8 | aff | del | common nongenetic |
| 3 | 163995377 | 164108060 | B00BDJB | aff | del | common nongenetic |
| 3 | 163995377 | 164108060 | B00BDJU | aff | del | common nongenetic |
| 3 | 163995377 | 164108060 | B00BDJY | aff | del | common nongenetic |
| 3 | 163995377 | 164108060 | B00BDKA | aff | del | common nongenetic |
| 3 | 163995377 | 164108060 | B00BDKW | aff | del | common nongenetic |
| 3 | 163995377 | 164108060 | B00BDL2 | aff | del | common nongenetic |
| 3 | 163995377 | 164108060 | B00BDLB | aff | del | common nongenetic |
| 3 | 163995377 | 164108060 | B00BDQB | aff | del | common nongenetic |
| 3 | 163995377 | 164108060 | B00BDR2 | aff | del | common nongenetic |
| 3 | 163995377 | 164108060 | B00BDRA | aff | del | common nongenetic |
| 3 | 163995377 | 164108060 | B00BDRD | aff | del | common nongenetic |
| 3 | 163995377 | 164108060 | B00BDRN | aff | del | common nongenetic |
| 3 | 163995377 | 164108060 | B00BDTI | aff | del | common nongenetic |
| 3 | 163995377 | 164108060 | B00BDUD | aff | del | common nongenetic |
| 3 | 163995377 | 164108060 | B00BDUY | aff | del | common nongenetic |
| 3 | 163995377 | 164108060 | B00BDZA | aff | del | common nongenetic |
| 3 | 163995377 | 164108060 | B00BDZI | aff | del | common nongenetic |
| 3 | 163995377 | 164108060 | B00BDZQ | aff | del | common nongenetic |

|   |           |           |         |     |     |                   |
|---|-----------|-----------|---------|-----|-----|-------------------|
| 3 | 163995377 | 164108060 | B00BDZZ | aff | del | common nongenetic |
| 3 | 163995377 | 164108060 | B00BE0I | aff | del | common nongenetic |
| 3 | 163995377 | 164108060 | B00BE0M | aff | del | common nongenetic |
| 3 | 163995377 | 164108060 | B00BE0T | aff | del | common nongenetic |
| 3 | 163995377 | 164108060 | B00BE0W | aff | del | common nongenetic |
| 3 | 163995377 | 164108060 | B00BE1B | aff | del | common nongenetic |
| 3 | 163995377 | 164108060 | B00BE1X | aff | del | common nongenetic |
| 3 | 163995377 | 164108060 | B00BE29 | aff | del | common nongenetic |
| 3 | 163995377 | 164108060 | B00BE30 | aff | del | common nongenetic |
| 3 | 163995377 | 164108060 | B00BE3L | aff | del | common nongenetic |
| 3 | 163995377 | 164108060 | B00BE3O | aff | del | common nongenetic |
| 3 | 163995377 | 164108060 | B00BE3Q | aff | del | common nongenetic |
| 3 | 163995377 | 164108060 | B00BE3S | aff | del | common nongenetic |
| 3 | 163995377 | 164108060 | B00BE3W | aff | del | common nongenetic |
| 3 | 163995377 | 164108060 | B00BE3X | aff | del | common nongenetic |
| 3 | 163995377 | 164108060 | B00BE64 | aff | del | common nongenetic |
| 3 | 163995377 | 164108060 | B00BE78 | aff | del | common nongenetic |
| 3 | 163995377 | 164108060 | B00BE7T | aff | del | common nongenetic |
| 3 | 163995377 | 164108060 | B00BE90 | aff | del | common nongenetic |
| 3 | 163995377 | 164108060 | B00BE9M | aff | del | common nongenetic |
| 3 | 163995377 | 164108060 | B00BE9V | aff | del | common nongenetic |
| 3 | 163995377 | 164108060 | B00BEAH | aff | del | common nongenetic |
| 3 | 163995377 | 164108060 | B00BEEC | aff | del | common nongenetic |
| 3 | 163995377 | 164108060 | B00BEEE | aff | del | common nongenetic |
| 3 | 163995377 | 164108060 | B00BEEQ | aff | del | common nongenetic |

|   |           |           |         |     |     |                   |
|---|-----------|-----------|---------|-----|-----|-------------------|
| 3 | 163995377 | 164108060 | B00BEER | aff | del | common nongenetic |
| 3 | 163995377 | 164108060 | B00BEFJ | aff | del | common nongenetic |
| 3 | 163995377 | 164108060 | B00BEFL | aff | del | common nongenetic |
| 3 | 163995377 | 164108060 | B00BEFW | aff | del | common nongenetic |
| 3 | 163995377 | 164108060 | B00BEFY | aff | del | common nongenetic |
| 3 | 163995377 | 164108060 | B00BEG2 | aff | del | common nongenetic |
| 3 | 163995377 | 164108060 | B00BEG7 | aff | del | common nongenetic |
| 3 | 163995377 | 164108060 | B00BEGD | aff | del | common nongenetic |
| 3 | 163995377 | 164108060 | B00BEGW | aff | del | common nongenetic |
| 3 | 163995377 | 164108060 | B00BEH5 | aff | del | common nongenetic |
| 3 | 163995377 | 164108060 | B00BEHA | aff | del | common nongenetic |
| 3 | 163995377 | 164108060 | B00BEHC | aff | del | common nongenetic |
| 3 | 163995377 | 164108060 | B00BEHL | aff | del | common nongenetic |
| 3 | 163995377 | 164108060 | B00BEHS | aff | del | common nongenetic |
| 3 | 163995377 | 164108060 | B00BEI9 | aff | del | common nongenetic |
| 3 | 163995377 | 164108060 | B00BEJI | aff | del | common nongenetic |
| 3 | 163995377 | 164108060 | B00BEKT | aff | del | common nongenetic |
| 3 | 163995377 | 164108060 | B00BELO | aff | del | common nongenetic |
| 3 | 163995377 | 164108060 | B00BEL5 | aff | del | common nongenetic |
| 3 | 163995377 | 164108060 | B00BELI | aff | del | common nongenetic |
| 3 | 163995377 | 164108060 | B00BELK | aff | del | common nongenetic |
| 3 | 163995377 | 164108060 | B00BELP | aff | del | common nongenetic |
| 3 | 163995377 | 164108060 | B00BELQ | aff | del | common nongenetic |
| 3 | 163995377 | 164108060 | B00BELZ | aff | del | common nongenetic |
| 3 | 163995377 | 164108060 | B00BEM3 | aff | del | common nongenetic |

|   |           |           |         |     |     |                   |
|---|-----------|-----------|---------|-----|-----|-------------------|
| 3 | 163995377 | 164108060 | B00BEMH | aff | del | common nongenetic |
| 3 | 163995377 | 164108060 | B00BESG | aff | del | common nongenetic |
| 3 | 163995377 | 164108060 | B00BESQ | aff | del | common nongenetic |
| 3 | 163995377 | 164108060 | B00BET6 | aff | del | common nongenetic |
| 3 | 163995377 | 164108060 | B00BETY | aff | del | common nongenetic |
| 3 | 163995377 | 164108060 | B00BEUO | aff | del | common nongenetic |
| 3 | 163995377 | 164108060 | B00BEUU | aff | del | common nongenetic |
| 3 | 163995377 | 164108060 | B00BEV4 | aff | del | common nongenetic |
| 3 | 163995377 | 164108060 | B00BEVJ | aff | del | common nongenetic |
| 3 | 163995377 | 164108060 | B00BEVQ | aff | del | common nongenetic |
| 3 | 163995377 | 164108060 | B00BEVY | aff | del | common nongenetic |
| 3 | 163995377 | 164108060 | B00BEVZ | aff | del | common nongenetic |
| 3 | 163995377 | 164108060 | B00BEWD | aff | del | common nongenetic |
| 3 | 163995377 | 164108060 | B00BQL3 | aff | del | common nongenetic |
| 3 | 163995377 | 164108060 | B00BQL7 | aff | del | common nongenetic |
| 3 | 163995377 | 164108060 | B00BQLP | aff | del | common nongenetic |
| 3 | 163995377 | 164108060 | B00BQLQ | aff | del | common nongenetic |
| 3 | 163995377 | 164108060 | B00BQN8 | aff | del | common nongenetic |
| 3 | 163995377 | 164108060 | B00BQNA | aff | del | common nongenetic |
| 3 | 163995377 | 164108060 | B00BQNC | aff | del | common nongenetic |
| 3 | 163995377 | 164108060 | B00BQOC | aff | del | common nongenetic |
| 3 | 163995377 | 164108060 | B00BQOG | aff | del | common nongenetic |
| 3 | 163995377 | 164108060 | B00BQPI | aff | del | common nongenetic |
| 3 | 163995377 | 164108060 | B00BQPU | aff | del | common nongenetic |
| 3 | 163995377 | 164108060 | B00BQQI | aff | del | common nongenetic |

|   |           |           |         |       |     |                   |
|---|-----------|-----------|---------|-------|-----|-------------------|
| 3 | 163995377 | 164108060 | B00BQQT | aff   | del | common nongenetic |
| 3 | 163995377 | 164108060 | B00BQRG | aff   | del | common nongenetic |
| 3 | 163995377 | 164108060 | B00BQRW | aff   | del | common nongenetic |
| 3 | 163995377 | 164123191 | B00BE14 | aff   | dup | rare nongenetic   |
| 3 | 163995377 | 165068663 | B00B0KM | aff   | del | rare genic        |
| 3 | 163996449 | 164108060 | B009FTS | aff   | del | common nongenetic |
| 3 | 176473458 | 176724909 | B00AAZF | unaff | del | rare genic        |
| 3 | 177366869 | 177769362 | B00BEDQ | aff   | dup | rare nongenetic   |
| 3 | 188312190 | 188584129 | B00BE0K | aff   | dup | rare genic        |
| 3 | 191114253 | 191967158 | B00B153 | aff   | dup | rare genic        |
| 3 | 194378993 | 194771079 | B00BE0K | aff   | dup | rare genic        |
| 3 | 196829898 | 196961660 | B00ABAR | unaff | del | rare genic        |
| 3 | 197172067 | 198799512 | B00B0TA | aff   | del | rare genic        |
| 3 | 197222803 | 197509116 | B00B140 | aff   | dup | rare genic        |
| 4 | 63508     | 616786    | B00BEH5 | aff   | del | rare genic        |
| 4 | 615962    | 743944    | B00BDNX | aff   | dup | rare genic        |
| 4 | 676563    | 785890    | B00B15U | aff   | dup | rare genic        |
| 4 | 750258    | 1381235   | B00BDIL | aff   | del | rare genic        |
| 4 | 753077    | 1014752   | B00BE94 | aff   | del | rare genic        |
| 4 | 783929    | 1014752   | B00BE8D | aff   | del | rare genic        |
| 4 | 785890    | 1009011   | B00BE5T | aff   | del | rare genic        |
| 4 | 811490    | 984414    | B00BE8Z | aff   | del | rare genic        |
| 4 | 818148    | 1009011   | B00BE9Q | aff   | del | rare genic        |
| 4 | 870094    | 1009011   | B00BE6J | aff   | del | rare genic        |
| 4 | 954359    | 1071307   | B00BE8P | aff   | del | rare genic        |



|   |          |          |         |       |     |               |
|---|----------|----------|---------|-------|-----|---------------|
| 4 | 1148991  | 1342685  | B00BE8M | aff   | del | rare genic    |
| 4 | 1227014  | 1342685  | B00B17C | aff   | del | rare genic    |
| 4 | 1280797  | 1381235  | B00BDK8 | aff   | del | rare genic    |
| 4 | 3384452  | 3494855  | B00B17B | aff   | del | rare genic    |
| 4 | 4845715  | 5206568  | B00BDZG | aff   | del | rare genic    |
| 4 | 8271300  | 8414770  | B00AA81 | unaff | del | rare genic    |
| 4 | 10311254 | 11496581 | B009G31 | aff   | dup | rare genic    |
| 4 | 11510030 | 11833486 | B00AAJL | unaff | del | rare nongenic |
| 4 | 13280866 | 13896864 | B00AABG | unaff | del | rare genic    |
| 4 | 20994665 | 21911450 | B009G8U | aff   | del | rare genic    |
| 4 | 30719435 | 32126633 | B00BE1C | aff   | del | rare genic    |
| 4 | 35048493 | 35202344 | B00BQQ1 | aff   | del | rare nongenic |
| 4 | 55674315 | 56550424 | B00BET3 | aff   | del | rare genic    |
| 4 | 57834727 | 58261378 | B00B0IB | aff   | dup | rare nongenic |
| 4 | 57836124 | 58261378 | B00BEGH | aff   | dup | rare nongenic |
| 4 | 59271421 | 59593377 | B00BEKY | aff   | del | rare nongenic |
| 4 | 63374623 | 63807776 | B00BELE | aff   | dup | rare nongenic |
| 4 | 70655297 | 71115627 | B00B13I | aff   | del | rare genic    |
| 4 | 85107557 | 85332483 | B00BETY | aff   | del | rare nongenic |
| 4 | 89393217 | 89447952 | B00B1D3 | aff   | dup | candidate     |
| 4 | 91068469 | 94121905 | B00BE25 | aff   | dup | rare genic    |
| 4 | 92598104 | 93214903 | B00BELA | aff   | dup | rare genic    |
| 4 | 92925574 | 93355820 | B00AAY1 | unaff | del | rare nongenic |
| 4 | 95371436 | 95629282 | B00AB5N | unaff | dup | rare genic    |
| 4 | 95496334 | 95914000 | B00BQQY | aff   | dup | common genic  |

|   |           |           |         |       |     |                 |
|---|-----------|-----------|---------|-------|-----|-----------------|
| 4 | 99365459  | 99827386  | B00B1CE | aff   | dup | rare genic      |
| 4 | 116183829 | 116684288 | B00BDMV | aff   | del | rare genic      |
| 4 | 120133025 | 121677135 | B009EFI | unaff | dup | rare genic      |
| 4 | 126276161 | 126938646 | B00B0UI | aff   | dup | rare genic      |
| 4 | 127744542 | 127907884 | B00B0IT | aff   | del | rare nongenic   |
| 4 | 127761082 | 127968840 | B009FWD | aff   | del | rare nongenic   |
| 4 | 130737836 | 130934218 | B00AAJR | unaff | del | rare nongenic   |
| 4 | 132179051 | 132612177 | B009GAK | aff   | dup | rare nongenic   |
| 4 | 135141815 | 135395786 | B00B14H | aff   | del | common genic    |
| 4 | 135141815 | 135395786 | B00B174 | aff   | del | common genic    |
| 4 | 135141815 | 135415132 | B00AA8Q | unaff | del | common genic    |
| 4 | 135151781 | 135395786 | B00BEN5 | aff   | del | common genic    |
| 4 | 135151781 | 135415132 | B009RKW | unaff | del | common genic    |
| 4 | 135151781 | 135415132 | B00BEH5 | aff   | del | common genic    |
| 4 | 151542940 | 152070096 | B00BDJY | aff   | dup | rare genic      |
| 4 | 164019208 | 166219645 | B00B105 | aff   | dup | rare genic      |
| 4 | 169051922 | 169224618 | B00B0HH | aff   | del | common nongenic |
| 4 | 169051922 | 169224618 | B00B1A2 | aff   | del | common nongenic |
| 4 | 169051922 | 169229016 | B00AAG4 | unaff | del | common nongenic |
| 4 | 169051922 | 169229016 | B00B0RP | aff   | del | common nongenic |
| 4 | 169056796 | 169224618 | B00B0VZ | aff   | del | common nongenic |
| 4 | 169056796 | 169229016 | B009EFM | unaff | del | common nongenic |
| 4 | 169056796 | 169229016 | B00AABS | unaff | del | common nongenic |
| 4 | 169056796 | 169229016 | B00AB5K | unaff | del | common nongenic |
| 4 | 169056796 | 169229016 | B00B0WO | aff   | del | common nongenic |

|   |           |           |         |       |     |                 |
|---|-----------|-----------|---------|-------|-----|-----------------|
| 4 | 169056796 | 169229016 | B00BEU5 | aff   | del | common nongenic |
| 4 | 169056796 | 169229016 | B00BQND | aff   | del | common nongenic |
| 4 | 173538773 | 180090097 | B009FQ7 | aff   | del | rare genic      |
| 4 | 173898286 | 174379449 | B00AAX7 | unaff | dup | rare genic      |
| 4 | 174801596 | 175306436 | B009G0I | aff   | del | rare nongenic   |
| 4 | 177268919 | 177828863 | B00AAX7 | unaff | dup | rare genic      |
| 4 | 181640543 | 181995789 | B009EFH | unaff | del | rare nongenic   |
| 4 | 183154798 | 183509306 | B00BE9S | aff   | dup | rare genic      |
| 4 | 188131629 | 188641768 | B00B0KE | aff   | dup | common genic    |
| 4 | 188279758 | 188676957 | B00B0W2 | aff   | del | rare genic      |
| 4 | 188422483 | 190293064 | B00AAWZ | unaff | dup | common genic    |
| 4 | 188698152 | 189171613 | B00BE96 | aff   | del | rare genic      |
| 4 | 188706532 | 189298100 | B00B0R7 | aff   | dup | common genic    |
| 4 | 188723132 | 189208483 | B00B153 | aff   | dup | common genic    |
| 4 | 189299208 | 189993990 | B00B0IM | aff   | del | rare genic      |
| 4 | 189450919 | 189798178 | B00BE8M | aff   | dup | common genic    |
| 4 | 189608238 | 190024149 | B009G47 | aff   | del | rare genic      |
| 4 | 189910088 | 190322725 | B00BE8M | aff   | dup | common nongenic |
| 4 | 190183902 | 190650056 | B00AB9J | unaff | dup | rare genic      |
| 4 | 190195104 | 190783958 | B00BQR5 | aff   | dup | common genic    |
| 5 | 457713    | 608138    | B00BE9J | aff   | del | rare genic      |
| 5 | 1542706   | 1647096   | B00BE00 | aff   | del | rare genic      |
| 5 | 9240035   | 9889777   | B00B0KK | aff   | dup | rare genic      |
| 5 | 10936382  | 11358217  | B00BEFZ | aff   | dup | rare genic      |
| 5 | 11189164  | 11292180  | B00B0WJ | aff   | del | rare genic      |

|   |          |          |         |       |     |                 |
|---|----------|----------|---------|-------|-----|-----------------|
| 5 | 12652348 | 12818292 | B00BEG8 | aff   | del | rare genic      |
| 5 | 16707960 | 17047804 | B00BDTL | aff   | dup | rare genic      |
| 5 | 17780897 | 20721054 | B00BDU5 | aff   | del | rare genic      |
| 5 | 18873891 | 18985138 | B00B0JO | aff   | del | rare nongenic   |
| 5 | 19055301 | 19307090 | B009FN1 | aff   | del | rare nongenic   |
| 5 | 19055301 | 19307090 | B009G41 | aff   | del | rare nongenic   |
| 5 | 21130619 | 21468201 | B009FQ4 | aff   | del | rare nongenic   |
| 5 | 22229724 | 23324930 | B009G8F | aff   | dup | rare genic      |
| 5 | 23246363 | 23920197 | B00BQRD | aff   | del | common genic    |
| 5 | 23324930 | 24242495 | B00AAY9 | unaff | del | rare genic      |
| 5 | 25943666 | 26168705 | B00ABDE | unaff | del | rare nongenic   |
| 5 | 28405338 | 28694972 | B00AAXI | unaff | del | rare nongenic   |
| 5 | 29672799 | 30013867 | B00AAE3 | unaff | dup | common nongenic |
| 5 | 29797618 | 29967547 | B00BEA7 | aff   | dup | common nongenic |
| 5 | 45282852 | 45704795 | B00AB53 | unaff | dup | rare genic      |
| 5 | 53510606 | 53771056 | B00BEFO | aff   | dup | rare genic      |
| 5 | 59502960 | 60033993 | B00B0XJ | aff   | del | rare genic      |
| 5 | 61134031 | 61360715 | B00B0HF | aff   | dup | rare nongenic   |
| 5 | 63345648 | 63900802 | B00BDIV | aff   | del | rare genic      |
| 5 | 65809468 | 66314669 | B009FUA | aff   | dup | rare genic      |
| 5 | 68865824 | 70608833 | B00BE8R | aff   | dup | rare genic      |
| 5 | 68897286 | 70302056 | B00B0SE | aff   | dup | rare genic      |
| 5 | 69411665 | 70122721 | B009G6P | aff   | dup | rare genic      |
| 5 | 69411665 | 70302056 | B009G76 | aff   | dup | rare genic      |
| 5 | 69411665 | 70302056 | B00BDUQ | aff   | dup | rare genic      |

|   |           |           |         |       |     |               |
|---|-----------|-----------|---------|-------|-----|---------------|
| 5 | 69411665  | 70461753  | B00BDV7 | aff   | dup | rare genic    |
| 5 | 69411665  | 70568903  | B00BDU2 | aff   | dup | rare genic    |
| 5 | 70292684  | 70444357  | B00B0H9 | aff   | del | rare genic    |
| 5 | 75132315  | 75446387  | B009G7T | aff   | del | rare genic    |
| 5 | 79970592  | 80299621  | B00BEL3 | aff   | del | rare genic    |
| 5 | 80151846  | 80519330  | B00AAHK | unaff | dup | rare genic    |
| 5 | 80936354  | 85873616  | B009FNG | aff   | dup | rare genic    |
| 5 | 83236774  | 83369744  | B00B0VH | aff   | del | rare genic    |
| 5 | 83835179  | 83943410  | B00B0P6 | aff   | del | candidate     |
| 5 | 83835179  | 83943410  | B00BQQ2 | aff   | del | candidate     |
| 5 | 84838441  | 85510893  | B00AA7V | unaff | dup | rare nongenic |
| 5 | 84977466  | 85306538  | B00AAGC | unaff | del | rare nongenic |
| 5 | 93608265  | 93815065  | B00AA5T | unaff | del | rare genic    |
| 5 | 97359198  | 97619171  | B00ABDA | unaff | dup | rare nongenic |
| 5 | 97428723  | 97533036  | B00AB0M | unaff | del | rare nongenic |
| 5 | 99486205  | 99693322  | B00B128 | aff   | del | rare nongenic |
| 5 | 100865225 | 101153552 | B009FZC | aff   | del | rare nongenic |
| 5 | 101031711 | 101296078 | B00B0XG | aff   | del | rare nongenic |
| 5 | 101503405 | 102033686 | B00AB5B | unaff | del | rare genic    |
| 5 | 103409821 | 103794893 | B00AAHW | unaff | del | rare nongenic |
| 5 | 103769334 | 104206497 | B00BE8Y | aff   | del | rare nongenic |
| 5 | 103848239 | 104873156 | B00BE82 | aff   | dup | rare genic    |
| 5 | 104055999 | 104593641 | B00B0PT | aff   | del | rare genic    |
| 5 | 104226959 | 104383282 | B00B0L6 | aff   | del | rare nongenic |
| 5 | 105045010 | 109092198 | B009EBZ | unaff | dup | rare genic    |

|   |           |           |          |       |     |               |
|---|-----------|-----------|----------|-------|-----|---------------|
| 5 | 106075829 | 106251435 | B00AAWW  | unaff | del | rare nongenic |
| 5 | 110881025 | 111115706 | B009FNP  | aff   | del | rare genic    |
| 5 | 117768444 | 118011511 | B00B0WA  | aff   | del | rare nongenic |
| 5 | 120137142 | 120401936 | B00B179  | aff   | del | rare nongenic |
| 5 | 121880146 | 122332337 | B00B0R7  | aff   | dup | rare genic    |
| 5 | 124083817 | 124904934 | B00ABBB  | unaff | dup | rare genic    |
| 5 | 128381952 | 128911044 | B00B1B4  | aff   | del | rare genic    |
| 5 | 140457078 | 140565698 | B00BE2Q  | aff   | del | rare genic    |
| 5 | 140457078 | 140608740 | B00BDJ7  | aff   | del | rare genic    |
| 5 | 142146025 | 142380312 | B00B0JI  | aff   | dup | rare genic    |
| 5 | 162455558 | 162773916 | B00AAAY7 | unaff | del | rare nongenic |
| 5 | 163587978 | 164014586 | B00BEKB  | aff   | dup | rare nongenic |
| 5 | 178043890 | 178580975 | B00AA7L  | unaff | dup | common genic  |
| 5 | 178357150 | 178646318 | B009G1X  | aff   | dup | common genic  |
| 5 | 179433328 | 179681237 | B00B0SX  | aff   | dup | rare genic    |
| 5 | 179716376 | 179949250 | B00B1D4  | aff   | del | rare genic    |
| 6 | 110391    | 2721302   | B00B11N  | aff   | del | rare genic    |
| 6 | 929646    | 1229697   | B00BQMF  | aff   | dup | rare genic    |
| 6 | 4251352   | 4414640   | B00BQOV  | aff   | del | rare nongenic |
| 6 | 5389000   | 5772499   | B00AB9M  | unaff | dup | rare genic    |
| 6 | 5558936   | 6084568   | B00BEMK  | aff   | dup | common genic  |
| 6 | 8739121   | 8896082   | B00BQNT  | aff   | del | rare nongenic |
| 6 | 21097265  | 21225585  | B00BE21  | aff   | del | rare genic    |
| 6 | 33131041  | 33235965  | B00AB7U  | unaff | del | rare genic    |
| 6 | 57437845  | 57785351  | B00AB6N  | unaff | dup | common genic  |

|   |           |           |         |       |     |                 |
|---|-----------|-----------|---------|-------|-----|-----------------|
| 6 | 57643552  | 58183439  | B00AB1F | unaff | dup | common nongenic |
| 6 | 57643552  | 58183439  | B00B0L3 | aff   | dup | common nongenic |
| 6 | 57766265  | 58183439  | B00B0W2 | aff   | dup | common nongenic |
| 6 | 61949597  | 62945058  | B00B0L3 | aff   | dup | common genic    |
| 6 | 62009819  | 62173501  | B00B0W2 | aff   | dup | rare nongenic   |
| 6 | 62317164  | 62887303  | B00AA83 | unaff | dup | common genic    |
| 6 | 62317164  | 62957473  | B00AB1F | unaff | dup | common genic    |
| 6 | 65684876  | 65873533  | B00AB63 | unaff | del | rare genic      |
| 6 | 65996954  | 66465479  | B00BEF6 | aff   | dup | rare genic      |
| 6 | 67196601  | 67392564  | B00B0SU | aff   | dup | rare nongenic   |
| 6 | 84422168  | 85100638  | B00B133 | aff   | dup | rare genic      |
| 6 | 87355020  | 87985690  | B00BEGA | aff   | dup | rare genic      |
| 6 | 94610606  | 95244735  | B00BEEM | aff   | dup | rare nongenic   |
| 6 | 95048048  | 95543872  | B009G83 | aff   | del | rare nongenic   |
| 6 | 95507138  | 95616345  | B00BETQ | aff   | del | rare nongenic   |
| 6 | 104286807 | 104899587 | B00BE9E | aff   | del | rare nongenic   |
| 6 | 118779768 | 119177507 | B00AB6N | unaff | dup | rare genic      |
| 6 | 122084816 | 122622855 | B00AB5Q | unaff | dup | rare nongenic   |
| 6 | 123590696 | 124371375 | B00AB8E | unaff | dup | rare genic      |
| 6 | 130815508 | 130929945 | B00AAIZ | unaff | dup | rare nongenic   |
| 6 | 160602208 | 160975914 | B00BQO0 | aff   | dup | rare genic      |
| 6 | 161521152 | 161647782 | B00AAG9 | unaff | dup | rare genic      |
| 6 | 162154323 | 162670082 | B00AAG6 | unaff | del | common genic    |
| 6 | 162316649 | 162485708 | B009FWV | aff   | del | common genic    |
| 6 | 162316649 | 162547280 | B00B1AE | aff   | del | common genic    |

|   |           |           |         |       |     |              |
|---|-----------|-----------|---------|-------|-----|--------------|
| 6 | 162385193 | 163001802 | B00B1B4 | aff   | dup | common genic |
| 6 | 162386612 | 162644237 | B00BE1Q | aff   | del | common genic |
| 6 | 162543210 | 162935269 | B00BEMG | aff   | dup | common genic |
| 6 | 162552161 | 162840363 | B00B0RP | aff   | dup | common genic |
| 6 | 162566759 | 162769931 | B00AB8V | unaff | del | rare genic   |
| 6 | 162566759 | 162806676 | B00AA73 | unaff | dup | common genic |
| 6 | 162580056 | 162805539 | B00BEV9 | aff   | dup | common genic |
| 6 | 162580056 | 162840363 | B00AB4C | unaff | dup | common genic |
| 6 | 162580056 | 162979704 | B00BQNC | aff   | dup | common genic |
| 6 | 162622524 | 162824155 | B00BECN | aff   | dup | common genic |
| 6 | 162637688 | 162834976 | B009EDV | unaff | dup | common genic |
| 6 | 162644237 | 162834267 | B00BQS5 | aff   | dup | common genic |
| 6 | 162644237 | 162834976 | B00BDJ0 | aff   | dup | common genic |
| 6 | 162687672 | 162809965 | B00B12U | aff   | del | common genic |
| 6 | 162791913 | 162965453 | B00ABEB | unaff | del | rare genic   |
| 6 | 168071512 | 168324211 | B00B124 | aff   | dup | common genic |
| 6 | 168071512 | 168342182 | B00AA77 | unaff | dup | common genic |
| 6 | 168078929 | 168274300 | B00BEAX | aff   | dup | common genic |
| 6 | 168078929 | 168293188 | B00BE92 | aff   | dup | common genic |
| 6 | 168078929 | 168323590 | B00B0Z1 | aff   | dup | common genic |
| 6 | 168078929 | 168323590 | B00BE1F | aff   | dup | common genic |
| 6 | 168078929 | 168323590 | B00BE1M | aff   | dup | common genic |
| 6 | 168078929 | 168324211 | B00B0UL | aff   | dup | common genic |
| 6 | 168078929 | 168326598 | B00AB2E | unaff | dup | common genic |
| 6 | 168078929 | 168334983 | B00BEGB | aff   | dup | common genic |



|   |           |           |         |       |     |              |
|---|-----------|-----------|---------|-------|-----|--------------|
| 6 | 168078929 | 168336805 | B00BEDQ | aff   | dup | common genic |
| 6 | 168078929 | 168339100 | B009RJZ | unaff | dup | common genic |
| 6 | 168078929 | 168339100 | B00B0J1 | aff   | dup | common genic |
| 6 | 168078929 | 168341048 | B00B1AU | aff   | dup | common genic |
| 6 | 168078929 | 168342182 | B00AAYC | unaff | dup | common genic |
| 6 | 168078929 | 168342182 | B00ABA6 | unaff | dup | common genic |
| 6 | 168078929 | 168342182 | B00BORF | aff   | dup | common genic |
| 6 | 168078929 | 168342182 | B00BORL | aff   | dup | common genic |
| 6 | 168078929 | 168342182 | B00BORS | aff   | dup | common genic |
| 6 | 168083754 | 168323590 | B00B0LS | aff   | dup | common genic |
| 6 | 168083754 | 168334983 | B00ABAW | unaff | dup | common genic |
| 6 | 168083754 | 168334983 | B00BE2D | aff   | dup | common genic |
| 6 | 168083754 | 168342182 | B00B152 | aff   | dup | common genic |
| 6 | 168083754 | 168342182 | B00BQO3 | aff   | dup | common genic |
| 6 | 168083754 | 168342182 | B00BQPV | aff   | dup | common genic |
| 6 | 168085280 | 168217798 | B00BDRK | aff   | dup | common genic |
| 6 | 168085280 | 168301695 | B00BETT | aff   | dup | common genic |
| 6 | 168085280 | 168319676 | B00BDZP | aff   | dup | common genic |
| 6 | 168085280 | 168323590 | B009EG4 | unaff | dup | common genic |
| 6 | 168085280 | 168342182 | B00BEW1 | aff   | dup | common genic |
| 6 | 168085280 | 168355480 | B00AAVD | unaff | dup | common genic |
| 6 | 168086687 | 168274300 | B009FZI | aff   | dup | common genic |
| 6 | 168086687 | 168274300 | B00B13C | aff   | dup | common genic |
| 6 | 168086687 | 168274300 | B00BEVJ | aff   | dup | common genic |
| 6 | 168086687 | 168319676 | B009FZU | aff   | dup | common genic |

|   |           |           |         |       |     |              |
|---|-----------|-----------|---------|-------|-----|--------------|
| 6 | 168086687 | 168323590 | B00BDYX | aff   | dup | common genic |
| 6 | 168086687 | 168323590 | B00BEMY | aff   | dup | common genic |
| 6 | 168086687 | 168324211 | B009G94 | aff   | dup | common genic |
| 6 | 168086687 | 168334983 | B009RL1 | unaff | dup | common genic |
| 6 | 168086687 | 168334983 | B00BEFY | aff   | dup | common genic |
| 6 | 168086687 | 168341048 | B009G3A | aff   | dup | common genic |
| 6 | 168086687 | 168342182 | B00AAHY | unaff | dup | common genic |
| 6 | 168086687 | 168342182 | B00B0W5 | aff   | dup | common genic |
| 6 | 168086687 | 168342182 | B00BDH2 | aff   | dup | common genic |
| 6 | 168086687 | 168342182 | B00BDTJ | aff   | dup | common genic |
| 6 | 168086687 | 168342182 | B00BEKK | aff   | dup | common genic |
| 6 | 168086687 | 168352184 | B00B16U | aff   | dup | common genic |
| 6 | 168091860 | 168293033 | B00BDSP | aff   | dup | common genic |
| 6 | 168091860 | 168319676 | B009EBL | unaff | dup | common genic |
| 6 | 168091860 | 168326598 | B009GBL | aff   | dup | common genic |
| 6 | 168091860 | 168334983 | B00B13M | aff   | dup | common genic |
| 6 | 168091860 | 168336805 | B009GAN | aff   | dup | common genic |
| 6 | 168091860 | 168339100 | B00AA6A | unaff | dup | common genic |
| 6 | 168091860 | 168341048 | B00B12R | aff   | dup | common genic |
| 6 | 168091860 | 168342182 | B009G7N | aff   | dup | common genic |
| 6 | 168091860 | 168342182 | B00B0Y2 | aff   | dup | common genic |
| 6 | 168091860 | 168355480 | B009G8T | aff   | dup | common genic |
| 6 | 168134708 | 168326598 | B00B0NT | aff   | dup | common genic |
| 6 | 168138806 | 168319676 | B00BDIM | aff   | dup | common genic |
| 6 | 168153325 | 168299155 | B00AA8T | unaff | dup | common genic |

|   |           |           |         |       |     |                 |
|---|-----------|-----------|---------|-------|-----|-----------------|
| 6 | 168156044 | 168342182 | B00B14Y | aff   | dup | common genic    |
| 6 | 168167925 | 168292816 | B00B131 | aff   | dup | common genic    |
| 6 | 168167925 | 168319676 | B009EBU | unaff | dup | common genic    |
| 6 | 168175085 | 168342182 | B00BQLE | aff   | dup | common genic    |
| 6 | 168205614 | 168339100 | B00BE0K | aff   | dup | common genic    |
| 6 | 168217798 | 168319676 | B00BDKE | aff   | dup | common genic    |
| 6 | 168233081 | 168342182 | B00AACC | unaff | dup | common nongenic |
| 6 | 168397753 | 170511818 | B00B19X | aff   | del | rare genic      |
| 6 | 168654150 | 168802701 | B00BE0I | aff   | dup | rare genic      |
| 6 | 169572425 | 169974432 | B00ABDL | unaff | dup | rare genic      |
| 6 | 169968325 | 170273260 | B00BE0I | aff   | dup | common nongenic |
| 7 | 3348315   | 3552086   | B009EFB | unaff | dup | rare genic      |
| 7 | 3445958   | 3733345   | B00BES9 | aff   | del | rare genic      |
| 7 | 4334226   | 4497466   | B009G13 | aff   | del | rare nongenic   |
| 7 | 4334226   | 4497466   | B00BQNF | aff   | dup | rare nongenic   |
| 7 | 4342226   | 4497466   | B00B1CI | aff   | del | rare nongenic   |
| 7 | 5285913   | 6363244   | B00B0K5 | aff   | del | rare genic      |
| 7 | 6896187   | 7317208   | B00AB1Y | unaff | dup | rare genic      |
| 7 | 8923566   | 9160323   | B009G6B | aff   | del | rare nongenic   |
| 7 | 8939335   | 9002835   | B009FUP | aff   | del | candidate       |
| 7 | 9250145   | 9715475   | B00BEEZ | aff   | dup | rare genic      |
| 7 | 9481054   | 9586749   | B00BDIL | aff   | del | rare nongenic   |
| 7 | 11311673  | 11825071  | B00BE6K | aff   | dup | rare genic      |
| 7 | 11982738  | 12156889  | B00AB6C | unaff | del | rare nongenic   |
| 7 | 11982738  | 12156889  | B00BEV0 | aff   | del | common nongenic |

|   |          |          |         |       |     |                 |
|---|----------|----------|---------|-------|-----|-----------------|
| 7 | 14283746 | 15141952 | B00B1CH | aff   | dup | rare genic      |
| 7 | 15091888 | 15231562 | B00B109 | aff   | del | rare genic      |
| 7 | 16882053 | 17220447 | B00AB5Z | unaff | dup | rare genic      |
| 7 | 16882053 | 17372243 | B00BDJU | aff   | dup | common genic    |
| 7 | 16884996 | 17316151 | B009RKW | unaff | dup | rare genic      |
| 7 | 16924924 | 17186413 | B00AA5I | unaff | dup | rare nongenic   |
| 7 | 18120455 | 18270590 | B00BEET | aff   | del | rare genic      |
| 7 | 29175877 | 29501850 | B009EF2 | unaff | dup | rare genic      |
| 7 | 32175752 | 32389924 | B00BEWD | aff   | dup | rare genic      |
| 7 | 40160060 | 40727023 | B00BEU9 | aff   | del | rare genic      |
| 7 | 48273843 | 48388402 | B00BE22 | aff   | del | rare genic      |
| 7 | 52318373 | 53339838 | B00BEFW | aff   | dup | rare genic      |
| 7 | 56800546 | 57659300 | B00BDK7 | aff   | dup | rare genic      |
| 7 | 57294710 | 57525307 | B00B0JM | aff   | dup | rare genic      |
| 7 | 61106115 | 61612697 | B00BQNM | aff   | dup | rare nongenic   |
| 7 | 61649656 | 62075724 | B00B18S | aff   | dup | common nongenic |
| 7 | 61649656 | 62475967 | B00AACM | unaff | dup | common genic    |
| 7 | 61681059 | 62336389 | B00AA90 | unaff | dup | common nongenic |
| 7 | 61681059 | 62372905 | B00AB5E | unaff | dup | common nongenic |
| 7 | 62050982 | 62475967 | B00BESD | aff   | dup | common genic    |
| 7 | 64362745 | 64623517 | B009G3J | aff   | del | common genic    |
| 7 | 64367407 | 64564258 | B00BDTL | aff   | del | common genic    |
| 7 | 64367407 | 64564258 | B00BQN0 | aff   | del | common genic    |
| 7 | 64367407 | 64621013 | B009EG1 | unaff | del | common genic    |
| 7 | 64367407 | 64621013 | B00B0UG | aff   | del | common genic    |

|   |          |          |         |       |     |               |
|---|----------|----------|---------|-------|-----|---------------|
| 7 | 64367407 | 64621013 | B00B0VR | aff   | del | common genic  |
| 7 | 64367407 | 64621013 | B00B0WK | aff   | del | common genic  |
| 7 | 64367407 | 64621013 | B00BEDU | aff   | del | common genic  |
| 7 | 64367407 | 64621013 | B00BEIF | aff   | del | common genic  |
| 7 | 64367407 | 64621013 | B00BQP8 | aff   | del | common genic  |
| 7 | 64367407 | 64621013 | B00BQRA | aff   | del | common genic  |
| 7 | 64367407 | 64623517 | B00BE0S | aff   | del | common genic  |
| 7 | 64369181 | 64564258 | B009GBK | aff   | del | common genic  |
| 7 | 64381033 | 64564258 | B00AAFQ | unaff | del | common genic  |
| 7 | 64381033 | 64564258 | B00AB9Y | unaff | del | common genic  |
| 7 | 64381033 | 64593616 | B00AA6G | unaff | del | common genic  |
| 7 | 64381033 | 64621013 | B009EGY | unaff | del | common genic  |
| 7 | 64381033 | 64621013 | B00AA84 | unaff | del | common genic  |
| 7 | 64381033 | 64621013 | B00BEHP | aff   | del | common genic  |
| 7 | 64381033 | 64621013 | B00BQOK | aff   | del | common genic  |
| 7 | 64381033 | 64623517 | B00B0LB | aff   | del | common genic  |
| 7 | 64382608 | 64621013 | B00B0O5 | aff   | del | common genic  |
| 7 | 66640232 | 66974982 | B00BEFY | aff   | dup | rare nongenic |
| 7 | 71204277 | 71476143 | B00AAGK | unaff | dup | rare genic    |
| 7 | 81302171 | 81455232 | B00AABQ | unaff | dup | rare genic    |
| 7 | 81903851 | 82452185 | B00BEE7 | aff   | dup | rare genic    |
| 7 | 87986401 | 89561733 | B00BDR3 | aff   | dup | common genic  |
| 7 | 88024334 | 89347872 | B00B121 | aff   | dup | common genic  |
| 7 | 88186382 | 89696837 | B00AB0V | unaff | dup | common genic  |
| 7 | 88247949 | 89070411 | B00B114 | aff   | dup | common genic  |

|   |           |           |         |       |     |               |
|---|-----------|-----------|---------|-------|-----|---------------|
| 7 | 88305903  | 88975358  | B009FN7 | aff   | dup | common genic  |
| 7 | 88485794  | 88924574  | B00B18T | aff   | del | rare genic    |
| 7 | 88485794  | 89347872  | B00BDJP | aff   | dup | common genic  |
| 7 | 96110057  | 96378591  | B009FZ9 | aff   | dup | rare genic    |
| 7 | 100747270 | 101073344 | B009EFP | unaff | dup | common genic  |
| 7 | 100755083 | 100914175 | B00B0LY | aff   | dup | common genic  |
| 7 | 100755083 | 100914175 | B00BETB | aff   | dup | common genic  |
| 7 | 108559459 | 108818971 | B00BQMC | aff   | del | rare nongenic |
| 7 | 110711525 | 111077203 | B00BQLL | aff   | del | common genic  |
| 7 | 110711525 | 111116572 | B00AAWX | unaff | del | common genic  |
| 7 | 110744530 | 110956463 | B00AB6T | unaff | del | common genic  |
| 7 | 110747117 | 111034187 | B00BDHX | aff   | del | common genic  |
| 7 | 110761280 | 111116572 | B00BDV8 | aff   | del | common genic  |
| 7 | 110780405 | 110987007 | B00AAJ9 | unaff | del | common genic  |
| 7 | 110810558 | 110956463 | B009GAN | aff   | del | common genic  |
| 7 | 110837011 | 110987007 | B00B13S | aff   | del | common genic  |
| 7 | 117247490 | 118948670 | B00BDUM | aff   | dup | rare genic    |
| 7 | 119820650 | 120011536 | B00AAJF | unaff | del | rare genic    |
| 7 | 133180188 | 133686853 | B00ABCF | unaff | dup | rare genic    |
| 7 | 133815486 | 135724896 | B00B14F | aff   | del | rare genic    |
| 7 | 135469891 | 135735968 | B00B11X | aff   | dup | rare nongenic |
| 7 | 143518119 | 143679865 | B00B0YL | aff   | dup | common genic  |
| 7 | 143518119 | 143701573 | B00B0EG | aff   | dup | common genic  |
| 7 | 143518119 | 143701573 | B00BDJ2 | aff   | dup | common genic  |
| 7 | 143521850 | 143682177 | B009EF0 | unaff | dup | common genic  |

|   |           |           |          |       |     |                 |
|---|-----------|-----------|----------|-------|-----|-----------------|
| 7 | 143525695 | 143677143 | B00BDL6  | aff   | dup | common genic    |
| 7 | 143528122 | 143701573 | B009EFA  | unaff | dup | common genic    |
| 7 | 143539215 | 143705232 | B00BE1D  | aff   | dup | common genic    |
| 7 | 143547020 | 143705232 | B00BE9U  | aff   | dup | common genic    |
| 7 | 143581810 | 143705232 | B00BDJA  | aff   | dup | common genic    |
| 7 | 143855577 | 144128605 | B00ABCJ  | unaff | del | rare genic      |
| 7 | 144546962 | 144839982 | B00BEIO  | aff   | dup | rare nongenic   |
| 7 | 144592154 | 144944871 | B00B0JH  | aff   | del | rare nongenic   |
| 7 | 152666982 | 152987365 | B009FS7  | aff   | dup | rare nongenic   |
| 7 | 154099909 | 154734715 | B00B0L8  | aff   | dup | rare genic      |
| 8 | 320328    | 12285893  | B00BEH9  | aff   | del | rare genic      |
| 8 | 395951    | 1120762   | B00BQR1  | aff   | dup | common genic    |
| 8 | 1073568   | 1291535   | B00AAAYE | unaff | dup | rare genic      |
| 8 | 2311920   | 2570171   | B009EEC  | unaff | dup | common nongenic |
| 8 | 2312456   | 2570171   | B009G71  | aff   | dup | common nongenic |
| 8 | 2312456   | 2570171   | B00B128  | aff   | dup | common nongenic |
| 8 | 2326943   | 2435037   | B00B0KS  | aff   | dup | common nongenic |
| 8 | 2326943   | 2570171   | B009EDZ  | unaff | dup | common nongenic |
| 8 | 2326943   | 2570171   | B009FNP  | aff   | dup | common nongenic |
| 8 | 2326943   | 2570171   | B00B0IA  | aff   | dup | common nongenic |
| 8 | 2326943   | 2570171   | B00B0RW  | aff   | dup | common nongenic |
| 8 | 2326943   | 2570171   | B00BE9N  | aff   | dup | common nongenic |
| 8 | 2326943   | 2570171   | B00BEAH  | aff   | dup | common nongenic |
| 8 | 2327064   | 2570171   | B00BDVO  | aff   | dup | common nongenic |
| 8 | 2327373   | 2570171   | B00AA9F  | unaff | dup | common nongenic |

|   |         |         |         |       |     |                   |
|---|---------|---------|---------|-------|-----|-------------------|
| 8 | 2327373 | 2570171 | B00B0PD | aff   | dup | common nongenetic |
| 8 | 2334306 | 2435771 | B00BQLJ | aff   | dup | common nongenetic |
| 8 | 2334306 | 2503143 | B00B0W2 | aff   | dup | common nongenetic |
| 8 | 2334306 | 2570171 | B009G8M | aff   | dup | common nongenetic |
| 8 | 2334306 | 2570171 | B00AAD3 | unaff | dup | common nongenetic |
| 8 | 2334306 | 2570171 | B00AAHB | unaff | dup | common nongenetic |
| 8 | 2334306 | 2570171 | B00AA9Y | unaff | dup | common nongenetic |
| 8 | 2334306 | 2570171 | B00B0SR | aff   | dup | common nongenetic |
| 8 | 2334306 | 2570171 | B00BEGT | aff   | dup | common nongenetic |
| 8 | 2334306 | 2570171 | B00BQNZ | aff   | dup | common nongenetic |
| 8 | 2532631 | 2633010 | B00BELP | aff   | del | rare nongenetic   |
| 8 | 4213998 | 4989886 | B00BDHO | aff   | dup | rare genic        |
| 8 | 4856110 | 4998641 | B00B13X | aff   | del | rare nongenetic   |
| 8 | 5290497 | 5417709 | B00AA9Y | unaff | del | rare nongenetic   |
| 8 | 5571782 | 5733260 | B00AA6V | unaff | del | rare nongenetic   |
| 8 | 5631076 | 5876113 | B00BEJ9 | aff   | del | common nongenetic |
| 8 | 5779846 | 6493357 | B00AAWR | unaff | dup | rare genic        |
| 8 | 5895729 | 6348637 | B00BEB0 | aff   | del | rare genic        |
| 8 | 6505951 | 6818932 | B009FXJ | aff   | del | rare genic        |
| 8 | 6642801 | 6820793 | B00B11L | aff   | dup | rare genic        |
| 8 | 7098652 | 7929028 | B00BDGZ | aff   | dup | rare genic        |
| 8 | 7098652 | 8033891 | B00BDIN | aff   | dup | rare genic        |
| 8 | 7098652 | 8064899 | B00BDIQ | aff   | dup | rare genic        |
| 8 | 7098652 | 8109345 | B00BDUQ | aff   | dup | rare genic        |
| 8 | 7165298 | 7929028 | B00BE6E | aff   | dup | rare genic        |



|   |          |          |         |       |     |                 |
|---|----------|----------|---------|-------|-----|-----------------|
| 8 | 7230125  | 7802723  | B00B0TB | aff   | dup | rare genic      |
| 8 | 7230125  | 8092342  | B00B112 | aff   | dup | rare genic      |
| 8 | 7295894  | 8068724  | B00BE39 | aff   | dup | rare genic      |
| 8 | 8135489  | 11935618 | B00B1B1 | aff   | del | rare genic      |
| 8 | 8356260  | 8485839  | B00B16B | aff   | del | rare nongenic   |
| 8 | 8871300  | 9769304  | B009G7B | aff   | dup | rare genic      |
| 8 | 9008510  | 9149982  | B00AB4U | unaff | del | rare genic      |
| 8 | 9073239  | 9360925  | B00BEJT | aff   | del | common genic    |
| 8 | 10131787 | 11935618 | B00BQQJ | aff   | dup | rare genic      |
| 8 | 11313952 | 11786054 | B00BQQ6 | aff   | del | rare genic      |
| 8 | 11642267 | 11738607 | B00BDS3 | aff   | del | rare genic      |
| 8 | 11673355 | 12042755 | B00B0YS | aff   | dup | rare genic      |
| 8 | 11934240 | 12072268 | B00BDRR | aff   | dup | rare genic      |
| 8 | 12046608 | 12456830 | B00B11F | aff   | dup | rare genic      |
| 8 | 13413432 | 13668055 | B00BEI0 | aff   | dup | rare genic      |
| 8 | 13626738 | 13816988 | B009FTJ | aff   | del | rare nongenic   |
| 8 | 15506367 | 15929497 | B00BEWO | aff   | dup | rare genic      |
| 8 | 15569638 | 15676399 | B00BDU2 | aff   | del | rare genic      |
| 8 | 15702127 | 15946967 | B009G84 | aff   | dup | rare nongenic   |
| 8 | 18564359 | 19828854 | B00BEHD | aff   | dup | rare genic      |
| 8 | 20001369 | 20256683 | B00BDLN | aff   | dup | rare genic      |
| 8 | 20691655 | 20864515 | B00BE07 | aff   | dup | common nongenic |
| 8 | 20698008 | 20864515 | B009EH5 | unaff | dup | rare nongenic   |
| 8 | 24551483 | 24912421 | B00BQMD | aff   | dup | rare genic      |
| 8 | 39351738 | 39506336 | B009FZI | aff   | del | rare genic      |

|   |           |           |         |       |     |               |
|---|-----------|-----------|---------|-------|-----|---------------|
| 8 | 43048383  | 43910848  | B00B0XJ | aff   | dup | rare genic    |
| 8 | 43143782  | 43910848  | B00B1AX | aff   | dup | rare genic    |
| 8 | 43274108  | 43868883  | B00B0VK | aff   | dup | rare genic    |
| 8 | 43592905  | 43868883  | B00BDNO | aff   | dup | rare nongenic |
| 8 | 43592905  | 43910848  | B00BDMC | aff   | dup | rare nongenic |
| 8 | 43592905  | 43957926  | B00BDNX | aff   | dup | rare nongenic |
| 8 | 43689385  | 43868883  | B00BDMU | aff   | dup | rare nongenic |
| 8 | 43689385  | 43957926  | B00BDMV | aff   | dup | rare nongenic |
| 8 | 47062007  | 48554848  | B00BEKH | aff   | dup | rare genic    |
| 8 | 47229654  | 48066866  | B00B0L7 | aff   | dup | rare genic    |
| 8 | 47339255  | 47526930  | B00BDNO | aff   | dup | rare nongenic |
| 8 | 53882866  | 54281947  | B00B0V2 | aff   | dup | rare genic    |
| 8 | 53882866  | 54305368  | B00B0YK | aff   | dup | rare genic    |
| 8 | 62747549  | 63387581  | B00B0OZ | aff   | dup | rare genic    |
| 8 | 68828486  | 69229906  | B00AB21 | unaff | del | rare genic    |
| 8 | 83141204  | 83652299  | B00B0WN | aff   | del | rare nongenic |
| 8 | 83170552  | 85042158  | B00B0U7 | aff   | del | rare nongenic |
| 8 | 85477395  | 86229096  | B00B0WZ | aff   | dup | rare genic    |
| 8 | 87256166  | 87403084  | B00BESG | aff   | dup | rare genic    |
| 8 | 89017941  | 89174612  | B00B0JJ | aff   | dup | rare genic    |
| 8 | 91701765  | 92157337  | B00BEK9 | aff   | del | rare genic    |
| 8 | 96587380  | 96779761  | B00AB4R | unaff | dup | rare genic    |
| 8 | 111714363 | 113184531 | B00BEIY | aff   | dup | rare nongenic |
| 8 | 117640909 | 117894249 | B00ABAW | unaff | dup | rare genic    |
| 8 | 121241442 | 123685278 | B00B0WK | aff   | del | rare genic    |

|   |           |           |         |       |     |                   |
|---|-----------|-----------|---------|-------|-----|-------------------|
| 8 | 137757137 | 137922366 | B009EDB | unaff | del | common nongenetic |
| 8 | 137757137 | 137922366 | B009GAF | aff   | del | common nongenetic |
| 8 | 137757137 | 137922366 | B00B0IK | aff   | del | common nongenetic |
| 8 | 137757137 | 137922366 | B00B0TJ | aff   | del | common nongenetic |
| 8 | 137757137 | 137922366 | B00B0U4 | aff   | del | common nongenetic |
| 8 | 137757137 | 137922366 | B00B10D | aff   | del | common nongenetic |
| 8 | 137757137 | 137922366 | B00B174 | aff   | del | common nongenetic |
| 8 | 137757137 | 137922366 | B00B1A3 | aff   | del | common nongenetic |
| 8 | 137757137 | 137922366 | B00B1BK | aff   | del | common nongenetic |
| 8 | 137757137 | 137922366 | B00BDJY | aff   | del | common nongenetic |
| 8 | 137757137 | 137922366 | B00BE1T | aff   | del | common nongenetic |
| 8 | 137757137 | 137922366 | B00BEHP | aff   | del | common nongenetic |
| 8 | 137757137 | 137922366 | B00BEWN | aff   | del | common nongenetic |
| 8 | 137757137 | 137922366 | B00BQL2 | aff   | del | common nongenetic |
| 8 | 137757137 | 137922366 | B00BQO5 | aff   | del | common nongenetic |
| 8 | 137757137 | 137922366 | B00BQOJ | aff   | del | common nongenetic |
| 8 | 137757137 | 137922366 | B00BQR1 | aff   | del | common nongenetic |
| 8 | 137757137 | 137923013 | B009EFW | unaff | del | common nongenetic |
| 8 | 137757137 | 137923013 | B00AAZ9 | unaff | del | common nongenetic |
| 8 | 137757137 | 137923013 | B00AB4Z | unaff | del | common nongenetic |
| 8 | 137757137 | 137923013 | B00AB52 | unaff | del | common nongenetic |
| 8 | 137757137 | 137923013 | B00AB5F | unaff | del | common nongenetic |
| 8 | 137757137 | 137923013 | B00ABB0 | unaff | del | common nongenetic |
| 8 | 137757137 | 137923013 | B00B0GQ | aff   | del | common nongenetic |
| 8 | 137757137 | 137923013 | B00B0JW | aff   | del | common nongenetic |

|   |           |           |         |       |     |                   |
|---|-----------|-----------|---------|-------|-----|-------------------|
| 8 | 137757137 | 137923013 | B00B0KB | aff   | del | common nongenetic |
| 8 | 137757137 | 137923013 | B00B11D | aff   | del | common nongenetic |
| 8 | 137757137 | 137923013 | B00B133 | aff   | del | common nongenetic |
| 8 | 137757137 | 137923013 | B00B13K | aff   | del | common nongenetic |
| 8 | 137757137 | 137923013 | B00B1BR | aff   | del | common nongenetic |
| 8 | 137757137 | 137923013 | B00BDZH | aff   | del | common nongenetic |
| 8 | 137757137 | 137923013 | B00BDZO | aff   | del | common nongenetic |
| 8 | 137757137 | 137923013 | B00BQP5 | aff   | del | common nongenetic |
| 8 | 137757137 | 137923013 | B00BQQ8 | aff   | del | common nongenetic |
| 8 | 137757137 | 137924480 | B00B1BV | aff   | del | common nongenetic |
| 8 | 137757137 | 137924480 | B00BE55 | aff   | del | common nongenetic |
| 8 | 137757137 | 137924480 | B00BE7S | aff   | del | common nongenetic |
| 8 | 137757137 | 137925454 | B009EEY | unaff | del | common nongenetic |
| 8 | 137757137 | 137925454 | B009EFF | unaff | del | common nongenetic |
| 8 | 137757137 | 137925454 | B009FO1 | aff   | del | common nongenetic |
| 8 | 137757137 | 137925454 | B009FO4 | aff   | del | common nongenetic |
| 8 | 137757137 | 137925454 | B009G2M | aff   | del | common nongenetic |
| 8 | 137757137 | 137925454 | B009G3G | aff   | del | common nongenetic |
| 8 | 137757137 | 137925454 | B009G8B | aff   | del | common nongenetic |
| 8 | 137757137 | 137925454 | B009GB0 | aff   | del | common nongenetic |
| 8 | 137757137 | 137925454 | B00AA9F | unaff | del | common nongenetic |
| 8 | 137757137 | 137925454 | B00AACT | unaff | del | common nongenetic |
| 8 | 137757137 | 137925454 | B00AAFD | unaff | del | common nongenetic |
| 8 | 137757137 | 137925454 | B00AAJH | unaff | del | common nongenetic |
| 8 | 137757137 | 137925454 | B00AAVC | unaff | del | common nongenetic |

|   |           |           |         |       |     |                   |
|---|-----------|-----------|---------|-------|-----|-------------------|
| 8 | 137757137 | 137925454 | B00AAWS | unaff | del | common nongenetic |
| 8 | 137757137 | 137925454 | B00AAXP | unaff | del | common nongenetic |
| 8 | 137757137 | 137925454 | B00AAYA | unaff | del | common nongenetic |
| 8 | 137757137 | 137925454 | B00AAYU | unaff | del | common nongenetic |
| 8 | 137757137 | 137925454 | B00AAZN | unaff | del | common nongenetic |
| 8 | 137757137 | 137925454 | B00AB1P | unaff | del | common nongenetic |
| 8 | 137757137 | 137925454 | B00ABD8 | unaff | del | common nongenetic |
| 8 | 137757137 | 137925454 | B00B0IM | aff   | del | common nongenetic |
| 8 | 137757137 | 137925454 | B00B0IT | aff   | del | common nongenetic |
| 8 | 137757137 | 137925454 | B00B0LC | aff   | del | common nongenetic |
| 8 | 137757137 | 137925454 | B00B0LE | aff   | del | common nongenetic |
| 8 | 137757137 | 137925454 | B00B0M8 | aff   | del | common nongenetic |
| 8 | 137757137 | 137925454 | B00B0PI | aff   | del | common nongenetic |
| 8 | 137757137 | 137925454 | B00B0SE | aff   | del | common nongenetic |
| 8 | 137757137 | 137925454 | B00B0T2 | aff   | del | common nongenetic |
| 8 | 137757137 | 137925454 | B00B0VT | aff   | del | common nongenetic |
| 8 | 137757137 | 137925454 | B00B0VU | aff   | del | common nongenetic |
| 8 | 137757137 | 137925454 | B00B0X1 | aff   | del | common nongenetic |
| 8 | 137757137 | 137925454 | B00B0XU | aff   | del | common nongenetic |
| 8 | 137757137 | 137925454 | B00B0XW | aff   | del | common nongenetic |
| 8 | 137757137 | 137925454 | B00B0Z5 | aff   | del | common nongenetic |
| 8 | 137757137 | 137925454 | B00B105 | aff   | del | common nongenetic |
| 8 | 137757137 | 137925454 | B00B106 | aff   | del | common nongenetic |
| 8 | 137757137 | 137925454 | B00B124 | aff   | del | common nongenetic |
| 8 | 137757137 | 137925454 | B00B15J | aff   | del | common nongenetic |

|   |           |           |         |     |     |                   |
|---|-----------|-----------|---------|-----|-----|-------------------|
| 8 | 137757137 | 137925454 | B00B16Y | aff | del | common nongenetic |
| 8 | 137757137 | 137925454 | B00B17A | aff | del | common nongenetic |
| 8 | 137757137 | 137925454 | B00B199 | aff | del | common nongenetic |
| 8 | 137757137 | 137925454 | B00B1AB | aff | del | common nongenetic |
| 8 | 137757137 | 137925454 | B00B1AF | aff | del | common nongenetic |
| 8 | 137757137 | 137925454 | B00B1B3 | aff | del | common nongenetic |
| 8 | 137757137 | 137925454 | B00B1CL | aff | del | common nongenetic |
| 8 | 137757137 | 137925454 | B00BDJJ | aff | del | common nongenetic |
| 8 | 137757137 | 137925454 | B00BDK8 | aff | del | common nongenetic |
| 8 | 137757137 | 137925454 | B00BDOD | aff | del | common nongenetic |
| 8 | 137757137 | 137925454 | B00BDUQ | aff | del | common nongenetic |
| 8 | 137757137 | 137925454 | B00BE0F | aff | del | common nongenetic |
| 8 | 137757137 | 137925454 | B00BE0W | aff | del | common nongenetic |
| 8 | 137757137 | 137925454 | B00BE16 | aff | del | common nongenetic |
| 8 | 137757137 | 137925454 | B00BE3V | aff | del | common nongenetic |
| 8 | 137757137 | 137925454 | B00BE7E | aff | del | common nongenetic |
| 8 | 137757137 | 137925454 | B00BE9E | aff | del | common nongenetic |
| 8 | 137757137 | 137925454 | B00BEDQ | aff | del | common nongenetic |
| 8 | 137757137 | 137925454 | B00BEFE | aff | del | common nongenetic |
| 8 | 137757137 | 137925454 | B00BEG3 | aff | del | common nongenetic |
| 8 | 137757137 | 137925454 | B00BEKE | aff | del | common nongenetic |
| 8 | 137757137 | 137925454 | B00BEL5 | aff | del | common nongenetic |
| 8 | 137757137 | 137925454 | B00BETL | aff | del | common nongenetic |
| 8 | 137757137 | 137925454 | B00BEU9 | aff | del | common nongenetic |
| 8 | 137757137 | 137925454 | B00BEUB | aff | del | common nongenetic |

|   |           |           |         |       |     |                   |
|---|-----------|-----------|---------|-------|-----|-------------------|
| 8 | 137757137 | 137925454 | B00BEUJ | aff   | del | common nongenetic |
| 8 | 137757137 | 137925454 | B00BQLJ | aff   | del | common nongenetic |
| 8 | 137757137 | 137925454 | B00BQM5 | aff   | del | common nongenetic |
| 8 | 137757137 | 137925454 | B00BQN4 | aff   | del | common nongenetic |
| 8 | 137757137 | 137925454 | B00BQN7 | aff   | del | common nongenetic |
| 8 | 137757137 | 137925454 | B00BQQ6 | aff   | del | common nongenetic |
| 8 | 137757137 | 137932941 | B00B15U | aff   | del | common nongenetic |
| 8 | 137757137 | 137932941 | B00BE0Z | aff   | del | common nongenetic |
| 8 | 137757137 | 137945584 | B00ABBB | unaff | del | common nongenetic |
| 8 | 137789577 | 137922366 | B009EG6 | unaff | del | common nongenetic |
| 8 | 137789577 | 137923013 | B00AABK | unaff | del | common nongenetic |
| 8 | 137789577 | 137923013 | B00AAGY | unaff | del | common nongenetic |
| 8 | 137789577 | 137923013 | B00AAHH | unaff | del | common nongenetic |
| 8 | 137789577 | 137923013 | B00AAJ3 | unaff | del | common nongenetic |
| 8 | 137789577 | 137923013 | B00B0G2 | aff   | del | common nongenetic |
| 8 | 137789577 | 137923013 | B00B0RM | aff   | del | common nongenetic |
| 8 | 137789577 | 137923013 | B00BDIS | aff   | del | common nongenetic |
| 8 | 137789577 | 137923013 | B00BDIT | aff   | del | common nongenetic |
| 8 | 137789577 | 137923013 | B00BE0L | aff   | del | common nongenetic |
| 8 | 137789577 | 137923013 | B00BE7F | aff   | del | common nongenetic |
| 8 | 137789577 | 137925454 | B009EFY | unaff | del | common nongenetic |
| 8 | 137789577 | 137925454 | B009FTG | aff   | del | common nongenetic |
| 8 | 137789577 | 137925454 | B009FWY | aff   | del | common nongenetic |
| 8 | 137789577 | 137925454 | B009FZ9 | aff   | del | common nongenetic |
| 8 | 137789577 | 137925454 | B009G1X | aff   | del | common nongenetic |

|   |           |           |         |       |     |                   |
|---|-----------|-----------|---------|-------|-----|-------------------|
| 8 | 137789577 | 137925454 | B009GB5 | aff   | del | common nongenetic |
| 8 | 137789577 | 137925454 | B00AA7L | unaff | del | common nongenetic |
| 8 | 137789577 | 137925454 | B00B0G6 | aff   | del | common nongenetic |
| 8 | 137789577 | 137925454 | B00B0JF | aff   | del | common nongenetic |
| 8 | 137789577 | 137925454 | B00B0K1 | aff   | del | common nongenetic |
| 8 | 137789577 | 137925454 | B00B0X3 | aff   | del | common nongenetic |
| 8 | 137789577 | 137925454 | B00B0XJ | aff   | del | common nongenetic |
| 8 | 137789577 | 137925454 | B00BDTS | aff   | del | common nongenetic |
| 8 | 137812725 | 137925454 | B009FQV | aff   | del | common nongenetic |
| 8 | 137814359 | 137925454 | B009G1I | aff   | del | common nongenetic |
| 8 | 137816874 | 137922366 | B00BDRA | aff   | del | common nongenetic |
| 8 | 137821787 | 137925454 | B00BEFA | aff   | del | common nongenetic |
| 8 | 137895996 | 138336165 | B00AB9U | unaff | dup | rare nongenetic   |
| 8 | 138115437 | 138344749 | B00AB5Y | unaff | dup | rare nongenetic   |
| 8 | 139806115 | 139945608 | B009G4G | aff   | dup | rare genic        |
| 8 | 144619949 | 144735442 | B00B19X | aff   | del | common genic      |
| 9 | 146659    | 418706    | B00BQRF | aff   | dup | common genic      |
| 9 | 155539    | 260422    | B00BEJ1 | aff   | dup | common genic      |
| 9 | 155539    | 262191    | B00B0IB | aff   | dup | common genic      |
| 9 | 155539    | 326186    | B00BEV9 | aff   | dup | common genic      |
| 9 | 195964    | 348932    | B00BEJ0 | aff   | dup | common genic      |
| 9 | 195964    | 358128    | B00B1AK | aff   | dup | common genic      |
| 9 | 234457    | 388673    | B00AB5E | unaff | dup | common genic      |
| 9 | 258740    | 416215    | B00BE1W | aff   | dup | common genic      |
| 9 | 287394    | 721332    | B00AAY0 | unaff | dup | common genic      |



|   |          |          |         |       |     |                 |
|---|----------|----------|---------|-------|-----|-----------------|
| 9 | 472282   | 607501   | B00BEBJ | aff   | dup | common genic    |
| 9 | 507715   | 619437   | B00BDUJ | aff   | dup | common genic    |
| 9 | 510940   | 922875   | B00B0SG | aff   | dup | common genic    |
| 9 | 522950   | 766739   | B00BDS6 | aff   | dup | common genic    |
| 9 | 543248   | 781067   | B00B0QU | aff   | dup | common genic    |
| 9 | 794436   | 952184   | B009G2Y | aff   | dup | rare genic      |
| 9 | 2939336  | 3093419  | B00BE1O | aff   | del | rare nongenic   |
| 9 | 6513056  | 6648900  | B00BDUD | aff   | del | rare genic      |
| 9 | 6772225  | 7007391  | B00BQRJ | aff   | dup | rare genic      |
| 9 | 7212495  | 7353648  | B00AAA4 | unaff | del | rare nongenic   |
| 9 | 8292580  | 8731389  | B00BEK3 | aff   | dup | rare genic      |
| 9 | 9391487  | 9546992  | B00BETJ | aff   | del | common genic    |
| 9 | 9464970  | 9606646  | B009EEI | unaff | del | rare genic      |
| 9 | 9793954  | 9905186  | B00B1AC | aff   | del | rare genic      |
| 9 | 11298220 | 11943279 | B00B166 | aff   | del | common nongenic |
| 9 | 11349656 | 11551438 | B00B13Y | aff   | del | rare nongenic   |
| 9 | 11538253 | 12032535 | B00B0UC | aff   | del | common nongenic |
| 9 | 11596348 | 11789681 | B009G41 | aff   | del | common nongenic |
| 9 | 11631257 | 11840283 | B00BEK9 | aff   | dup | rare nongenic   |
| 9 | 11641144 | 11925261 | B00AAZG | unaff | del | common nongenic |
| 9 | 11641144 | 11925261 | B00BEW2 | aff   | del | common nongenic |
| 9 | 11641144 | 11925261 | B00BQMT | aff   | del | common nongenic |
| 9 | 11704572 | 11926706 | B00B14Z | aff   | del | common nongenic |
| 9 | 11764095 | 12091436 | B00BEVR | aff   | del | common nongenic |
| 9 | 11786468 | 11975139 | B00AB75 | unaff | del | common nongenic |

|   |          |          |          |       |     |                   |
|---|----------|----------|----------|-------|-----|-------------------|
| 9 | 11815229 | 12000374 | B009EDY  | unaff | del | common nongenetic |
| 9 | 11828399 | 12061175 | B00BEWM  | aff   | del | common nongenetic |
| 9 | 11837376 | 12046279 | B00BQQY  | aff   | del | common nongenetic |
| 9 | 11877764 | 12177104 | B00AA86  | unaff | del | common nongenetic |
| 9 | 11893938 | 12025563 | B00AB6S  | unaff | del | common nongenetic |
| 9 | 11895556 | 12177104 | B00BEF6  | aff   | del | common nongenetic |
| 9 | 11905692 | 12054543 | B00BEVX  | aff   | del | common nongenetic |
| 9 | 11919890 | 12051324 | B009FOG  | aff   | del | common nongenetic |
| 9 | 11919890 | 12051324 | B00B0WN  | aff   | del | common nongenetic |
| 9 | 11919890 | 12051324 | B00BEDB  | aff   | del | common nongenetic |
| 9 | 11919890 | 12086410 | B00AAH6  | unaff | del | common nongenetic |
| 9 | 11936421 | 12075717 | B00AA8D  | unaff | del | common nongenetic |
| 9 | 11957114 | 12155758 | B00BQQM  | aff   | del | common nongenetic |
| 9 | 11966830 | 12117088 | B00BQNJ  | aff   | del | common nongenetic |
| 9 | 11986163 | 12117088 | B00AA8R  | unaff | del | common nongenetic |
| 9 | 11993252 | 12117088 | B00AB8I  | unaff | del | common nongenetic |
| 9 | 11993252 | 12117088 | B00B0PI  | aff   | del | common nongenetic |
| 9 | 11993252 | 12117088 | B00BEGV  | aff   | del | common nongenetic |
| 9 | 11993252 | 12117088 | B00BEVA  | aff   | del | common nongenetic |
| 9 | 11993252 | 12117088 | B00BQMN  | aff   | del | common nongenetic |
| 9 | 11993252 | 12341246 | B00B0ZB  | aff   | del | common nongenetic |
| 9 | 11997658 | 12158247 | B00B149  | aff   | del | common nongenetic |
| 9 | 12015939 | 12144939 | B00AB AQ | unaff | del | common nongenetic |
| 9 | 12015939 | 12152866 | B00AAGS  | unaff | del | common nongenetic |
| 9 | 12015939 | 12152866 | B00AB4P  | unaff | del | common nongenetic |

|   |          |          |         |       |     |                   |
|---|----------|----------|---------|-------|-----|-------------------|
| 9 | 12015939 | 12152866 | B00ABAR | unaff | del | common nongenetic |
| 9 | 12015939 | 12152866 | B00B0JU | aff   | del | common nongenetic |
| 9 | 12015939 | 12152866 | B00B0VM | aff   | del | common nongenetic |
| 9 | 12015939 | 12152866 | B00BE2L | aff   | del | common nongenetic |
| 9 | 12015939 | 12152866 | B00BESJ | aff   | del | common nongenetic |
| 9 | 12015939 | 12155758 | B00BDU1 | aff   | del | common nongenetic |
| 9 | 12057914 | 12177104 | B00B0Y9 | aff   | del | common nongenetic |
| 9 | 12085022 | 12257967 | B00B0QO | aff   | del | common nongenetic |
| 9 | 14842141 | 15049821 | B00B0L9 | aff   | del | rare genic        |
| 9 | 18117068 | 18292439 | B00B120 | aff   | dup | rare nongenetic   |
| 9 | 18741638 | 18985323 | B00BEHD | aff   | dup | common genic      |
| 9 | 18919692 | 19523872 | B00AB0M | unaff | dup | rare genic        |
| 9 | 19540467 | 20645564 | B00BQS2 | aff   | del | rare genic        |
| 9 | 20331734 | 20597376 | B00B11V | aff   | dup | rare genic        |
| 9 | 25306440 | 25408820 | B00BQMB | aff   | del | rare nongenetic   |
| 9 | 27114745 | 27224521 | B00AB67 | unaff | del | rare genic        |
| 9 | 27946578 | 28148881 | B009RKE | unaff | del | rare genic        |
| 9 | 28188623 | 28332179 | B00AA8E | unaff | del | rare genic        |
| 9 | 28188623 | 28332179 | B00B12K | aff   | del | common genic      |
| 9 | 28188623 | 28332179 | B00BQPU | aff   | del | common genic      |
| 9 | 28344327 | 28540930 | B00B0JH | aff   | del | rare genic        |
| 9 | 28532803 | 28650665 | B00B0JO | aff   | del | common genic      |
| 9 | 28584913 | 28751593 | B009EH4 | unaff | del | common genic      |
| 9 | 28584913 | 28751593 | B009G8Y | aff   | del | common genic      |
| 9 | 28584913 | 28751593 | B00AB8I | unaff | del | common genic      |

|   |           |           |         |       |     |                 |
|---|-----------|-----------|---------|-------|-----|-----------------|
| 9 | 28584913  | 28751593  | B00B10V | aff   | del | common genic    |
| 9 | 28584913  | 28751593  | B00BDIN | aff   | del | common genic    |
| 9 | 28584913  | 28751593  | B00BE6B | aff   | del | common genic    |
| 9 | 28584913  | 28751593  | B00BEJ1 | aff   | del | common genic    |
| 9 | 29886950  | 30058009  | B00AA7V | unaff | del | rare nongenic   |
| 9 | 30316115  | 30705245  | B00BEFW | aff   | del | rare nongenic   |
| 9 | 30913816  | 31106343  | B00AAZ6 | unaff | del | rare nongenic   |
| 9 | 31158918  | 31563759  | B009EDZ | unaff | del | common nongenic |
| 9 | 31282290  | 32115244  | B00AAFE | unaff | del | common nongenic |
| 9 | 31282431  | 32115244  | B00AB82 | unaff | del | common nongenic |
| 9 | 31302460  | 31668988  | B00B0QA | aff   | del | common nongenic |
| 9 | 76054586  | 76228779  | B00ABDE | unaff | del | rare nongenic   |
| 9 | 96217647  | 96386800  | B00BDJD | aff   | dup | rare genic      |
| 9 | 103869938 | 104102147 | B00AB7N | unaff | del | rare nongenic   |
| 9 | 104757911 | 105039017 | B00BDZP | aff   | dup | rare genic      |
| 9 | 115996089 | 116495996 | B00BQQ2 | aff   | dup | rare genic      |
| 9 | 117501644 | 117625271 | B00AA95 | unaff | del | rare nongenic   |
| 9 | 118565469 | 118681878 | B00B0V5 | aff   | del | rare genic      |
| 9 | 118673789 | 119055658 | B00BEJA | aff   | dup | rare genic      |
| 9 | 136608825 | 136802562 | B00BE6V | aff   | dup | rare genic      |
| 9 | 137288987 | 137392698 | B009G10 | aff   | dup | common nongenic |
| 9 | 137288987 | 137432359 | B00AA8P | unaff | dup | common nongenic |
| 9 | 137288987 | 137437985 | B00AACM | unaff | dup | common nongenic |
| 9 | 137288987 | 137437985 | B00B0NS | aff   | dup | common nongenic |
| 9 | 137288987 | 137445881 | B00BE3W | aff   | dup | common nongenic |

|    |           |           |         |       |     |                   |
|----|-----------|-----------|---------|-------|-----|-------------------|
| 9  | 137288987 | 137449867 | B009G19 | aff   | dup | common nongenetic |
| 9  | 137288987 | 137449867 | B009G94 | aff   | dup | common nongenetic |
| 9  | 137288987 | 137449867 | B00B13C | aff   | dup | common nongenetic |
| 9  | 137300158 | 137419318 | B00BE79 | aff   | dup | common nongenetic |
| 9  | 137300158 | 137454076 | B00BEEM | aff   | dup | common nongenetic |
| 9  | 137303340 | 137449867 | B00BDTL | aff   | dup | common nongenetic |
| 9  | 137333104 | 137449867 | B00AB5V | unaff | dup | common nongenetic |
| 10 | 1507243   | 3496070   | B00B0KY | aff   | dup | common genetic    |
| 10 | 2078596   | 2296308   | B00BEHN | aff   | del | rare nongenetic   |
| 10 | 2239005   | 2549338   | B00BQMX | aff   | del | rare genetic      |
| 10 | 2591820   | 3090437   | B00AB54 | unaff | dup | common nongenetic |
| 10 | 6730153   | 6876693   | B00ABAD | unaff | dup | rare genetic      |
| 10 | 6856490   | 7100192   | B00BDTR | aff   | del | rare genetic      |
| 10 | 19457187  | 19864912  | B00BEW4 | aff   | del | rare nongenetic   |
| 10 | 21326367  | 21705498  | B00BEU8 | aff   | dup | rare genetic      |
| 10 | 25587124  | 25832715  | B00B12O | aff   | del | rare genetic      |
| 10 | 36523153  | 36917060  | B00BQOV | aff   | dup | common nongenetic |
| 10 | 36683184  | 36899882  | B009EDA | unaff | dup | rare nongenetic   |
| 10 | 38858706  | 39029756  | B00B0RR | aff   | del | rare nongenetic   |
| 10 | 44529447  | 44679489  | B00AAA0 | unaff | dup | rare genetic      |
| 10 | 46185880  | 47241801  | B009G00 | aff   | dup | common genetic    |
| 10 | 46451204  | 47241801  | B00AA70 | unaff | dup | common genetic    |
| 10 | 46461598  | 47241801  | B00BE92 | aff   | dup | common genetic    |
| 10 | 46461598  | 47241801  | B00BEMG | aff   | dup | common genetic    |
| 10 | 46461598  | 47517300  | B00B0ZM | aff   | dup | common genetic    |

|    |          |          |         |       |     |                 |
|----|----------|----------|---------|-------|-----|-----------------|
| 10 | 46480602 | 47227878 | B00B006 | aff   | dup | common genic    |
| 10 | 46572587 | 47173952 | B00B0LO | aff   | dup | common genic    |
| 10 | 46777208 | 47232036 | B00BEE7 | aff   | dup | common genic    |
| 10 | 46811240 | 47173952 | B00BDU9 | aff   | dup | common genic    |
| 10 | 46811240 | 47173952 | B00BE25 | aff   | dup | common genic    |
| 10 | 47013328 | 47173952 | B009G2P | aff   | dup | common genic    |
| 10 | 47013328 | 47173952 | B00AAFJ | unaff | dup | common genic    |
| 10 | 47013328 | 47173952 | B00AAH1 | unaff | dup | common genic    |
| 10 | 47013328 | 47173952 | B00BDUB | aff   | dup | common genic    |
| 10 | 47013328 | 47173952 | B00BE0I | aff   | dup | common genic    |
| 10 | 47013328 | 47173952 | B00BQSO | aff   | dup | common genic    |
| 10 | 47013328 | 47220485 | B00BDGX | aff   | dup | common genic    |
| 10 | 47013328 | 47220485 | B00BE21 | aff   | dup | common genic    |
| 10 | 47013328 | 47221167 | B00AB75 | unaff | dup | common genic    |
| 10 | 47013328 | 47222495 | B009G13 | aff   | dup | common genic    |
| 10 | 47013328 | 47488045 | B00BDT2 | aff   | dup | common genic    |
| 10 | 47058066 | 47221167 | B00ABDE | unaff | dup | common genic    |
| 10 | 47065283 | 47173952 | B00AB94 | unaff | dup | common genic    |
| 10 | 47098898 | 47241801 | B00AA6F | unaff | dup | common genic    |
| 10 | 47920669 | 48262744 | B00BQRD | aff   | dup | rare genic      |
| 10 | 49833981 | 50122742 | B00BQRD | aff   | dup | rare genic      |
| 10 | 54868713 | 56401010 | B00ABCH | unaff | dup | rare genic      |
| 10 | 54868713 | 56404174 | B009EFC | unaff | dup | rare genic      |
| 10 | 56359184 | 56729696 | B00BE3W | aff   | dup | common nongenic |
| 10 | 56586549 | 56854523 | B00B0VD | aff   | del | rare nongenic   |

|    |           |           |         |       |     |               |
|----|-----------|-----------|---------|-------|-----|---------------|
| 10 | 56586549  | 56883032  | B009FP7 | aff   | del | rare nongenic |
| 10 | 57059346  | 57317002  | B00B0VV | aff   | dup | rare nongenic |
| 10 | 57402093  | 57946551  | B00B0JE | aff   | dup | rare genic    |
| 10 | 58845146  | 59059748  | B00BE9L | aff   | dup | rare nongenic |
| 10 | 61982455  | 62705248  | B00B15P | aff   | dup | rare genic    |
| 10 | 66562233  | 66757971  | B00AAWJ | unaff | dup | rare nongenic |
| 10 | 67628183  | 67752490  | B00B142 | aff   | del | rare genic    |
| 10 | 67628183  | 67752490  | B00BEL4 | aff   | del | rare genic    |
| 10 | 67798620  | 67999188  | B00B0FQ | aff   | del | common genic  |
| 10 | 67912678  | 68156906  | B00AAY6 | unaff | del | common genic  |
| 10 | 67924088  | 68118409  | B00AB6L | unaff | del | common genic  |
| 10 | 67987089  | 68100834  | B00B0LP | aff   | del | common genic  |
| 10 | 68045673  | 68240316  | B00AAA1 | unaff | del | common genic  |
| 10 | 68411841  | 68592248  | B00B0EJ | aff   | dup | rare genic    |
| 10 | 68411841  | 68592248  | B00B0XV | aff   | dup | rare genic    |
| 10 | 68411841  | 68592248  | B00BE0G | aff   | dup | rare genic    |
| 10 | 81631178  | 88728844  | B00BQM2 | aff   | del | rare genic    |
| 10 | 84212260  | 84394962  | B009G26 | aff   | dup | rare genic    |
| 10 | 84659783  | 86016182  | B00BQNN | aff   | del | rare genic    |
| 10 | 86823217  | 87179215  | B00BQQ6 | aff   | del | rare nongenic |
| 10 | 87034940  | 87802563  | B00AA6D | unaff | dup | rare genic    |
| 10 | 91560191  | 92026134  | B00BEHD | aff   | del | rare genic    |
| 10 | 92088268  | 92446054  | B00BE8Y | aff   | dup | rare nongenic |
| 10 | 124005452 | 124183171 | B009EES | unaff | dup | rare genic    |
| 10 | 126185965 | 126288175 | B00BE9J | aff   | del | rare genic    |

|    |           |           |         |       |     |                 |
|----|-----------|-----------|---------|-------|-----|-----------------|
| 10 | 132535023 | 132798458 | B00B19Q | aff   | dup | rare genic      |
| 10 | 133225079 | 133375338 | B00BEII | aff   | del | rare nongenic   |
| 10 | 134041801 | 134255031 | B009G1U | aff   | dup | rare genic      |
| 10 | 134496978 | 134671412 | B00BE6R | aff   | del | rare genic      |
| 10 | 134496978 | 134767824 | B00BE9F | aff   | del | rare genic      |
| 10 | 135092227 | 135229999 | B00AACT | unaff | dup | common genic    |
| 10 | 135092227 | 135230732 | B00AADT | unaff | dup | common genic    |
| 10 | 135094809 | 135229999 | B00B0LA | aff   | dup | common genic    |
| 10 | 135116379 | 135219044 | B00AAG6 | unaff | dup | common genic    |
| 10 | 135116379 | 135229924 | B009G06 | aff   | dup | common genic    |
| 10 | 135116379 | 135229999 | B00B0Q4 | aff   | dup | common genic    |
| 10 | 135116379 | 135230153 | B00AAYD | unaff | dup | common genic    |
| 10 | 135116379 | 135230732 | B00AAGE | unaff | dup | common genic    |
| 10 | 135116379 | 135230732 | B00B0Y4 | aff   | dup | common genic    |
| 10 | 135129800 | 135230732 | B00BEFV | aff   | del | rare genic      |
| 10 | 135156148 | 135284293 | B00BEII | aff   | del | rare genic      |
| 11 | 4763448   | 4865576   | B00B0II | aff   | del | rare genic      |
| 11 | 4763448   | 4865576   | B00BQL6 | aff   | del | rare genic      |
| 11 | 5400443   | 5523065   | B00B0XL | aff   | del | rare genic      |
| 11 | 32995669  | 33455044  | B00AB5X | unaff | dup | rare genic      |
| 11 | 37046345  | 37626962  | B00BE0C | aff   | dup | rare nongenic   |
| 11 | 40236939  | 40441554  | B00B0YJ | aff   | del | rare genic      |
| 11 | 40573300  | 40698945  | B00B1BE | aff   | del | common nongenic |
| 11 | 40595756  | 40701344  | B00AAX5 | unaff | del | common nongenic |
| 11 | 50021328  | 50669978  | B00B0W1 | aff   | dup | rare genic      |



|    |           |           |         |       |     |               |
|----|-----------|-----------|---------|-------|-----|---------------|
| 11 | 50052490  | 50669978  | B00BDZP | aff   | dup | rare genic    |
| 11 | 50288640  | 50578631  | B00BE9L | aff   | dup | rare genic    |
| 11 | 50288640  | 51171349  | B00BDMU | aff   | dup | rare genic    |
| 11 | 50288640  | 51212979  | B00BDNF | aff   | dup | rare genic    |
| 11 | 50288640  | 51285867  | B00BDNX | aff   | dup | rare genic    |
| 11 | 51077585  | 51228612  | B00B0J9 | aff   | dup | rare nongenic |
| 11 | 54453381  | 54729430  | B00AAHP | unaff | del | rare nongenic |
| 11 | 63559193  | 63891874  | B00BE9J | aff   | del | rare genic    |
| 11 | 63623535  | 63868504  | B00BE6R | aff   | del | rare genic    |
| 11 | 80580086  | 81771147  | B00B15H | aff   | del | rare genic    |
| 11 | 81070846  | 81328717  | B00BEK5 | aff   | dup | rare genic    |
| 11 | 81070846  | 81336393  | B00BQO6 | aff   | dup | rare genic    |
| 11 | 84014299  | 84465384  | B00B0XU | aff   | del | common genic  |
| 11 | 84028294  | 84161040  | B00AB8Q | unaff | del | rare genic    |
| 11 | 84943969  | 85262301  | B00BEJO | aff   | dup | rare genic    |
| 11 | 85965935  | 86168228  | B009G34 | aff   | del | rare genic    |
| 11 | 87717127  | 89079879  | B00B158 | aff   | del | rare genic    |
| 11 | 89657936  | 89923184  | B00AB9V | unaff | del | rare nongenic |
| 11 | 97225890  | 97848847  | B009FQV | aff   | del | rare nongenic |
| 11 | 100228726 | 100334730 | B009FRG | aff   | del | rare genic    |
| 11 | 103481503 | 103679909 | B00AAAI | unaff | del | rare genic    |
| 11 | 104077072 | 104322127 | B00AA75 | unaff | del | rare genic    |
| 11 | 126997762 | 127256729 | B00BDS6 | aff   | del | rare nongenic |
| 11 | 130366454 | 130974721 | B00BEIJ | aff   | dup | rare genic    |
| 11 | 132329581 | 132769219 | B00BQLM | aff   | dup | rare genic    |

|    |           |           |         |       |     |                 |
|----|-----------|-----------|---------|-------|-----|-----------------|
| 11 | 133854125 | 134106222 | B00AAAE | unaff | dup | common genic    |
| 11 | 133854125 | 134178906 | B009FNV | aff   | dup | common genic    |
| 11 | 133854125 | 134211890 | B009G8P | aff   | dup | common genic    |
| 11 | 133854125 | 134226681 | B00AABH | unaff | dup | common genic    |
| 11 | 133859037 | 134056910 | B00AAC1 | unaff | dup | common genic    |
| 11 | 133859037 | 134106222 | B00BEM0 | aff   | dup | common genic    |
| 11 | 133859037 | 134203586 | B00B1BP | aff   | dup | common genic    |
| 11 | 133859037 | 134226681 | B00ABCC | unaff | dup | common genic    |
| 11 | 133859037 | 134226681 | B00BEJY | aff   | dup | common genic    |
| 11 | 133859858 | 134106222 | B009FP4 | aff   | dup | common genic    |
| 11 | 133859858 | 134226681 | B00B1A2 | aff   | dup | common genic    |
| 11 | 133861485 | 134106222 | B00BQQA | aff   | dup | common genic    |
| 11 | 133900452 | 134106222 | B00B1B1 | aff   | dup | common nongenic |
| 11 | 133900452 | 134239205 | B00BE1K | aff   | dup | common nongenic |
| 11 | 133909403 | 134147842 | B00BE4B | aff   | dup | common nongenic |
| 11 | 133909403 | 134226681 | B00B13V | aff   | dup | common nongenic |
| 11 | 133917949 | 134106222 | B00BE7L | aff   | dup | common nongenic |
| 11 | 133922969 | 134226681 | B009RKD | unaff | dup | common nongenic |
| 11 | 133927963 | 134226681 | B00BET9 | aff   | dup | common nongenic |
| 11 | 134006413 | 134117064 | B00BEEW | aff   | dup | common nongenic |
| 11 | 134069023 | 134211890 | B00BEUL | aff   | dup | common nongenic |
| 11 | 134224279 | 134349020 | B00BE9F | aff   | dup | common nongenic |
| 12 | 7544580   | 7916533   | B00B0L7 | aff   | dup | rare genic      |
| 12 | 7891603   | 8014573   | B00B14A | aff   | dup | rare genic      |
| 12 | 20898985  | 21296099  | B00BE4P | aff   | del | rare genic      |

|    |          |          |         |       |     |                 |
|----|----------|----------|---------|-------|-----|-----------------|
| 12 | 24835636 | 24968472 | B00BQS2 | aff   | dup | rare genic      |
| 12 | 27205351 | 27680155 | B00BEGB | aff   | del | rare genic      |
| 12 | 27229452 | 27680053 | B00BE3T | aff   | dup | rare genic      |
| 12 | 29050633 | 29190816 | B00B1CR | aff   | del | rare nongenic   |
| 12 | 31152226 | 31293957 | B00BDJ5 | aff   | dup | rare nongenic   |
| 12 | 31152226 | 31298174 | B00B1AD | aff   | dup | rare nongenic   |
| 12 | 33415349 | 33874675 | B00BELP | aff   | dup | rare genic      |
| 12 | 33415349 | 34099685 | B009FUJ | aff   | dup | rare genic      |
| 12 | 33415349 | 34194376 | B00BE1P | aff   | dup | rare genic      |
| 12 | 33415349 | 34194376 | B00BE97 | aff   | dup | rare genic      |
| 12 | 33415349 | 34249752 | B00B0U5 | aff   | dup | common genic    |
| 12 | 33415349 | 34693609 | B00B19L | aff   | dup | common genic    |
| 12 | 33415349 | 34693609 | B00BEFU | aff   | dup | common genic    |
| 12 | 33422705 | 34565140 | B00BEBE | aff   | dup | common genic    |
| 12 | 33450791 | 34603463 | B00B0ZR | aff   | dup | common genic    |
| 12 | 33530062 | 33892253 | B00B0J8 | aff   | dup | rare nongenic   |
| 12 | 34248290 | 34747647 | B00AA7J | unaff | dup | common nongenic |
| 12 | 36270798 | 36718276 | B00BDNX | aff   | dup | rare nongenic   |
| 12 | 38947548 | 39153600 | B00AA5M | unaff | dup | rare genic      |
| 12 | 40525442 | 41116770 | B00B0LD | aff   | dup | rare genic      |
| 12 | 42641064 | 43834285 | B00BQOB | aff   | del | rare genic      |
| 12 | 43024722 | 43537377 | B00BEE0 | aff   | dup | rare genic      |
| 12 | 53595383 | 54450001 | B009G71 | aff   | dup | rare genic      |
| 12 | 66264915 | 66482939 | B00AB7F | unaff | dup | rare genic      |
| 12 | 72680307 | 76001631 | B00B0WQ | aff   | del | rare genic      |

|    |           |           |         |       |     |               |
|----|-----------|-----------|---------|-------|-----|---------------|
| 12 | 76463828  | 76670293  | B009GBC | aff   | del | rare nongenic |
| 12 | 82566240  | 82974955  | B00B0KL | aff   | dup | rare nongenic |
| 12 | 84949739  | 85271857  | B00B1AY | aff   | del | rare genic    |
| 12 | 114737218 | 115007688 | B00B13W | aff   | dup | rare genic    |
| 12 | 125966298 | 126160067 | B009G71 | aff   | dup | rare nongenic |
| 12 | 126151300 | 126355359 | B00AB5J | unaff | dup | rare nongenic |
| 12 | 127407050 | 128922645 | B00AAZE | unaff | dup | rare genic    |
| 12 | 127731004 | 127870322 | B00AB1H | unaff | dup | rare genic    |
| 12 | 129096937 | 129772302 | B00BEGH | aff   | dup | rare genic    |
| 12 | 131262677 | 131500463 | B00BDNX | aff   | dup | rare genic    |
| 12 | 131322055 | 131579967 | B00B15U | aff   | dup | rare genic    |
| 13 | 19699273  | 19986717  | B009EDK | unaff | del | rare genic    |
| 13 | 19710563  | 19903776  | B00AB9U | unaff | del | rare genic    |
| 13 | 19722043  | 19993720  | B009EG0 | unaff | del | rare genic    |
| 13 | 20510791  | 20776779  | B00BDL6 | aff   | dup | rare genic    |
| 13 | 22466143  | 23813555  | B00BDMC | aff   | del | rare genic    |
| 13 | 54037598  | 61600894  | B00BEUD | aff   | del | rare genic    |
| 13 | 54690941  | 55434151  | B00AAAN | unaff | del | rare nongenic |
| 13 | 56141184  | 56470779  | B00BE1P | aff   | dup | rare nongenic |
| 13 | 63251062  | 64233887  | B00BQQT | aff   | dup | rare nongenic |
| 13 | 63330923  | 63834244  | B00B0X7 | aff   | del | rare nongenic |
| 13 | 63330923  | 63834244  | B00B0ZN | aff   | del | rare nongenic |
| 13 | 68680362  | 69362235  | B00BET7 | aff   | del | rare genic    |
| 13 | 69735856  | 69870784  | B009FN1 | aff   | del | rare nongenic |
| 13 | 72100371  | 73111539  | B00BDZT | aff   | dup | rare genic    |

|    |           |           |          |       |     |               |
|----|-----------|-----------|----------|-------|-----|---------------|
| 13 | 90843580  | 91359715  | B00B0X3  | aff   | dup | rare genic    |
| 13 | 90859879  | 91093338  | B00BDYW  | aff   | del | rare genic    |
| 13 | 93779554  | 94517495  | B00BEIB  | aff   | dup | rare genic    |
| 13 | 94870264  | 95099129  | B00B12N  | aff   | dup | rare genic    |
| 13 | 100320971 | 100435410 | B00BE1R  | aff   | del | rare nongenic |
| 13 | 113571085 | 113861908 | B00BE6R  | aff   | del | rare genic    |
| 14 | 18471281  | 18719523  | B009G7W  | aff   | dup | rare genic    |
| 14 | 18498048  | 18632978  | B00BEKY  | aff   | dup | rare genic    |
| 14 | 18501168  | 18825515  | B00BE2P  | aff   | dup | common genic  |
| 14 | 18506200  | 19083623  | B00BDLJ  | aff   | dup | common genic  |
| 14 | 18506200  | 19101771  | B00B11D  | aff   | dup | common genic  |
| 14 | 18684568  | 19502504  | B00AAAYE | unaff | dup | common genic  |
| 14 | 19175741  | 19491534  | B00BEEK  | aff   | dup | common genic  |
| 14 | 19179369  | 19494347  | B00BDIN  | aff   | dup | common genic  |
| 14 | 19283777  | 19488485  | B00AAFJ  | unaff | dup | common genic  |
| 14 | 19283777  | 19491534  | B00BEFJ  | aff   | dup | common genic  |
| 14 | 19283777  | 19494347  | B009FRS  | aff   | dup | common genic  |
| 14 | 19283777  | 19494347  | B00AA6P  | unaff | dup | common genic  |
| 14 | 19283777  | 19494347  | B00AB5O  | unaff | dup | common genic  |
| 14 | 19283777  | 19494347  | B00B0VJ  | aff   | dup | common genic  |
| 14 | 19283777  | 19494347  | B00BDS9  | aff   | dup | common genic  |
| 14 | 19283777  | 19494347  | B00BDV5  | aff   | dup | common genic  |
| 14 | 19283777  | 19494347  | B00BQOE  | aff   | dup | common genic  |
| 14 | 19283777  | 19494891  | B00BEUT  | aff   | dup | common genic  |
| 14 | 19375271  | 19494891  | B00ABBB  | unaff | dup | common genic  |

|    |          |          |         |       |     |                 |
|----|----------|----------|---------|-------|-----|-----------------|
| 14 | 19946093 | 20178749 | B00B1B2 | aff   | dup | rare genic      |
| 14 | 21676444 | 21788239 | B00BE33 | aff   | del | rare nongenic   |
| 14 | 21764766 | 21866158 | B00BEMW | aff   | del | rare nongenic   |
| 14 | 21834952 | 21949578 | B00B0V4 | aff   | del | rare nongenic   |
| 14 | 21838610 | 21949578 | B00B1C4 | aff   | del | rare nongenic   |
| 14 | 21842503 | 21949578 | B009G7O | aff   | del | rare nongenic   |
| 14 | 27165663 | 27292951 | B00AAJ  | unaff | dup | rare genic      |
| 14 | 39027188 | 39277773 | B00AA7B | unaff | del | common nongenic |
| 14 | 39049504 | 39234020 | B00B18V | aff   | del | common nongenic |
| 14 | 39881425 | 41953089 | B00B0WR | aff   | dup | rare genic      |
| 14 | 40973264 | 41395425 | B00BDZF | aff   | del | rare genic      |
| 14 | 42298099 | 44240696 | B009EFO | unaff | dup | common genic    |
| 14 | 42671419 | 43218387 | B00AAAD | unaff | dup | common nongenic |
| 14 | 42892349 | 43317491 | B00AACT | unaff | dup | common nongenic |
| 14 | 42892349 | 43317491 | B00AB9V | unaff | dup | common nongenic |
| 14 | 42892349 | 43317491 | B00BQO3 | aff   | dup | common nongenic |
| 14 | 42897456 | 43317491 | B00AA7C | unaff | dup | common nongenic |
| 14 | 42897456 | 43317491 | B00B14G | aff   | dup | common nongenic |
| 14 | 42897456 | 43320843 | B009G4M | aff   | dup | common nongenic |
| 14 | 42897456 | 43320843 | B00B15E | aff   | dup | common nongenic |
| 14 | 42897456 | 43320843 | B00BEKP | aff   | dup | common nongenic |
| 14 | 43700245 | 44240696 | B009EFO | unaff | del | rare genic      |
| 14 | 46027672 | 46306014 | B00BOP6 | aff   | del | rare genic      |
| 14 | 46040054 | 46826337 | B00BE3E | aff   | dup | rare genic      |
| 14 | 75905710 | 76088888 | B00BE8E | aff   | dup | rare genic      |

|    |           |           |         |       |     |                 |
|----|-----------|-----------|---------|-------|-----|-----------------|
| 14 | 86938281  | 87258639  | B00B0RP | aff   | dup | rare nongenetic |
| 14 | 105762823 | 105874604 | B00B0LD | aff   | del | common genic    |
| 14 | 105776041 | 105878201 | B00AA7U | unaff | del | common genic    |
| 15 | 18461479  | 18832088  | B00B111 | aff   | dup | common genic    |
| 15 | 18461479  | 19374161  | B00BDRP | aff   | dup | common genic    |
| 15 | 18461479  | 19425999  | B00BQNB | aff   | dup | common genic    |
| 15 | 18461479  | 20096959  | B00BQNM | aff   | dup | common genic    |
| 15 | 18486021  | 21065954  | B009FZI | aff   | dup | common genic    |
| 15 | 18502460  | 20032783  | B00BEW4 | aff   | dup | common genic    |
| 15 | 18653658  | 20096959  | B00ABEG | unaff | del | common genic    |
| 15 | 18665968  | 18893274  | B00AA5L | unaff | dup | common genic    |
| 15 | 18665968  | 20635884  | B00AAIY | unaff | dup | common genic    |
| 15 | 18693443  | 19466775  | B009FZI | aff   | dup | common genic    |
| 15 | 18703266  | 19365466  | B00BQQD | aff   | dup | common genic    |
| 15 | 18756416  | 18893274  | B00AAJO | unaff | dup | common genic    |
| 15 | 18802207  | 21065954  | B00BE3D | aff   | del | common genic    |
| 15 | 18805676  | 19205998  | B00B0HD | aff   | dup | common genic    |
| 15 | 18809823  | 19525130  | B00BE7M | aff   | dup | common genic    |
| 15 | 18816070  | 20096959  | B00BQNC | aff   | dup | common genic    |
| 15 | 18818086  | 19300575  | B00BDH4 | aff   | del | common genic    |
| 15 | 18820706  | 19228416  | B00AAXL | unaff | del | common genic    |
| 15 | 18822301  | 19525130  | B00BELR | aff   | dup | common genic    |
| 15 | 18835861  | 20032783  | B00BE0C | aff   | dup | common genic    |
| 15 | 18837563  | 20635884  | B00BE8M | aff   | del | common genic    |
| 15 | 18844407  | 19193121  | B00BEGD | aff   | del | common genic    |

|    |          |          |         |       |     |              |
|----|----------|----------|---------|-------|-----|--------------|
| 15 | 18844407 | 19228416 | B00B15D | aff   | del | common genic |
| 15 | 18844407 | 19266749 | B009G20 | aff   | del | common genic |
| 15 | 18844407 | 19365466 | B00AB7L | unaff | del | common genic |
| 15 | 18844407 | 19365466 | B00B0G6 | aff   | del | common genic |
| 15 | 18844407 | 19374161 | B00AB53 | unaff | del | common genic |
| 15 | 18844407 | 19463126 | B009G8Y | aff   | del | common genic |
| 15 | 18844407 | 19463126 | B00BE41 | aff   | del | common genic |
| 15 | 18844407 | 19489173 | B009FU7 | aff   | del | common genic |
| 15 | 18844407 | 19489173 | B00BQQS | aff   | del | common genic |
| 15 | 18844407 | 19494067 | B00BEHJ | aff   | del | common genic |
| 15 | 18844407 | 19494067 | B00BQLU | aff   | del | common genic |
| 15 | 18844407 | 19494732 | B00BE5F | aff   | del | common genic |
| 15 | 18844407 | 19519922 | B00BEJA | aff   | del | common genic |
| 15 | 18844407 | 19524118 | B00BQQ8 | aff   | del | common genic |
| 15 | 18844407 | 20096959 | B00AAWW | unaff | del | common genic |
| 15 | 18846305 | 19205998 | B00B0F8 | aff   | del | common genic |
| 15 | 18846305 | 19216443 | B00AA8T | unaff | del | common genic |
| 15 | 18846305 | 19365466 | B00B0ID | aff   | del | common genic |
| 15 | 18883470 | 19524118 | B00BEBZ | aff   | del | common genic |
| 15 | 19190969 | 20008195 | B00AAJS | unaff | dup | common genic |
| 15 | 19190969 | 20317047 | B009G6P | aff   | dup | common genic |
| 15 | 19294091 | 20096959 | B00B0LZ | aff   | dup | common genic |
| 15 | 19501536 | 20096959 | B00BECH | aff   | dup | common genic |
| 15 | 19767013 | 19884899 | B00AAV4 | unaff | del | common genic |
| 15 | 19767013 | 20041666 | B00BDK0 | aff   | dup | common genic |



|    |          |          |         |       |     |              |
|----|----------|----------|---------|-------|-----|--------------|
| 15 | 19767013 | 20096959 | B00B10G | aff   | dup | common genic |
| 15 | 19767013 | 20096959 | B00B17P | aff   | dup | common genic |
| 15 | 19767013 | 20096959 | B00BEG4 | aff   | dup | common genic |
| 15 | 19767013 | 20096959 | B00BEIN | aff   | dup | common genic |
| 15 | 19772657 | 20032783 | B00B1B8 | aff   | dup | common genic |
| 15 | 19772657 | 20092831 | B00BEGT | aff   | dup | common genic |
| 15 | 19772657 | 20096959 | B00BQNN | aff   | dup | common genic |
| 15 | 19776596 | 20049770 | B00AA5L | unaff | dup | common genic |
| 15 | 19776596 | 20079981 | B00BE0G | aff   | dup | common genic |
| 15 | 19776596 | 20079981 | B00BEFI | aff   | dup | common genic |
| 15 | 19776596 | 20096959 | B009EBY | unaff | dup | common genic |
| 15 | 19784528 | 20096959 | B009EDV | unaff | dup | common genic |
| 15 | 19791742 | 20096959 | B00BDS5 | aff   | dup | common genic |
| 15 | 19795240 | 20096959 | B00B0WR | aff   | dup | common genic |
| 15 | 19795240 | 20300462 | B00BQQD | aff   | dup | common genic |
| 15 | 19798349 | 20096959 | B00B0SS | aff   | dup | common genic |
| 15 | 19798349 | 20096959 | B00B0ZY | aff   | dup | common genic |
| 15 | 19798947 | 20093718 | B00B0QP | aff   | del | common genic |
| 15 | 19799155 | 20090401 | B00B192 | aff   | dup | common genic |
| 15 | 19800360 | 20096959 | B00AAJO | unaff | dup | common genic |
| 15 | 19800883 | 20092831 | B00BE2F | aff   | dup | common genic |
| 15 | 19800883 | 20096959 | B00B0XT | aff   | dup | common genic |
| 15 | 19821672 | 20096959 | B00BQS1 | aff   | dup | common genic |
| 15 | 19845386 | 20093718 | B00B0LW | aff   | dup | common genic |
| 15 | 19858018 | 20096959 | B00B0OZ | aff   | del | common genic |

|    |          |          |         |       |     |              |
|----|----------|----------|---------|-------|-----|--------------|
| 15 | 19860145 | 20096959 | B00B19E | aff   | dup | common genic |
| 15 | 19864664 | 20096959 | B00BDIE | aff   | dup | common genic |
| 15 | 19871292 | 20079981 | B00B11O | aff   | dup | common genic |
| 15 | 19874650 | 20090575 | B00BEL5 | aff   | dup | common genic |
| 15 | 19874650 | 20096959 | B00BQRB | aff   | dup | common genic |
| 15 | 19877729 | 20084212 | B00B126 | aff   | del | common genic |
| 15 | 19879123 | 20096959 | B00B0V5 | aff   | dup | common genic |
| 15 | 19881409 | 20094603 | B00AA9U | unaff | dup | common genic |
| 15 | 19881409 | 20096959 | B00BE8W | aff   | dup | common genic |
| 15 | 19881981 | 20096959 | B009FZU | aff   | dup | common genic |
| 15 | 19883167 | 20096959 | B00BELK | aff   | dup | common genic |
| 15 | 19883167 | 20249841 | B00BESD | aff   | dup | common genic |
| 15 | 19950423 | 20096959 | B00AAXZ | unaff | dup | common genic |
| 15 | 19950423 | 20096959 | B00AAYA | unaff | dup | common genic |
| 15 | 19950423 | 20096959 | B00BELU | aff   | dup | common genic |
| 15 | 19950423 | 20096959 | B00BQNB | aff   | dup | common genic |
| 15 | 19951198 | 20093718 | B00AA95 | unaff | dup | common genic |
| 15 | 19951198 | 20096959 | B00B14Y | aff   | dup | common genic |
| 15 | 19951198 | 20096959 | B00BQMZ | aff   | dup | common genic |
| 15 | 19953375 | 20096959 | B00AAXI | unaff | del | common genic |
| 15 | 19957667 | 20096959 | B00BDK8 | aff   | dup | common genic |
| 15 | 19958555 | 20096959 | B00AB1Z | unaff | del | common genic |
| 15 | 19982306 | 20096959 | B00B10K | aff   | dup | common genic |
| 15 | 20303106 | 20635884 | B00BDI4 | aff   | del | rare genic   |
| 15 | 20306549 | 20635884 | B00AACT | unaff | dup | common genic |

|    |          |          |         |       |     |                 |
|----|----------|----------|---------|-------|-----|-----------------|
| 15 | 20314760 | 20635884 | B00B0S4 | aff   | del | rare genic      |
| 15 | 20314760 | 20635884 | B00BDZI | aff   | del | rare genic      |
| 15 | 20314760 | 20635884 | B00BEW1 | aff   | del | rare genic      |
| 15 | 20321135 | 20618177 | B00BQO9 | aff   | del | rare genic      |
| 15 | 20384417 | 20614243 | B00B0NT | aff   | dup | common genic    |
| 15 | 20384417 | 20635884 | B00BE6E | aff   | del | rare genic      |
| 15 | 20384417 | 20635884 | B00BEDB | aff   | del | rare genic      |
| 15 | 20384417 | 20635884 | B00BEG0 | aff   | del | rare genic      |
| 15 | 20388584 | 20618177 | B00BQN2 | aff   | del | rare genic      |
| 15 | 20388584 | 20629449 | B00BEF1 | aff   | del | rare genic      |
| 15 | 20388584 | 20667673 | B00B101 | aff   | dup | common genic    |
| 15 | 20391412 | 20635884 | B00BE79 | aff   | dup | common genic    |
| 15 | 20401830 | 20605280 | B00BE1O | aff   | dup | common genic    |
| 15 | 20401830 | 20618177 | B00BEAA | aff   | dup | common genic    |
| 15 | 21905523 | 22048665 | B009FZ9 | aff   | del | rare genic      |
| 15 | 22134751 | 22296944 | B00AAA7 | unaff | dup | common nongenic |
| 15 | 22134751 | 22296944 | B00BET9 | aff   | dup | common nongenic |
| 15 | 28705181 | 29403966 | B00BDV0 | aff   | dup | common genic    |
| 15 | 28723577 | 29234640 | B00BQQV | aff   | dup | common genic    |
| 15 | 28750810 | 30233069 | B009GB2 | aff   | dup | common genic    |
| 15 | 28797383 | 30231488 | B00BEKY | aff   | del | rare genic      |
| 15 | 28797383 | 30234454 | B00AA7W | unaff | dup | common genic    |
| 15 | 28816548 | 30231488 | B00BE1P | aff   | del | rare genic      |
| 15 | 29807358 | 30189338 | B009G5V | aff   | dup | common genic    |
| 15 | 29807358 | 30231488 | B009FW4 | aff   | dup | common genic    |

|    |          |          |         |       |     |               |
|----|----------|----------|---------|-------|-----|---------------|
| 15 | 29807358 | 30231488 | B00BEIU | aff   | del | rare genic    |
| 15 | 29807358 | 30234454 | B00AB8M | unaff | dup | common genic  |
| 15 | 29807358 | 30239240 | B009EEV | unaff | dup | common genic  |
| 15 | 29807358 | 30239240 | B009RKC | unaff | dup | common genic  |
| 15 | 29807358 | 30400921 | B00B0RJ | aff   | dup | common genic  |
| 15 | 29807358 | 30417617 | B00AAVB | unaff | dup | common genic  |
| 15 | 29816096 | 30233069 | B009FUJ | aff   | dup | common genic  |
| 15 | 29863575 | 30234454 | B009RL7 | unaff | dup | common genic  |
| 15 | 29870041 | 30319628 | B00BDZF | aff   | dup | common genic  |
| 15 | 29883814 | 30286980 | B009FNA | aff   | dup | common genic  |
| 15 | 29949527 | 30234454 | B00AB5Z | unaff | dup | common genic  |
| 15 | 29960537 | 30231488 | B00BE1D | aff   | dup | common genic  |
| 15 | 29960537 | 30239240 | B00AABT | unaff | dup | common genic  |
| 15 | 29960537 | 30239240 | B00BDHM | aff   | dup | common genic  |
| 15 | 30699032 | 31100290 | B00BE3P | aff   | dup | rare genic    |
| 15 | 30706958 | 32602161 | B00B0R8 | aff   | dup | rare genic    |
| 15 | 30711941 | 32363040 | B00B130 | aff   | dup | rare genic    |
| 15 | 32492447 | 32606319 | B00B11M | aff   | del | rare genic    |
| 15 | 34236247 | 34488568 | B00BE1Q | aff   | dup | rare nongenic |
| 15 | 47492033 | 49245394 | B00B168 | aff   | del | rare genic    |
| 15 | 55431559 | 55555363 | B00ABA3 | unaff | dup | rare genic    |
| 15 | 55431559 | 55563118 | B00BQQ6 | aff   | dup | common genic  |
| 15 | 55432269 | 55621184 | B00B10O | aff   | dup | common genic  |
| 15 | 55435304 | 55563118 | B00BE16 | aff   | dup | common genic  |
| 15 | 81011209 | 82625167 | B00B0RL | aff   | del | rare genic    |

|    |          |          |         |       |     |                 |
|----|----------|----------|---------|-------|-----|-----------------|
| 15 | 83626571 | 83950163 | B00BQO6 | aff   | dup | rare genic      |
| 15 | 83714794 | 83944508 | B00B0IN | aff   | dup | rare genic      |
| 15 | 90919508 | 91913285 | B00BE88 | aff   | dup | rare genic      |
| 15 | 93438153 | 94211693 | B00BE21 | aff   | del | rare genic      |
| 15 | 99846751 | 99983326 | B00BEV4 | aff   | dup | rare genic      |
| 16 | 6499063  | 7132653  | B00AAHG | unaff | del | common genic    |
| 16 | 6545214  | 6653778  | B00BEIC | aff   | del | common genic    |
| 16 | 6646253  | 7034208  | B00B0IF | aff   | del | common genic    |
| 16 | 15192528 | 16197033 | B00B10P | aff   | del | rare genic      |
| 16 | 15192528 | 16197033 | B00BE4C | aff   | dup | rare genic      |
| 16 | 15192528 | 16197033 | B00BEJY | aff   | dup | rare genic      |
| 16 | 15387380 | 16165674 | B00B1AT | aff   | dup | candidate       |
| 16 | 15387380 | 16197033 | B00BEVJ | aff   | dup | rare genic      |
| 16 | 17291625 | 17789520 | B00B1AT | aff   | dup | rare genic      |
| 16 | 17391397 | 18174650 | B00B0HI | aff   | dup | rare genic      |
| 16 | 21856623 | 22331199 | B009FOS | aff   | del | rare genic      |
| 16 | 23841800 | 24110116 | B00BE24 | aff   | del | rare genic      |
| 16 | 31009822 | 31139990 | B00BE2Q | aff   | del | rare genic      |
| 16 | 31947437 | 33235239 | B00BEHD | aff   | dup | rare genic      |
| 16 | 32380006 | 32805913 | B00B0M4 | aff   | dup | rare genic      |
| 16 | 32380006 | 33195302 | B00B12Z | aff   | dup | rare genic      |
| 16 | 33273782 | 33539035 | B00B12T | aff   | del | common nongenic |
| 16 | 33273782 | 33539167 | B00B0UN | aff   | del | common nongenic |
| 16 | 33278985 | 33539167 | B00B0EY | aff   | del | common nongenic |
| 16 | 33394311 | 33539167 | B009EFU | unaff | del | common nongenic |

|    |          |          |         |       |     |                   |
|----|----------|----------|---------|-------|-----|-------------------|
| 16 | 33394311 | 33539167 | B009EG1 | unaff | del | common nongenetic |
| 16 | 33394311 | 33539167 | B009RKV | unaff | del | common nongenetic |
| 16 | 33394311 | 33539167 | B00B0UD | aff   | del | common nongenetic |
| 16 | 33394311 | 33539167 | B00B106 | aff   | del | common nongenetic |
| 16 | 33394311 | 33539167 | B00BE1N | aff   | del | common nongenetic |
| 16 | 33394311 | 33539167 | B00BE3V | aff   | del | common nongenetic |
| 16 | 33394311 | 33539167 | B00BEHH | aff   | del | common nongenetic |
| 16 | 33394311 | 33539167 | B00BQQ1 | aff   | del | common nongenetic |
| 16 | 33394311 | 33564984 | B00B0J5 | aff   | del | common nongenetic |
| 16 | 33394311 | 33572169 | B00B0P8 | aff   | del | common nongenetic |
| 16 | 58464932 | 58785629 | B00B0I4 | aff   | dup | rare nongenetic   |
| 16 | 68621490 | 68759936 | B00AA94 | unaff | del | rare genic        |
| 16 | 76841262 | 78030355 | B00AB52 | unaff | dup | rare genic        |
| 16 | 76849354 | 77164850 | B00BE5I | aff   | del | rare genic        |
| 16 | 77606842 | 77795260 | B00BEGZ | aff   | del | rare genic        |
| 16 | 77908301 | 78158277 | B00BEGZ | aff   | del | rare nongenetic   |
| 16 | 83053555 | 83170906 | B00B14U | aff   | del | rare genic        |
| 16 | 87127381 | 87390089 | B00BEG6 | aff   | del | rare genic        |
| 16 | 88363824 | 88499917 | B00BDJE | aff   | del | rare genic        |
| 16 | 88397262 | 88551703 | B00B179 | aff   | del | rare genic        |
| 16 | 88423924 | 88612062 | B00BDJ7 | aff   | del | rare genic        |
| 17 | 5091377  | 5790081  | B00BQL3 | aff   | dup | rare genic        |
| 17 | 5531668  | 5954900  | B009G3V | aff   | del | rare genic        |
| 17 | 9277095  | 9548288  | B00B0LX | aff   | dup | common genic      |
| 17 | 9295229  | 10024100 | B009EF0 | unaff | dup | common genic      |

|    |          |          |         |       |     |                 |
|----|----------|----------|---------|-------|-----|-----------------|
| 17 | 9934287  | 10322546 | B00AAXQ | unaff | dup | rare genic      |
| 17 | 14040467 | 15292994 | B00AABJ | unaff | del | rare genic      |
| 17 | 14063278 | 15411904 | B009EBL | unaff | del | rare genic      |
| 17 | 31889664 | 33319881 | B00BEJV | aff   | dup | rare genic      |
| 17 | 31893304 | 33319881 | B009G3J | aff   | dup | rare genic      |
| 17 | 36465485 | 36596245 | B00BDI4 | aff   | del | rare genic      |
| 17 | 36465485 | 36596245 | B00BDJ8 | aff   | del | rare genic      |
| 17 | 36465485 | 36596245 | B00BE6R | aff   | del | rare genic      |
| 17 | 36465485 | 36596245 | B00BE99 | aff   | del | rare genic      |
| 17 | 36465485 | 36600044 | B00B16R | aff   | del | rare genic      |
| 17 | 36465485 | 36600822 | B00BE00 | aff   | del | rare genic      |
| 17 | 41525626 | 41710445 | B00AB29 | unaff | dup | rare genic      |
| 17 | 41525626 | 41981953 | B00BEML | aff   | dup | common genic    |
| 17 | 47932943 | 48190536 | B009EFM | unaff | del | rare nongenic   |
| 17 | 48306578 | 48668964 | B009G0I | aff   | del | rare nongenic   |
| 17 | 48306578 | 48668964 | B00B0K3 | aff   | del | rare nongenic   |
| 17 | 64172422 | 64556563 | B00B1BD | aff   | dup | rare genic      |
| 17 | 69345596 | 69595387 | B00AA7C | unaff | dup | common nongenic |
| 17 | 69345596 | 69936754 | B00BE5W | aff   | dup | common genic    |
| 17 | 69345596 | 70125184 | B00AA5L | unaff | dup | common genic    |
| 17 | 69345596 | 70164827 | B00AAY0 | unaff | dup | common genic    |
| 17 | 69345596 | 70164827 | B00B0KJ | aff   | dup | common genic    |
| 17 | 69345596 | 70164827 | B00BDJB | aff   | dup | common genic    |
| 17 | 69345596 | 70193536 | B00AADW | unaff | dup | common genic    |
| 17 | 69349814 | 69885849 | B009FO1 | aff   | dup | common genic    |

|    |          |          |         |       |     |                 |
|----|----------|----------|---------|-------|-----|-----------------|
| 18 | 321506   | 768384   | B00BEJT | aff   | dup | rare genic      |
| 18 | 362837   | 627631   | B00B0K7 | aff   | dup | rare genic      |
| 18 | 1410484  | 1608782  | B00AAJ6 | unaff | dup | rare nongenic   |
| 18 | 1721154  | 1828901  | B00B0HU | aff   | del | common nongenic |
| 18 | 1721154  | 1828901  | B00BDTR | aff   | del | common nongenic |
| 18 | 1721154  | 1828901  | B00BE0T | aff   | del | common nongenic |
| 18 | 1721154  | 1829564  | B009G3M | aff   | del | common nongenic |
| 18 | 1721154  | 1829564  | B009RLA | unaff | del | common nongenic |
| 18 | 1721154  | 1829564  | B00AAC2 | unaff | del | common nongenic |
| 18 | 1721154  | 1829564  | B00B0J0 | aff   | del | common nongenic |
| 18 | 1721154  | 1829564  | B00B0ZK | aff   | del | common nongenic |
| 18 | 1721154  | 1829564  | B00B11L | aff   | del | common nongenic |
| 18 | 1721154  | 1829564  | B00B12O | aff   | del | common nongenic |
| 18 | 1721154  | 1829564  | B00BEGZ | aff   | del | common nongenic |
| 18 | 1721154  | 1829564  | B00BEIN | aff   | del | common nongenic |
| 18 | 1721154  | 1829564  | B00BEM5 | aff   | del | common nongenic |
| 18 | 1721154  | 1829564  | B00BEVQ | aff   | del | common nongenic |
| 18 | 6916688  | 8075047  | B00AB75 | unaff | dup | rare genic      |
| 18 | 11552631 | 12106280 | B00B1BP | aff   | dup | rare genic      |
| 18 | 23583202 | 24244622 | B00BETY | aff   | del | rare genic      |
| 18 | 25484590 | 25686682 | B00AA9A | unaff | del | rare nongenic   |
| 18 | 32172476 | 32915958 | B00B128 | aff   | del | rare genic      |
| 18 | 55838553 | 55987860 | B00B0P9 | aff   | del | rare nongenic   |
| 18 | 55987860 | 56146902 | B00AA7B | unaff | del | rare nongenic   |
| 18 | 61036648 | 63031278 | B00BE6E | aff   | dup | rare genic      |



|    |          |          |         |       |     |                 |
|----|----------|----------|---------|-------|-----|-----------------|
| 18 | 62142318 | 62545066 | B00B0KF | aff   | dup | rare genic      |
| 18 | 62961829 | 63363992 | B009EDB | unaff | dup | rare genic      |
| 18 | 63049283 | 64344824 | B00BEVH | aff   | del | common genic    |
| 18 | 63076154 | 64412509 | B009RL5 | unaff | del | common genic    |
| 18 | 63216868 | 63596654 | B009FQM | aff   | del | common genic    |
| 18 | 63216868 | 63596654 | B00B0K3 | aff   | del | common genic    |
| 18 | 63843275 | 64353633 | B00BE79 | aff   | dup | common nongenic |
| 18 | 63843275 | 64668279 | B009EC1 | unaff | dup | rare genic      |
| 18 | 67052669 | 67587053 | B00AABH | unaff | del | rare genic      |
| 18 | 67351832 | 67470359 | B00BEH9 | aff   | del | common genic    |
| 18 | 69487787 | 70765301 | B00ABDE | unaff | dup | rare genic      |
| 18 | 73264159 | 74672711 | B00B0ZM | aff   | dup | rare nongenic   |
| 18 | 73514135 | 74227455 | B00BE2T | aff   | del | rare nongenic   |
| 18 | 75224938 | 75333697 | B00B17B | aff   | del | rare genic      |
| 18 | 75238190 | 75378707 | B00BE6R | aff   | del | rare genic      |
| 19 | 750770   | 878971   | B00B16Y | aff   | del | rare genic      |
| 19 | 15448185 | 15634915 | B00B0YQ | aff   | dup | rare genic      |
| 19 | 33567841 | 34304195 | B00B1AE | aff   | del | rare genic      |
| 19 | 44824665 | 45002337 | B00B0X1 | aff   | del | rare genic      |
| 19 | 48013905 | 48415842 | B00B0YA | aff   | del | rare genic      |
| 19 | 56979264 | 57299577 | B00BQR7 | aff   | dup | rare genic      |
| 19 | 57959318 | 58187145 | B00AAE2 | unaff | del | rare genic      |
| 19 | 58859082 | 59605946 | B00B0QH | aff   | dup | rare genic      |
| 19 | 59418963 | 59567135 | B00AAVB | unaff | dup | rare genic      |
| 20 | 8044130  | 8523671  | B00BEG9 | aff   | dup | rare genic      |

|    |          |          |         |       |     |               |
|----|----------|----------|---------|-------|-----|---------------|
| 20 | 11706999 | 12185727 | B00BDK2 | aff   | dup | rare genic    |
| 20 | 14598357 | 14812888 | B00B0WZ | aff   | del | common genic  |
| 20 | 14629863 | 14802935 | B00BE2D | aff   | del | common genic  |
| 20 | 14657451 | 14778453 | B00AA91 | unaff | del | rare genic    |
| 20 | 14685843 | 14788502 | B00BQLV | aff   | del | common genic  |
| 20 | 14709710 | 14991203 | B00B147 | aff   | del | common genic  |
| 20 | 14720789 | 14940542 | B00BQOV | aff   | del | common genic  |
| 20 | 14762090 | 15021680 | B00BQNF | aff   | del | common genic  |
| 20 | 14763778 | 15061008 | B00AB6E | unaff | del | common genic  |
| 20 | 14785965 | 15021680 | B00B0ZO | aff   | del | common genic  |
| 20 | 14796659 | 15068744 | B00ABCF | unaff | del | common genic  |
| 20 | 14858258 | 15143572 | B00B0UH | aff   | del | common genic  |
| 20 | 14859003 | 15091185 | B009FVA | aff   | del | common genic  |
| 20 | 14940542 | 15061008 | B00B0L7 | aff   | del | common genic  |
| 20 | 15361299 | 15485498 | B00B0I6 | aff   | del | rare genic    |
| 20 | 16645465 | 17227522 | B00BE5M | aff   | dup | rare genic    |
| 20 | 44520617 | 44666440 | B00AA9Y | unaff | dup | rare genic    |
| 20 | 49540120 | 49894738 | B009G0X | aff   | dup | rare genic    |
| 20 | 49552249 | 50485779 | B00BE74 | aff   | dup | rare genic    |
| 20 | 51371913 | 51989830 | B00BE74 | aff   | dup | rare genic    |
| 20 | 60308367 | 60758172 | B00B17B | aff   | del | rare genic    |
| 20 | 61029220 | 61189376 | B00BE2X | aff   | del | rare genic    |
| 20 | 61795777 | 61944148 | B00B0S6 | aff   | dup | rare genic    |
| 21 | 22969567 | 23285179 | B00BEVB | aff   | del | rare nongenic |
| 21 | 23255492 | 23409950 | B00B0ZL | aff   | del | rare nongenic |

|    |          |          |         |       |     |               |
|----|----------|----------|---------|-------|-----|---------------|
| 21 | 27097629 | 27851829 | B00BEF3 | aff   | del | rare genic    |
| 21 | 35841755 | 36391146 | B00BE07 | aff   | dup | common genic  |
| 21 | 35847942 | 36391146 | B009EH5 | unaff | dup | rare genic    |
| 21 | 39163152 | 41391114 | B00BE1I | aff   | dup | rare genic    |
| 21 | 44657340 | 44934972 | B00BE6R | aff   | del | rare genic    |
| 22 | 14899946 | 15230437 | B00B193 | aff   | dup | rare nongenic |
| 22 | 14899946 | 15230437 | B00BDN8 | aff   | dup | rare nongenic |
| 22 | 14906376 | 15230437 | B00B18S | aff   | dup | rare nongenic |
| 22 | 15434720 | 15832966 | B00ABAF | unaff | dup | rare genic    |
| 22 | 15447504 | 15661931 | B00AB23 | unaff | dup | rare genic    |
| 22 | 15447504 | 15832966 | B00AB5J | unaff | dup | rare genic    |
| 22 | 15608796 | 15832966 | B00AA8Y | unaff | dup | rare genic    |
| 22 | 15608796 | 15842185 | B00AAH6 | unaff | dup | rare genic    |
| 22 | 15634399 | 15842185 | B009EH8 | unaff | dup | rare genic    |
| 22 | 15774989 | 16104093 | B00BECQ | aff   | del | rare genic    |
| 22 | 17263687 | 17392855 | B00BE1M | aff   | del | rare genic    |
| 22 | 17281004 | 17393629 | B00BQR5 | aff   | dup | rare genic    |
| 22 | 19073536 | 19792353 | B00BEJC | aff   | del | rare genic    |
| 22 | 19795780 | 20024533 | B009G71 | aff   | dup | rare genic    |
| 22 | 20022108 | 21905642 | B00BE7D | aff   | del | rare genic    |
| 22 | 20638883 | 20903637 | B00BDZ8 | aff   | dup | common genic  |
| 22 | 20638883 | 20910314 | B00AB4I | unaff | dup | common genic  |
| 22 | 20641326 | 20892874 | B00AB7G | unaff | dup | common genic  |
| 22 | 20641326 | 20903637 | B00B0MB | aff   | dup | common genic  |
| 22 | 20641567 | 20903637 | B00AACT | unaff | del | common genic  |

|    |          |          |         |       |     |                 |
|----|----------|----------|---------|-------|-----|-----------------|
| 22 | 20642383 | 20903637 | B00AACC | unaff | del | common genic    |
| 22 | 20642383 | 20903637 | B00B15I | aff   | del | common genic    |
| 22 | 20642568 | 20903637 | B00AAJK | unaff | dup | common genic    |
| 22 | 20642568 | 20910314 | B00B1CM | aff   | dup | common genic    |
| 22 | 20645312 | 20830272 | B00AB7F | unaff | dup | common genic    |
| 22 | 20645312 | 20901854 | B00BQP9 | aff   | dup | common genic    |
| 22 | 20645312 | 20903637 | B009FPG | aff   | del | common genic    |
| 22 | 20645312 | 20903637 | B00B0D1 | aff   | dup | common genic    |
| 22 | 20658391 | 20903637 | B00AAGZ | unaff | dup | common genic    |
| 22 | 20658391 | 20903637 | B00ABBJ | unaff | dup | common genic    |
| 22 | 20679088 | 20847479 | B00B0CY | aff   | del | common nongenic |
| 22 | 20679088 | 20847673 | B00B0JD | aff   | del | common nongenic |
| 22 | 20679088 | 20847826 | B00AB6E | unaff | del | common nongenic |
| 22 | 20724227 | 20901854 | B00AB6C | unaff | dup | common nongenic |
| 22 | 20724227 | 20901854 | B00AB9N | unaff | dup | common nongenic |
| 22 | 20725035 | 20903637 | B009FW7 | aff   | dup | common nongenic |
| 22 | 20756901 | 20871057 | B00B0XT | aff   | dup | common nongenic |
| 22 | 20756901 | 20880884 | B00B16X | aff   | dup | common nongenic |
| 22 | 20766162 | 20903637 | B00BE8R | aff   | dup | common nongenic |
| 22 | 23994408 | 24230823 | B00B0UD | aff   | del | rare genic      |
| 22 | 23994408 | 24230823 | B00B128 | aff   | del | rare genic      |
| 22 | 23994408 | 24230823 | B00BDKN | aff   | del | rare genic      |
| 22 | 23994408 | 24230823 | B00BDZ9 | aff   | del | rare genic      |
| 22 | 23994408 | 24230823 | B00BE1M | aff   | del | rare genic      |
| 22 | 23994408 | 24235668 | B00BDS9 | aff   | del | rare genic      |

|    |          |          |         |       |     |                 |
|----|----------|----------|---------|-------|-----|-----------------|
| 22 | 23994408 | 24240667 | B009FQV | aff   | del | rare genic      |
| 22 | 23994408 | 24240667 | B009G57 | aff   | del | rare genic      |
| 22 | 23994408 | 24240667 | B009G7K | aff   | del | rare genic      |
| 22 | 23994408 | 24240667 | B00BQPO | aff   | dup | common genic    |
| 22 | 23994408 | 24240667 | B00BQR9 | aff   | del | rare genic      |
| 22 | 24016040 | 24257716 | B00AB75 | unaff | dup | common genic    |
| 22 | 24017514 | 24240667 | B009G8J | aff   | del | rare genic      |
| 22 | 24056992 | 24240667 | B00BDUD | aff   | dup | common genic    |
| 22 | 31789131 | 31977908 | B00B0IH | aff   | del | rare nongenic   |
| 22 | 44801602 | 44911445 | B00B17A | aff   | del | rare genic      |
| 22 | 47531306 | 47981564 | B00AAHN | unaff | dup | rare genic      |
| 22 | 47776066 | 48154681 | B00AA7T | unaff | dup | rare nongenic   |
| 22 | 47776066 | 48163738 | B00BEL9 | aff   | dup | common nongenic |
| 22 | 47776066 | 48354724 | B00AACD | unaff | dup | rare nongenic   |
| 22 | 47897487 | 48154681 | B00BQQT | aff   | dup | common nongenic |
